# Supplementary material
Source: publisher figshare collection journal article supplement (https://gsapubs.figshare.com/ndownloader/files/23319197)
Supplement: Supplementary file 1 [file 23319197]

Archive with 11 entries (11 files):
- Table-DR1.xlsx
- Table-DR2.xls
- Table-DR3.xlsx
- Table-DR4.xlsx
- Table-DR5.xlsx
- Text-DR1.pdf
- Text-DR2.pdf
- Text-DR3.pdf
- Text-DR4.pdf
- Text-DR5.pdf
- 2020099-DR-overview.pdf
