# Supplementary material
Source: publisher figshare collection journal article supplement (https://gsapubs.figshare.com/ndownloader/files/23319197)
Supplement: Supplementary file 1 [file 23319197 › 2020099-DR-overview.pdf]

## Overview and description of files

GSA Supplemental Material 2020099 accompanies

Youbi, N., Ernst, R.E., Soderlund, U., Boumehdi, M.A., Ait Lahna, A., Tassinari, C.C.G., El Moume, W., and Bensalah, M.K., 2020, The Central Iapetus magmatic province: An updated review and link with the ca. 580 Ma Gaskiers glaciation, in Adatte, T., Bond, D.P.G., and Keller, G., eds., Mass Extinctions, Volcanism, and Impacts: New Developments: Geological Society of America Special Paper 544, p. 35–66, [https://doi.org/10.1130/2020.2544\(02\)](https://doi.org/10.1130/2020.2544(02)).

**Table DR1.** Compilation of U-Pb radiometric dates that are relevant to Ediacaran glacigenic formations.

**Text DR1.** References cited in **Table DR1**.

**Text DR2.** Report on the zircon U-Pb SHRIMP geochronology of the rhyodacitic juvenile fragment located at the uppermost top of the Ouarzazte Group volcanic pile (sample BP13) in the Bou Azzer inlier.

**Table DR2.** SHRIMP zircon U-Th-Pb results of the rhyodacitic juvenile fragment located at the uppermost top of the Ouarzazte Group volcanic pile (sample BP13) in the Bou Azzer inlier.

**Table DR3.** Selection of U-Pb geochronological data recording magmatic pulses of the Ediacaran–Cambrian Central Iapetus magmatic province in Laurentia.

**Text DR3.** References cited in **Table DR3**.

**Table DR4.** Selection of U-Pb geochronological data recording magmatic pulses of the Ediacaran–Cambrian Central Iapetus magmatic province in Baltica.

**Text DR4.** References cited in **Table DR4**.

**Table DR5.** Selection of U-Pb geochronological data recording magmatic pulses of the Central Iapetus magmatic province in the northern portion of the West African craton

**Text DR5.** References cited in **Table DR5**.
