# Supplementary material
Source: publisher figshare collection journal article supplement (https://gsapubs.figshare.com/ndownloader/files/23319197)
Supplement: Supplementary file 1 [file 23319197 › Table-DR1.xlsx]

## Sheet: Feuil1
DR2020099 accompanies Youbi, N., Ernst, R.E., Soderlund, U., Boumehdi, M.A., Ait Lahna, A., Tassinari, C.C.G., El Moume, W., and Bensalah, M.K., 2020, The Central Iapetus magmatic province: An updated review and link with the ca. 580 Ma Gaskiers glaciation,
in Adatte, T., Bond, D.P.G., and Keller, G., eds., Mass Extinctions, Volcanism, and Impacts: New Developments: Geological Society of America Special Paper 544, p. 35–66, https://doi.org/10.1130/2020.2544(02).
Table DR1. Compilation of U-Pb radiometric dates that are relevant to Ediacaran glacigenic formations. (After MacGabhann, 2005; Smith, 2009; Hoffman and Li, 2009, McGee et al., 2013, and Spence et al., 2016 completed by this work). Radiometric dates are tabulated as reported in the original literature. No corrections have been made with regard to decay constant, standard calibration, and trace ca…
						1		2	3
Palaeocontinent (region)	Glaciation ( "Gaskiers" named for deposits in Newfounland in Canada/ Varanger, or Varangian, named for deposits in Scandinavia)	Megaunit1 (Succession/Basin/Supergroup/SubGroup/Group)	Megaunit2 (Formation/Member/Suite)	Definition	Sample Id	Mineral	System	Method	type	Age	±2σ	2σ	Reference
Africa (Anti-Atlas, Bou Azzer inlier)	Bou Azzer	Ourzazate Group	Aourz	Trachytic pebble from breccia horizon located at the uppermost top of the Ourzazate Group volcanic pile	BOPC343	Zrn	U-Pb	SHRIMP		541	± 6	6	Blein et al., (2014a)
Africa (Anti-Atlas, Bou Azzer inlier)	Bou Azzer	Ourzazate Group	Aourz	Andesitic juvenile fragment sampled from tuffaceous conglomerate located at the top of the Ourzazate Group volcanic pile	BP13	Zrn	U-Pb	SHRIMP	conc	578.6	± 4.8	4.8	This Work
Africa (Anti-Atlas, Bou Azzer inlier)	Bou Azzer	Ourzazate Group	Aourz	Welded tuff collected in the Bou Azzer-El Graara inlier at the bottom of the Ouarzazate Group. The welded-tuff is mapped as ignimbrite of the Jbel Timeskrine member of the Aourz Formation (Blein et al., 2014).	ALDG20	Zrn	U-Pb	SHRIMP		567	± 5	5	Blein et al., (2014a)
Africa (Anti-Atlas, Bou Azzer inlier)	Bou Azzer	Ourzazate Group	Aourz	Welded tuff collected in the Saghro massif at the top of the Ouarzazate Group. The welded-tuff is mapped as ignimbrite of the Jbel Timeskrine member of the Aourz Formation (Blein et al., 2014).	BODG6	Zrn	U-Pb	SHRIMP		566	± 4	4	Blein et al., (2014a)
Africa (Anti-Atlas, Bou Azzer inlier)	Bou Azzer	Ourzazate Group	The Bleida granodiorite is intrusive within the Late Tonian-Early Cryogenian Bleida Group and in the Upper Cryogenian ophiolites of the Bou Azzer Group. The Ourzazate Group unconformably overlies the Bleida granodiorite	Bleida granodiorite		Zrn	U-Pb	TIMS		579.4	± 1.2	1.2	Inglis et al., (2004)
Africa (Anti-Atlas, Bou Azzer inlier)	Bou Azzer	Ourzazate Group	The Bleida granodiorite is intrusive within the Late Tonian-Early Cryogenian Bleida Group and in the Upper Cryogenian ophiolites of the Bou Azzer Group. The Ourzazate Group unconformably overlies the Bleida granodiorite	Bleida granodiorite		Zrn	U-Pb	TIMS		578.5	± 1.2	1.2	Inglis et al., (2004)
Africa (Anti-Atlas, Bou Azzer inlier)	Bou Azzer	Ourzazate Group	The Bleida granodiorite is intrusive within the Late Tonian-Early Cryogenian Bleida Group and in the Upper Cryogenian ophiolites of the Bou Azzer Group. The Ourzazate Group unconformably overlies the Bleida granodiorite	Bleida granodiorite	AGDG1	Zrn	U-Pb	SIMS		586	± 15	15	Blein et al., (2014a)
Africa (Anti-Atlas, Bou Azzer inlier)	Bou Azzer	Ourzazate Group	The Bleida granodiorite is intrusive within the Late Tonian-Early Cryogenian Bleida Group and in the Upper Cryogenian ophiolites of the Bou Azzer Group. The Ourzazate Group unconformably overlies the Bleida granodiorite	Bleida granodiorite		Zrn	U-Pb	SIMS		595.2	± 3.4	3.4	Maloof, (2004)
Africa (Anti-Atlas, Bou Azzer inlier)	Bou Azzer	Ourzazate Group	The Bleida granodiorite is intrusive within the Late Tonian-Early Cryogenian Bleida Group and in the Upper Cryogenian ophiolites of the Bou Azzer Group. The Ourzazate Group unconformably overlies the Bleida granodiorite	Bleida granodiorite		Zrn	U-Pb	SIMS		596.6	± 7.2	7.2	Maloof, (2004)
Africa (Anti-Atlas, Bou Azzer inlier)	Bou Azzer	Ourzazate Group	The Bleida granodiorite is intrusive within the Late Tonian-Early Cryogenian Bleida Group and in the Upper Cryogenian ophiolites of the Bou Azzer Group. The Ourzazate Group unconformably overlies the Bleida granodiorite	Bleida granodiorite		Zrn	U-Pb	SIMS		615	± 12	12	Durcot (1978); Durcot (1979)
Africa (Anti-Atlas, Bou Azzer inlier)	Tiddiline	Ourzazate Group	The Bleida granodiorite is intrusive within the Late Tonian-Early Cryogenian Bleida Group and in the Upper Cryogenian ophiolites of the Bou Azzer Group. The Ourzazate Group unconformably overlies the Bleida granodiorite	Bleida granodiorite		Zrn	U-Pb	TIMS		579.4	± 1.2	1.2	Inglis et al., (2004)
Africa (Anti-Atlas, Bou Azzer inlier)	Tiddiline	Ourzazate Group	The Bleida granodiorite is intrusive within the Late Tonian-Early Cryogenian Bleida Group and in the Upper Cryogenian ophiolites of the Bou Azzer Group. The Ourzazate Group unconformably overlies the Bleida granodiorite	Bleida granodiorite		Zrn	U-Pb	TIMS		578.5	± 1.2	1.2	Inglis et al., (2004)
Africa (Anti-Atlas, Bou Azzer inlier)	Tiddiline	Ourzazate Group	The Bleida granodiorite is intrusive within the Late Tonian-Early Cryogenian Bleida Group and in the Upper Cryogenian ophiolites of the Bou Azzer Group. The Ourzazate Group unconformably overlies the Bleida granodiorite	Bleida granodiorite	AGDG1	Zrn	U-Pb	SIMS		586	± 15	15	Blein et al., (2014a)
Africa (Anti-Atlas, Bou Azzer inlier)	Tiddiline	Ourzazate Group	The Bleida granodiorite is intrusive within the Late Tonian-Early Cryogenian Bleida Group and in the Upper Cryogenian ophiolites of the Bou Azzer Group. The Ourzazate Group unconformably overlies the Bleida granodiorite	Bleida granodiorite		Zrn	U-Pb	SIMS		595.2	± 3.4	3.4	Maloof, (2004)
Africa (Anti-Atlas, Bou Azzer inlier)	Tiddiline	Ourzazate Group	The Bleida granodiorite is intrusive within the Late Tonian-Early Cryogenian Bleida Group and in the Upper Cryogenian ophiolites of the Bou Azzer Group. The Ourzazate Group unconformably overlies the Bleida granodiorite	Bleida granodiorite		Zrn	U-Pb	SIMS		596.6	± 7.2	7.2	Maloof, (2004)
Africa (Anti-Atlas, Bou Azzer inlier)	Tiddiline	Ourzazate Group	The Bleida granodiorite is intrusive within the Late Tonian-Early Cryogenian Bleida Group and in the Upper Cryogenian ophiolites of the Bou Azzer Group. The Ourzazate Group unconformably overlies the Bleida granodiorite	Bleida granodiorite		Zrn	U-Pb	SIMS		615	± 12	12	Durcot (1978); Durcot (1979)
Africa (Anti-Atlas, Bou Azzer inlier)	Tiddiline	Tiddiline Formation	Tiddiline Group	Diamictite NW Ait Ahmane town (Ait Ahmane section)	14DL36	Zrn	U-Pb	LA-ICP-MS/CA-ID-TIMS (detrital zircons)		592 .68	± 0.12	0.12	Letsch et al., (2018a)
Africa (Anti-Atlas, Bou Azzer inlier)	Tiddiline	Tiddiline Formation	Tiddiline Group	Diamictite SW Bou Azzer town/mine (Bou Azzer section)	15DL26	Zrn	U-Pb	LA-ICP-MS (detrital zircons)		ca. 593 (mode)			Letsch et al., (2018a)
Africa (Anti-Atlas, Bou Azzer inlier)	Tiddiline	Tiddiline Formation	Tiddiline Group	Rhyolitic welded tuff located at the top of the Tiddiline Group (Formation) conformably overlaying cross-bedded quartzofeldspathic sandstones in the eastern part of the Bou Azer-El Graara inlier	ALDG21	Zrn	U-Pb	SHRIMP		606	± 4	4	Blein et al., (2014a)
Africa (Anti-Atlas, Bou Azzer inlier)	Tiddiline	Tiddiline Formation	Tiddiline Group	Trachytic dyke of the the Tiddiline Group (Formation) which crosscutt the Tachdamt-Bleïda Group	ALDG4	Zrn	U-Pb	SHRIMP		606	± 5	5	Blein et al., (2014a)
Africa (Anti-Atlas, Bou Azzer inlier)	Tiddiline	Tiddiline Formation	Tiddiline Group	Sandstone of the the Tiddiline Group (Formation) sampled in the Dwaissa basin	AGEE24	Zrn	U-Pb	SHRIMP (detrital zircons)		606	± 14	14	Blein et al., (2014a)
Africa (Anti-Atlas, Bou Azzer inlier)	Tiddiline	Tiddiline Formation	Tiddiline Group	Folded beds of the Tiddiline conglomerate located east of Ait Ahmane town		Zrn	U-Pb	TIMS (detrital zircons)		604	± 18	18	Hefferan et al., (2012)
Africa (Anti-Atlas, Bou Azzer inlier)	Tiddiline	Tiddiline Formation (Late Cryogenian Volcanics)	Tiddiline Group	Quartz phyric volcanic rocks exposed in the northern Tiddiline basin and historically associated with the Tiddiline Formation		Zrn	U-Pb	TIMS		639	± 24 Ma	24	Hefferan et al., (2012)
Africa (Anti-Atlas, Bou Azzer inlier)	Tiddiline		Late Cryogenian Granitoid	Ousdrat quartz diorite. This intrusion is exposed in the northern part of the Bou Azzer El Graara inlier hosted by phosed metagreywackes, keratophyres, and metamorand tuffs of the northern forearc metasediments. A faulted contact with members of the Tiddiline Formation marks the intrusion’s southern boundary. To the north, members of the Ouarzazate Supergroup unconformably overlie the intrusion.		Zrn	U-Pb	TIMS		640.8	± 1.4	1.4	Inglis et al., (2005)
Africa (Anti-Atlas, Zenaga inlier)	Tiddiline ?	Ourzazate Group	Tisgadal Formation or Tamanet Formation according to Thomas et al., (2002)	Coarse grained diamictites (Izdar Member) NNW Taghdout town (Taghdout section)	14DL11	Zrn	U-Pb	LA-ICP-MS (detrital zircons)		592.31	± 0.18	0.18	Letsch et al., (2018b)
Africa (Anti-Atlas, Zenaga inlier)	Tiddiline ?	Ouarzazate Group		Upper rhyolitic ignimbrite Post-Diamictite (Ansra section)	14DL15	Zrn	U-Pb	LA-ICP-MS		574.9	±3	3	Letsch et al., (2018b)
Africa (Anti-Atlas, Zenaga inlier)	Tiddiline ?	Ouarzazate Group		Sandstone beds Post-Diamictite (Ansra section)	14DL22	Zrn	U-Pb	LA-ICP-MS		ca. 593 (mode)			Letsch et al., (2018b)
Africa (Anti-Atlas, Zenaga inlier)	Tiddiline ?	Ouarzazate Group		Lower rhyolitic ignimbrite Post-Diamictite (Ansra section)	14DL21	Zrn	U-Pb	LA-ICP-MS/CA-ID-TIMS		593.12	± 0.14	3	Letsch et al., (2018b)
Africa (Anti-Atlas, Siroua inlier)	Tiddiline ?	Saghro Group of Siroua inlier/ Equivalent to the Tiddiline Group of Bou Azzer inlier		Coarse grained diamictites. Massive, matrix supported diamictite partly with signs of reworking / SSW Tizouate (Tizwat) town (Tizouate section)	15DL32	Zrn	U-Pb	LA-ICP-MS/CA-ID-TIMS (detrital zircons)		592 .84	± 0.17	0.17	Letsch et al., (2018b)
Arabia (Northwestern Arabian Shield, Saudi Arabia)	Unnamed	Jibalah Group	Dhaiqa	Fine-grained green sandstone within the sequence of limestone that forms the middle part of the Dhaiqa Formation. Polymict conglomerates (diamictites) occur in the Mataar Formation and near 180 m in the Dhaiqa Formation	DY-1	Zrn	U-Pb	SHRIMP (detrital zircons)		599	± 4.8	4.8	Miller et al., (2008)
Arabia (Northwestern Arabian Shield, Saudi Arabia)	Unnamed	Jibalah Group	Dhaiqa	Fine-grained green sandstone within the sequence of limestone that forms the middle part of the Dhaiqa Formation. Polymict conglomerates (diamictites) occur in the Mataar Formation and near 180 m in the Dhaiqa Formation	DY-1	Zrn	U-Pb	SHRIMP (detrital zircons)		570	± 4.6	4.6	Miller et al., (2008)
Arabia (Northeastern Arabian Shield, Saudi Arabia)	Unnamed	Jibalah Group		Felsic dyke that intrude the top of the Jibalah Group	MAT-2	Zrn	U-Pb	TIMS		576.6	± 5.3	5.3	Kusky and Matsah (2003)
Arabia (Northeastern Arabian Shield, Saudi Arabia)	Unnamed	Jibalah Group		Murdamah rhyolite and felsic volcanics which are uncomformably overlain by the Jibalah Group.	Ryo-1	Zrn	U-Pb	TIMS		624.9	± 4.2	4.2	Kusky and Matsah (2003)
Arabia (Northeastern Arabian Shield, Saudi Arabia)	Unnamed	Jibalah Group	Dhaiqa	An ash bed just below the diamictite		Zrn	U-Pb			560	± 4	4	Vickers-Rich and Fedonkin (2007)
Asia (Central Alborz Mountains, Northern Iran)	Unnamed		Kahar	Sandstones from Kahar Mountain sampled below the diamictite of ( − 13 m) Kahar Formation	Sample KN1 ( −13 m)	Zrn	U-Pb	LA-ICP-MS (detrital zircons)		563.1	± 3.9	3.9	Etemad-Saeed et al., (2016)
Asia (Central Alborz Mountains, Northern Iran)	Unnamed		Kahar	Sandstones from Kahar Mountain sampled below the diamictite of ( −0.5 m) Kahar Formation	Sample KN2 ( −0.5 m)	Zrn	U-Pb	LA-ICP-MS (detrital zircons)		550.7	± 3.0	3.0	Etemad-Saeed et al., (2016)
Asia (Central Alborz Mountains, Northern Iran)	Unnamed		Kahar	Sandstones from Sarbandan sampled above the diamictite (+134 m) of Kahar Formation	Sample KS1 (+134 m	Zrn	U-Pb	LA-ICP-MS (detrital zircons)		550.3	± 3.6	3.6	Etemad-Saeed et al., (2016)
Asia (Central Alborz Mountains, Northern Iran)	Unnamed		Kahar	Sandstones from Sarbandan sampled above the diamictite (+150 m) of Kahar Formation	Sample KS2 (+150 m)	Zrn	U-Pb	LA-ICP-MS (detrital zircons)		571.6	± 12.3	12.3	Etemad-Saeed et al., (2016)
Asia (Central Alborz Mountains, Northern Iran)	Unnamed		Kahar	Sandstones from Sarbandan sampled above the diamictite (+150 m) of Kahar Formation	Sample KS2 (+150 m)	Zrn	U-Pb	LA-ICP-MS (detrital zircons)		584.6	± 0.6	0.6	Etemad-Saeed et al., (2016)
Asia (Central Alborz Mountains, Northern Iran)	Unnamed		Kahar	Sandstones from Sarbandan sampled above the diamictite (+150 m) of Kahar Formation	Sample KS2 (+150 m)	Zrn	U-Pb	LA-ICP-MS (detrital zircons)		562.9	± 4.3	4.3	Etemad-Saeed et al., (2016)
Amazonia (Northern Paraguay belt, Brazil)	Unnamed	Alto Paraguay	Serra Azul	Brown maroon diamictite with a fine silty matrix from Serra Azul Formation	BSA-07	Zrn	U-Pb	LA-ICP-MS (detrital zircons)	207/206	646	± 75	75	McGee et al., (2015)
Amazonia (Northern Paraguay belt, Brazil)	Unnamed	Alto Paraguay	Serra Azul	Medium to Fine-grained sandstone from Serra Azul Formation	PS 07	Zrn	U-Pb	LA-ICP-MS (detrital zircons)	206/238	619	± 7	7	De Souza (2015)
Amazonia (Northern Paraguay belt, Brazil)	Unnamed	Alto Paraguay	Serra Azul	Medium to Fine-grained sandstone from Serra Azul Formation	PS 07	Zrn	U-Pb	LA-ICP-MS (detrital zircons)	206/238	593	± 4	4	De Souza (2015)
Amazonia (Northern Paraguay belt, Brazil)	Unnamed	Alto Paraguay		Mature, white coarse sandstone from Diamantino Formation from the top of the sequence of the Alto Paraguay Group	BDM-01	Zrn	U-Pb	LA-ICP-MS (detrital zircons)	207/206	560	± 13	13	McGee et al., (2015)
Amazonia (Northern Paraguay belt, Brazil)	Unnamed	Alto Paraguay		Mature, white coarse sandstone from Diamantino Formation from the top of the sequence of the Alto Paraguay Group	BDM-01	Zrn	U-Pb	LA-ICP-MS (detrital zircons)	207/206	528	± 9	9	McGee et al., (2015)
Amazonia (Northern Paraguay belt, Brazil)	Unnamed	Alto Paraguay		Medium to Fine-grained from Diamantino Formation from the top of the sequence of the Alto Paraguay Group	PS 10	Zrn	U-Pb	LA-ICP-MS (detrital zircons)	206/238	567	± 4	4	De Souza (2015)
Australia (NW Australia)	Egan	Kimberleys	Egan	The Milliwindi Dyke, a feeder to the Antrim Pleateau Volcanics that unconformably overlie the Louisa Downs Group at the top of the Neoproterozoic succession.	MWD1	Zrn	U-Pb	SHRIMP	207/206	513	± 12	12	Hanley and Wingate (2000)
Australia (NW Australia)	Egan	Kimberleys	Egan	The Milliwindi Dyke, a feeder to the Antrim Pleateau Volcanics that unconformably overlie the Louisa Downs Group at the top of the Neoproterozoic succession.	MWD1 zircons of Hanley and Wingate (2000)	Zrn	U-Pb	ID-TIMS (CA-ID-TIMS)	206/238	510.67	± 0.62	0.62	Jourdan et al., (2014)
Australia (NW Australia)	Egan	Kimberleys	Egan	The Canning Basin basement intrusion from Munro well, a feeder to the Antrim Pleateau Volcanics that unconformably overlie the Louisa Downs Group at the top of the Neoproterozoic succession.	Well Munro 01/Sample B01	Bdl	U-Pb	TIMS	206/238	512.5	± 4.3	4.3	Jourdan et al., (2014)
Avalonia (Newfoundland, Canada)	Gaskiers	Conception		Ash beds Post-Gaskiers Formation, Newfoundland; locality given in Pu et al., (2016). This age represent the minimum age constraint on glacigenic strata	X	Zrn	U-Pb	ID-TIMS		582.10	± 0.40	0.40	Bowring et al. (2003)
Avalonia (Newfoundland, Canada)	Gaskiers	Conception	Gaskiers	Ash beds Within-Gaskiers Formation, Newfoundland; locality given in (Pu et al., 2016). This age represent the age constraint on glacigenic strata	X	Zrn	U-Pb	ID-TIMS		582.40	± 0.40	0.40	Bowring et al. (2003)
Avalonia (Newfoundland, Canada)	Gaskiers	Conception		Ash beds Pre-Gaskiers Formation, Newfoundland; locality given in Pu et al., (2016). This age represent the maximum age constraint on glacigenic strata	X	Zrn	U-Pb	ID-TIMS		583.70	± 0.60	0.60	Bowring et al. (2003)
Avalonia (St. Mary’s Bay, Newfoundland, Canada)	Gaskiers	Conception	Drook	Ash beds Post-Gaskiers Formation, Newfoundland; locality given in Pu et al., (2016). This age represent the minimum age constraint on glacigenic strata	NoP-0.9	Zrn	U-Pb	CA-ID-TIMS		579.88	± 0.44	0.44	Pu et al., (2016)
Avalonia (St. Mary’s Bay, Newfoundland, Canada)	Gaskiers	Conception	Mall Bay	Ash beds Pre-Gaskiers Formation, Newfoundland; locality given in Pu et al., (2016). This age represent the maximum age constraint on glacigenic strata	GCI-7.75	Zrn	U-Pb	CA-ID-TIMS		580.34	± 0.52	0.52	Pu et al., (2016)
Avalonia (St. Mary’s Bay, Newfoundland, Canada)	Gaskiers	Conception	Mall Bay	Ash beds Pre-Gaskiers Formation, Newfoundland; locality given in Pu et al., (2016). This age represent the maximum age constraint on glacigenic strata	GCI-6.55	Zrn	U-Pb	CA-ID-TIMS		580.90	±0.40	0.40	Pu et al., (2016)
Avalonia (Bonavista Peninsula, Trinity, Newfoundland, Canada)	Gaskiers	Musgravetown	Rocky Harbour	Ash beds Within-Gaskiers Formation, Newfoundland; locality given in (Pu et al., 2016). This age represent the age constraint on glacigenic strata	OBJP-03	Zrn	U-Pb	CA-ID-TIMS		579.35	± 0.33	0.33	Pu et al., (2016)
Avalonia (Bonavista Peninsula, Trinity, Newfoundland, Canada)	Gaskiers	Musgravetown	Rocky Harbour	Ash beds Post-Gaskiers Formation, Newfoundland; locality given in Pu et al., (2016). This age represent the minimum age constraint on glacigenic strata	OBJP-01	Zrn	U-Pb	CA-ID-TIMS		579.24	±0.17	0.17	Pu et al., (2016)
Avalonia (Bonavista Peninsula, Trinity, Newfoundland, Canada)	Gaskiers	Musgravetown	Rocky Harbour	Ash beds Pre-Gaskiers Formation, Newfoundland; locality given in Pu et al., (2016). This age represent the maximum age constraint on glacigenic strata	B1552	Zrn	U-Pb	CA-ID-TIMS		579.63	± 0.15	0.15	Pu et al., (2016)
Avalonia (Boston Basin, Massachusetts, USA)	Squantum	Boston Bay	Squantum	Coarse sandstone immediately below a prominent lonestone horizon on the western end of Squantum Head	MT99-4	Zrn	U-Pb	ID-TIMS	207/206	593	± 3	3	Thompson and Bowring, (2000)
Avalonia (Boston Basin, Massachusetts, USA)	Squantum	Boston Bay	Squantum	Crystal-poor tuff clast from diamictite	W94-3	Zrn	U-Pb	ID-TIMS	207/206	600	± 1	1	Thompson and Bowring, (2000)
Avalonia (Boston Basin, Massachusetts, USA)	Squantum	Boston Bay	Squantum	Porphyritic granophyre clast from diamictite	AW94-4	Zrn	U-Pb	ID-TIMS	up.int	610	± 2	2	Thompson and Bowring, (2000)
Avalonia (Boston Basin, Massachusetts, USA)	Squantum	Boston Bay	Squantum	Welded tuff clast from diamictite	MT96-6	Zrn	U-Pb	ID-TIMS	207/206	595	± 2	2	Thompson and Bowring, (2000)
Avalonia (Boston Basin, Massachusetts, USA)	Squantum	Boston Bay	Cambridge Argillite	Core boring from City Tunnel Extension in Somerville Massachusetts. This date represents the best estimate of the maximum depositional age of Cambridge Argillite	Sample 198-14	Zrn	U-Pb	ID-TIMS	207/206	596	± 5	5	Thompson and Bowring, (2000)
Avalonia (Boston Basin, Massachusetts, USA)	Squantum	Boston Bay	Cambridge Argillite	Post-Squantum Mystic River Quarry ash bed	MT92-4BC	Zrn	U-Pb	ID-TIMS		567.6	± 3	3	Thompson and Bowring, (2000)
Avalonia (Boston Basin, Massachusetts, USA)	Squantum	Boston Bay	Cambridge Argillite	Post-Squantum Mystic River Quarry ash bed	MT92-4BC	Zrn	U-Pb	ID-TIMS		567.6	± 3	3	Thompson and Bowring, (2000)
Avalonia (Boston Basin, Massachusetts, USA)		Boston Bay	Brookline Member/Brighton Igneous Suite	Andesite at the top of the Brookline Member/Post-Squantum diamictites. Squantum glaciomarine strata at the top of the Roxbury Conglomerate lie above the 585.37 ± 0.72 Ma Brighton intrusions lower in the section, and may be closer in age than can be established by 599 to 595 Ma maximum depositional	BOS22A	Zrn	U-Pb	CA-TIMS		585.37	± 0.72	0.72	Thompson et al., (2014)
Avalonia (Boston Basin, Massachusetts, USA)		Boston Bay	Brookline Member/Brighton Igneous Suite	Dacite at the base of the Brookline Member/Post-Squantum diamictites. Squantum glaciomarine strata at the top of the Roxbury Conglomerate lie above the 585.37 ± 0.72 Ma Brighton intrusions lower in the section, and may be closer in age than can be established by 599 to 595 Ma maximum depositional	MT03-09A	Zrn	U-Pb	CA-TIMS		584.19	± 0.70	0.70	Thompson et al., (2014)
Avalonia (Boston Basin, Massachusetts, USA)		Boston Bay	Franklin Park Member/Roxbury Conglomerate	Medium-grained lithic arenite from Franklin Park Member below Squantum diamictites	MT04-20	Zrn	U-Pb	CA-TIMS		595.14	± 0.90	0.90	Thompson et al., (2014)
Avalonia (Boston Basin, Massachusetts, USA)		Boston Bay	Brookline Member/Roxbury Conglomerate	Coarse-grained lithic wacke from Brookline Member below Squantum diamictites	MT10-12	Zrn	U-Pb	CA-TIMS		598.87	± 0.71	0.71	Thompson et al., (2014)
Avalonia (Boston Basin, Massachusetts, USA)		Boston Bay	Squantum Member/Roxbury Conglomerate	Sandstone from the Squantum “tillite” member at the top of the Roxbury Conglomerate	MT99-4	Zrn	U-Pb	CA-TIMS		596.39	± 0.79	0.79	Thompson et al., (2014)
Baltica (N Norway)	Varangerian	Verstertana	Mortensnes	Stratigraphic position									Edwards (1984); Rice et al., (2011)
Baltica (S Norway)	Varangerian	Sparagmite basin/ Hedmark Group	Moelv	Poorly sorted coarse-grained arkose from Rendalen Formation	B01104	Zrn	U-Pb	LA-ICP-MS		620	±14	14	Nystuen (1976); Bingen et al., (2005)
Baltica (S Norway)	Varangerian	Sparagmite basin/ Hedmark Group	Moelv	The Biri Formation located at the bottom of the Moelv diamictites is dated at 560.6 ± 4.4 Ma (Re-Os method; Hannah et al., 2008)									Hannah et al., (2008)
Baltica (West-Central Sweden)	Lillfjället	Tossåsfjället Group of the Särv Nappe of the Caledonian Middle Allochthon	Lillfjället	Ottfjället dolerite dyke swarm which cut Tossåsfjället Group. These dolerites are commonly correlated with extensive dyke swarms in other parts of the Scandinavian Caledonides, providing ages in the interval c. 610-550 Ma (Svenningsen 2001; Paulsson & Andréasson 2002; Baird et al., 2014; Kirsch and Svenningsen, 2015)	X	Bdl	U-Pb	TIMS		596			Kumpulainen et al., (2016)
Baltica (Middle and Northern Urals)		Eastern Europe	Vilchitsy	Stratigraphic position									Chumakov (2004)
Baltica ( Western slope of the Central Urals )		Sylvitsa	Starye Pechi	Volcanic tuffs from the upper part of the Starye Pechi Formation in the Vilukha Hole on the left side of the Us’va River. Diamictites are located at the bottom of the Starye Pechi Formation	Sample Sp 1	Zrn	U-Pb	LA-ICP-MS		561	± 36	36	Maslov et al., (2013)
Baltica ( Western slope of the Central Urals )		Sylvitsa	Starye Pechi	Volcanic tuffs from Perevalok Formation of the Sylvitsa Group, Central Urals. The formation is overlying the Starye Pechi Formation with the last level of diamictites	Sample 09 03 15	Zrn	U-Pb	LA-ICP-MS		567.2	± 3.9	3.9	Grazhdankin et al., (2011); Maslov et al., (2013)
Baltica ( Western slope of the Central Urals )		Sylvitsa	Starye Pechi	Ash interbed at the base of the Chernokamen Formation	Sample Us272	Zrn	U-Pb	SHRIMP		557	± 13	13	Ronkin et al., (2006); Maslov et al., (2013)
Baltica ( Western slope of the Central Urals )		Sylvitsa	Starye Pechi	Host mudstone of the ash interbed at the base of the Chernokamen Formation	Sample UsA	Zrn	U-Pb	SHRIMP		557	± 10	10	Ronkin et al., (2006); Maslov et al., (2013)
Baltica ( Western slope of the Central Urals )		Sylvitsa	Starye Pechi	Volcanic tuffs from the Ust’–Sylvitsa Formation at the top of the Sylvitsa Group. Since ash interbeds are located near the foot of sandstone of the Takata Formation, the deposits hosting these interbeds are related to the Ust’–Sylvitsa Formation at the top of the Sylvitsa Group.	Sample K10-161	Zrn	U-Pb	LA-ICP-MS		563.5	± 3.5	3.5	Kuznetsov et al., (2017)
Baltica ( Western slope of the Central Urals )		Serebryanka	Tany	Pillow basalts from the basal part of the Tany Formation which constitute the first level with diamictites	Sample 11 m 007	Zrn	U-Pb	LA-ICP-MS		598.1	± 6.0	6.0	Maslov et al., (2013)
Baltica ( Polyudov Ridge)		Urals	Churochnaya	Stratigraphic position and K/Ar radiometric ages (635-545Ma)									Chumakov (2004)
Cadomia (France)	Unnamed	Brittany	Granville	Brioverian Granville Formation, supposedly glacial lies on dated rocks (Coutances quartz diorite). Probably correlative of Gaskiers.	Sample 7619 collected at Les Roches-Bichues, 12 km NE of Coutances.	Zrn	U-Pb	SIMS	207/206	584	± 4	4	Graindor (1964); Guerrot & Peucat (1990)
Cadomia (NE Bohemian massif, Germany)	Weesenstein-Orellana/ Cadomian	Weesenstein Group of the Saxo-Thuringian zone (Bohemia)	Müglitz	Weesenstein diamictite, Müglitz Formation, Weesenstein Group. This age represent the maximum age constraint on glacigenic strata since U-Pb analyses are done on sedimentaty rocks (i.e. diamictite)	WST1	Zrn	U-Pb	LA-ICP-MS		562	± 5	5	Linnemann et al., (2018)
Cadomia (NE Bohemian massif, Germany)	Weesenstein-Orellana/ Cadomian	Weesenstein Group of the Saxo-Thuringian zone (Bohemia)	Müglitz	Granitoid pebble from the diamictite horizons in the Müglitz Formation. This age represent the maximum age constraint on glacigenic strata since U-Pb analyses are done on sedimentaty rocks (i.e. diamictite)	WeG5	Zrn	U-Pb	LA-ICP-MS		566	± 4	4	Linnemann et al., (2018)
Cadomia (NE Bohemian massif, Germany)	Weesenstein-Orellana/ Cadomian	Weesenstein Group of the Saxo-Thuringian zone (Bohemia)	Müglitz	Granitoid pebble from the diamictite horizons in the Müglitz Formation. This age represent the maximum age constraint on glacigenic strata since U-Pb analyses are done on sedimentaty rocks (i.e. diamictite)	WeG3	Zrn	U-Pb	LA-ICP-MS		572	± 2	2	Linnemann et al., (2018)
Cadomia (NE Bohemian massif, Germany)	Weesenstein-Orellana/ Cadomian	Weesenstein Group of the Saxo-Thuringian zone (Bohemia)	Müglitz	Granitoid pebble from the diamictite horizons in the Müglitz Formation. This age represent the maximum age constraint on glacigenic strata since U-Pb analyses are done on sedimentaty rocks (i.e. diamictite)	WeG2	Zrn	U-Pb	LA-ICP-MS		576	± 7	7	Linnemann et al., (2018)
Cadomia (NE Bohemian massif, Germany)	Weesenstein-Orellana/ Cadomian	Weesenstein Group of the Saxo-Thuringian zone (Bohemia)	Seidewitz	Purpurberg quartzite underlying the Weesenstein diamictite	GWQ1	Zrn	U-Pb	LA-ICP-MS		562	± 5	5	Linnemann et al., (2018)
Cadomia (NE Bohemian massif, Germany)	Weesenstein-Orellana/ Cadomian	Weesenstein Group of the Saxo-Thuringian zone (Bohemia)	Seidewitz	Quartz wacke underlying the Weesenstein diamictite	P-Pur-1n-2-LA10	Zrn	U-Pb	LA-ICP-MS		564	± 5	5	Linnemann et al., (2018)
Cadomia (NE Bohemian massif, Germany)	Weesenstein-Orellana/ Cadomian	Weesenstein Group of the Saxo-Thuringian zone (Bohemia)	Dohna granodiorite	Dohna granodiorite intrusion into the Ediacaran sedimentary units	DGn1/Dohna 1–4	Zrn	U-Pb	LA-ICP-MS		538	± 2	2	Linnemann et al., (2018)
Cadomia (NE Bohemian massif, Germany)	Weesenstein-Orellana/ Cadomian	Clanzschwitz Group of the Saxo-Thuringian zone (Bohemia)	Member 3	Clanzschwitz diamictite	CL1	Zrn	U-Pb	LA-ICP-MS		570	± 8	8	Linnemann et al., (2018)
Cadomia (NE Bohemian massif, Germany)	Weesenstein-Orellana/ Cadomian	Clanzschwitz Group of the Saxo-Thuringian zone (Bohemia)	Member 3	Granitoid pebble from Clanzschwitz diamictite	Cla1n	Zrn	U-Pb	LA-ICP-MS		574	± 5	5	Linnemann et al., (2018)
Cadomia (NE Bohemian massif, Germany)	Weesenstein-Orellana/ Cadomian	Clanzschwitz Group of the Saxo-Thuringian zone (Bohemia)	Member 2	Quartzite underlying the Clanzschwitz diamictite	CL2	Zrn	U-Pb	LA-ICP-MS		565	± 5	5	Linnemann et al., (2018)
Cadomia (NE Bohemian massif, Germany)	Weesenstein-Orellana/ Cadomian	Clanzschwitz Group of the Saxo-Thuringian zone (Bohemia)	Laas granodiorite	Laas granodiorite intrusion into the Ediacaran sedimentary units	Laas1	Zrn	U-Pb	LA-ICP-MS		537	± 5	5	Linnemann et al., (2018)
Cadomia (Central Iberian zone, Spain, Iberia)		Lower Alcudian Group of the southern Central Iberian zone (Iberia)	Orellana	Diamictite matrix, near Orellana. This age represent the maximum age constraint on glacigenic strata	OR1	Zrn	U-Pb	LA-ICP-MS		565	± 4	4	Linnemann et al., (2018)
Kalahari Craton (Western margin, Southern Namibia)	Vingerbreek (Post-Gaskiers)	Nama Group/Schwarzrand Subgroup	Nudaus Formation/Vingerbreek Member	Vingerbreek diamictite collected at the Tierkloof Farm. At this locality the diamictite overlies unconformably the strongly polished and scratched surface of the Kliphoek quartzite . Outcrops of the diamictite occur as patches of variable thickness between few cm up to max 1 m. They are covered by a sandstone layer	Nam 181	Zrn	U-Pb	LA-ICP-MS		598	± 9	9	Hofmann et al., (2015)
Kalahari Craton (Western margin, Southern Namibia)	Vingerbreek (Post-Gaskiers)	Nama Group/Schwarzrand Subgroup	Nudaus Formation/Vingerbreek Member	Vingerbreek diamictite collected at the Tierkloof Farm. At this locality the diamictite overlies unconformably the strongly polished and scratched surface of the Kliphoek quartzite . Outcrops of the diamictite occur as patches of variable thickness between few cm up to max 1 m. They are covered by a sandstone layer	Nam 181	Zrn	U-Pb	LA-ICP-MS		589	± 9	9	Hofmann et al., (2015)
Kalahari Craton (Western margin, Southern Namibia)	Vingerbreek (Post-Gaskiers)	Nama Group/Schwarzrand Subgroup	Nudaus Formation/Vingerbreek Member	Vingerbreek diamictite matrix was collected in section along the Orange river. There, the Vingerbreek Member is build up by sandstones and diamictite that unconformably overlie the Kliphoek quartzite.	Nam 160	Zrn	U-Pb	LA-ICP-MS		594	± 10	10	Hofmann et al., (2015)
Kalahari Craton (Western margin, Southern Namibia)	Vingerbreek (Post-Gaskiers)	Nama Group/Kuibis Subgroup	Zaris Formation/Hoogland (Mooifontein) Member	Nama ash beds underlying the Vingerbreek diamictite	Sample 94-N10B	Zrn	U-Pb	LA-ICP-MS		548.8	± 1	1	Grotzinger et al., (1995)
Kalahari Craton (Western margin, Southern Namibia)	Vingerbreek (Post-Gaskiers)	Nama Group/Schwarzrand Subgroup	Urusis Formation/Spitskop Member	Nama ash beds ovelying the Vingerbreek diamictite	Sample 91-N1	Zrn	U-Pb	LA-ICP-MS		545.1	± 1	1	Grotzinger et al., (1995)
Laurentia (SW Scotland)	Loch na Cille	Dalradian	Loch na Cille	Small laccolithic body of Keratophyre associated with the Tayvallich volcanics at the base of Argyll Group. Tayvallich volcanics are stratigraphically above the Port Askaig Formation at the top of the Argyll Group. Inishowen diamictite lies not far above the dated rock; MacDuff Tillite overlies the Inishown. This age represent the maximum age constraint on glacigenic strata.	Sample 84-49/71-46	Zrn	U-Pb	SIMS	207/206	595	± 4	4	McCay et al. (2006); Halliday et al., (1989)
Laurentia (SW Scotland)	Loch na Cille	Dalradian	Loch na Cille	Tayvallich tuffs. Port Askaig tillite lies below. This age represent the maximum age constraint on glacigenic strata.	X	Zrn	U-Pb	SHRIMP	206/238	601.4	± 4	4	McCay et al. (2006); Dempster et al., (2002)
São Francisco (The Ribeira belt in SE Brazil)			Iporanga	Volcanoclastic/volcanic rock (felsic volcanic unit) from below the Iporanga Formation	IP808	Zrn	U-Pb	SHRIMP	206/238	579	±34	34	Campanhaet al., (2008)
São Francisco (The Ribeira belt in SE Brazil)			Iporanga	Granite pebbles the basal breccia unit within the Iporanga Formation	F203	Zrn	U-Pb	SHRIMP	206/238	593	±15	15	Campanhaet al., (2008)
Tarim		Quruqtagh	Hankalchough	Volcanic bed between the Tereeken and Hankalchough diamictites. This age represent the maximum age constraint on glacigenic strata	2371D (V3)	Zrn	U-Pb	SHRIMP	206/238	615	± 6	6	Xiao et al. (2004); Xu et al., (2009)
Tarim		Quruqtagh	Hankalchough	A tuffaceous bed in the uppermost Zhamoketi Formation between the Tereeken and Hankalchough diamictites. This age represent the maximum age constraint on glacigenic strata	12K71	Zrn	U-Pb	LA-ICP-MS		616.5	± 5.9	5.9	Xiao et al. (2004); He et al., (2014)
Tasmania (N of City of Melbourne Bay, King Island)	Gaskiers (Elatina?)	Kanunnah	Croles Hill	Grime Intrusive Suite/Grassy Group of King Island/Intermediate sills intrude an Elatina-equivalent diamictite (the Cottons Breccia), cap carbonate, and postglacial shale. This glaciation called (the Elatina glaciation) has yet to be dated directly and is believed to be Maronian (Hoffmann et al. (2009) or Gaskiers (Gostin et al., 2010). The Cottons Breccia in Tasmania is now dated at 636.41 ± 0.45…	R009545	Zrn	U-Pb	SHRIMP	206/238	574.7	±3	3	Calver et al., (2004)
Tasmania (Robbins Passage area, north coast of Tasmania)	Gaskiers (Elatina?)	Kanunnah	Croles Hill	Togari Group of northwest Tasmania, a rhyodacite flow (Togari Group of northwest Tasmania) underlies the Croles Hill Diamictite, which is at least partly glaciogenic. No cap carbonate is known from the Croles Hill Diamictite, but in other respects its stratigraphic setting is similar to the Cottons Breccia. If Croles Hill= Cottons, and if Marinoan, then Marinoan much younger than elsewhere. MacGa…	R011510	Zrn	U-Pb	SHRIMP	206/238	582.1	±4.1	4.1	Calver et al., (2004)
(1) Mineral: Bdl: baddeleyite; Zrn: zircon
(2) Method : CA-TIMS: Chemical Abrasion- Thermal Ionization Mass Spectrometry; ID-TIMS : Isotope Dilution-Thermal Ionization Mass Spectrometry; LA-ICP-MS : Laser Ablation Inductively Coupled Plasma Mass Spectrometry; LAM-ICP-MS: Laser Ablation Microprobe- Inductively Coupled Plasma Mass Spectrometry; SHRIMP: Sensitive High Resolution Ion Microprobe; SIMS: Secondary Ion Mass Spectrometry; TIMS: Th…
(2) 206/238: avg. 206Pb/238U date; 207/206: avg. 207Pb/206Pb date; 3D-iso: 3D isochron; conc: conordia age or concordant analyses; up.int: upper intercept; lo.int.: lower intercept; evap: evaporation method
