# Supplementary material
Source: publisher figshare collection journal article supplement (https://gsapubs.figshare.com/ndownloader/files/23319197)
Supplement: Supplementary file 1 [file 23319197 › Table-DR2.xls]

## Sheet: PlotDat55
Source sheet	AZB13	0.286014	0.0400893	0.251743	0.036	0.24193	0.0347165	0.30519	0.0413891	0.330412	0.0443922	0.328153	0.0446614	0.34365	0.0443968	0.370726	0.0448301	0.339976	0.0452036	0.366116	0.0452464	0.352747	0.0451309	0.333627	0.0460092	0.339934	0.0455954	0.350783	0.0465145	0.354345	0.0464965	0.351785	0.0461134	0.344227	0.0470112	0.354762	0.0465468	0.360397	0.0463001	0.356308	0.0469243	0.358683	0.0470873	0.358035	0.0478822	0.363628	0.0482908	0.373266	0.0483714
Plot name	Concordia46	0.310281	0.0431773	0.251743	0.036	0.254222	0.0363229	0.304914	0.0415914	0.330124	0.0446032	0.327894	0.0448435	0.343218	0.0446358	0.370212	0.0451084	0.339632	0.0454432	0.365665	0.0455391	0.352399	0.0453615	0.333375	0.0461778	0.339632	0.0458138	0.350495	0.0467648	0.354031	0.046766	0.351496	0.04635	0.343917	0.0472225	0.354492	0.0467716	0.36008	0.0465328	0.356026	0.0471592	0.358427	0.0473023	0.357759	0.0480832	0.363337	0.0485008	0.37296	0.0486156
Plot Type	1	0.310354	0.0432586	0.25595	0.0365477	0.266635	0.0379317	0.304122	0.0417527	0.329295	0.0447753	0.327157	0.0449825	0.341946	0.044852	0.368684	0.045369	0.33863	0.0456502	0.364331	0.0458094	0.351371	0.0455744	0.33266	0.0462995	0.338758	0.0459981	0.349668	0.046978	0.353121	0.0470011	0.350653	0.046561	0.343037	0.0473783	0.353706	0.0469705	0.359148	0.0467446	0.355205	0.0473675	0.357686	0.047491	0.356962	0.0482482	0.362498	0.0486743	0.372065	0.0488342
1st free col	53	0.312374	0.0438001	0.260171	0.0370956	0.279171	0.0395431	0.302836	0.0418687	0.327946	0.0449038	0.325962	0.0450744	0.339867	0.0450395	0.366174	0.045607	0.336997	0.0458189	0.362141	0.0460522	0.349684	0.0457652	0.331501	0.0463708	0.337334	0.0461433	0.348319	0.0471501	0.351633	0.0471974	0.349272	0.0467421	0.341612	0.0474742	0.352418	0.0471396	0.35762	0.0469313	0.353861	0.0475449	0.356473	0.0476498	0.355665	0.0483728	0.361133	0.0488066	0.370599	0.0490231
Sigma Level	1	0.318183	0.0442032	0.264406	0.0376438	0.291832	0.0411569	0.301091	0.0419361	0.326116	0.0449852	0.32434	0.0451168	0.337037	0.0451932	0.362729	0.0458177	0.334777	0.0459448	0.359138	0.0462626	0.347369	0.0459303	0.329931	0.0463899	0.335401	0.0462455	0.346473	0.0472776	0.349596	0.0473511	0.347381	0.0468898	0.339679	0.0475078	0.350655	0.0472757	0.355526	0.0470894	0.35202	0.0476882	0.354812	0.0477757	0.353905	0.0484535	0.359279	0.0488941	0.36859	0.0491785
Absolute Errs	FALSE	0.315493	0.044248	0.268656	0.0381923	0.304617	0.0427732	0.298935	0.0419532	0.323854	0.0450173	0.322338	0.0451085	0.333535	0.045309	0.358418	0.0459969	0.332031	0.0460244	0.355378	0.0464367	0.344472	0.0460666	0.327991	0.0463562	0.33301	0.0463019	0.344166	0.0473581	0.34705	0.047459	0.345016	0.0470012	0.337292	0.047478	0.348451	0.0473761	0.352905	0.0472157	0.349718	0.0477944	0.352736	0.0478661	0.35173	0.0484882	0.356988	0.0489342	0.366077	0.0492974
Symbol Type	1	0.32033	0.0443926	0.27292	0.0387412	0.317529	0.0443921	0.296426	0.0419194	0.321222	0.0449992	0.320008	0.0450497	0.329456	0.0453835	0.353323	0.0461412	0.328834	0.0460555	0.350937	0.046571	0.34105	0.0461713	0.325735	0.0462707	0.330227	0.0463109	0.341445	0.04739	0.344044	0.0475192	0.342223	0.0470742	0.334515	0.0473858	0.345848	0.0474388	0.349809	0.0473079	0.347001	0.0478616	0.350285	0.0479193	0.349198	0.0484759	0.354321	0.0489261	0.36311	0.0493775
Inverse Plot	FALSE	0.317469	0.0444455	0.277198	0.0392903	0.330569	0.0460135	0.293634	0.0418357	0.318291	0.0449315	0.317415	0.0449421	0.324911	0.0454149	0.347545	0.0462479	0.325273	0.0460373	0.3459	0.0466629	0.337169	0.0462424	0.323225	0.0461357	0.327128	0.0462723	0.33836	0.0473727	0.340637	0.0475304	0.339057	0.0471074	0.331425	0.0472335	0.342897	0.0474626	0.346298	0.047364	0.34392	0.0478884	0.347506	0.0479343	0.346379	0.048417	0.351352	0.0488699	0.359745	0.0494173
Color Plot	TRUE	0.3164	0.0444555	0.28149	0.0398396	0.343738	0.0476374	0.290633	0.0417043	0.315142	0.0448158	0.31463	0.0447886	0.320024	0.0454022	0.341195	0.0463147	0.321445	0.0459703	0.340365	0.0467106	0.332904	0.0462785	0.320528	0.0459548	0.323797	0.0461872	0.334973	0.0473066	0.336895	0.0474925	0.335578	0.0471001	0.328105	0.0470254	0.339655	0.047447	0.342441	0.0473831	0.340536	0.0478743	0.344454	0.0479108	0.34335	0.048313	0.348161	0.048767	0.35605	0.049416
3D plot	FALSE	0.318635	0.0445656	0.285797	0.0403893	0.357037	0.0492638	0.287507	0.0415289	0.31186	0.0446555	0.311728	0.0445933	0.314928	0.0453458	0.334397	0.0463404	0.317455	0.0458564	0.33444	0.0467131	0.328339	0.046279	0.317719	0.045733	0.320326	0.0460578	0.331349	0.0471929	0.332891	0.0474061	0.331856	0.0470524	0.324647	0.0467671	0.336187	0.0473925	0.338313	0.0473647	0.336914	0.0478195	0.341189	0.0478492	0.340193	0.0481668	0.344835	0.0486204	0.352094	0.0493735
Linear	FALSE	0.322813	0.0448622	0.290118	0.0409393	0.370468	0.0508927	0.28434	0.0413142	0.308535	0.0444548	0.308788	0.0443617	0.309762	0.0452473	0.327283	0.0463245	0.313411	0.0456986	0.328241	0.0466706	0.323562	0.0462438	0.314874	0.0454764	0.316808	0.0458877	0.327559	0.0470338	0.328704	0.047273	0.327962	0.0469653	0.321144	0.0464657	0.332558	0.0472999	0.333993	0.0473091	0.333126	0.0477252	0.337773	0.0477508	0.336995	0.0479823	0.341466	0.048434	0.347956	0.0492908
Data Range	BX3:CB24	0.323433	0.0450044	0.294454	0.0414896	IsoLine	IsoLine	0.281218	0.0410662	0.305258	0.0442194	0.305891	0.0440999	0.304668	0.0451092	0.319992	0.0462673	0.309425	0.0455012	0.321888	0.0465836	0.318667	0.0461735	0.31207	0.045192	0.31334	0.0456816	0.323676	0.0468324	0.324413	0.0470958	0.323972	0.0468405	0.317693	0.0461294	0.328841	0.0471712	0.329567	0.0472176	0.329244	0.0475932	0.334273	0.0476174	0.333842	0.0477647	0.338144	0.048213	0.343716	0.0491694
Filled Symbols	FALSE	0.323036	0.0450271	0.298805	0.0420401			0.278228	0.0407914	0.302118	0.0439554	0.303116	0.0438152	0.299784	0.0449355	0.312667	0.04617	0.305603	0.0452696	0.315504	0.0464541	0.313748	0.0460696	0.309385	0.0448874	0.310017	0.045445	0.319777	0.0465927	0.320103	0.0468778	0.319964	0.0466804	0.314386	0.0457674	0.325106	0.0470088	0.32512	0.0470919	0.325345	0.047426	0.330757	0.0474516	0.330821	0.0475198	0.334962	0.0479633	0.339457	0.0490118
ConcAge	TRUE	0.323019	0.0451864	0.30317	0.042591			0.275449	0.0404975	0.2992	0.0436703	0.300539	0.0435153	0.295243	0.0447308	0.305448	0.0460343	0.302052	0.0450101	0.309214	0.0462844	0.308902	0.0459342	0.306891	0.0445711	0.306929	0.0451844	0.315937	0.0463194	0.315859	0.0466233	0.316016	0.0464881	0.311315	0.0453896	0.321427	0.0468158	0.320738	0.0469343	0.321504	0.0472269	0.327294	0.0472567	0.328014	0.0472544	0.332004	0.0476917	0.33526	0.0488208
ConcSwap	FALSE	0.327975	0.0454411	0.30755	0.0431421			0.272959	0.0401925	0.296585	0.0433717	0.298229	0.0432084	0.29117	0.0445007	0.298477	0.0458631	0.298867	0.0447299	0.303141	0.0460778	0.304222	0.0457697	0.304656	0.0442516	0.30416	0.0449069	0.312231	0.0460176	0.311761	0.0463374	0.312204	0.0462674	0.308564	0.0450062	0.317876	0.0465961	0.316508	0.046748	0.317797	0.0469998	0.323951	0.0470365	0.325498	0.0469756	0.329353	0.0474057	0.331209	0.0486004
1st Symbol-row	1	0.328499	0.0454585	0.311944	0.0436935			0.270825	0.0398847	0.294343	0.0430678	0.296249	0.0429029	0.287675	0.0442515	0.29189	0.0456595	0.296136	0.0444365	0.297402	0.0458385	0.299801	0.0455795	0.302742	0.0439377	0.301786	0.0446202	0.308731	0.0456934	0.307891	0.0460255	0.308603	0.0460225	0.306207	0.0446277	0.314522	0.046354	0.312511	0.0465366	0.314294	0.0467491	0.320793	0.0467952	0.323341	0.046691	0.32708	0.047113	0.327382	0.0483548
		0.32834	0.045787	0.316353	0.0442452			0.269106	0.0395824	0.292536	0.0427669	0.294655	0.0426071	0.284853	0.04399	0.285815	0.0454276	0.293932	0.044138	0.29211	0.0455711	0.295723	0.0453672	0.3012	0.0436379	0.299871	0.0443319	0.305504	0.045353	0.304323	0.0456937	0.305283	0.0457583	0.304308	0.0442644	0.311429	0.046094	0.308825	0.0463043	0.311065	0.0464796	0.317882	0.0465376	0.321602	0.0464085	0.325247	0.0468217	0.323853	0.0480887
		0.333465	0.0459551	0.320777	0.0447973			0.267847	0.039294	0.291213	0.0424772	0.293489	0.042329	0.282783	0.0437233	0.28037	0.0451718	0.292317	0.0438425	0.287366	0.0452807	0.292068	0.0451369	0.300073	0.0433604	0.298468	0.04405	0.302615	0.045003	0.301128	0.0453486	0.302309	0.0454798	0.302919	0.0439263	0.308658	0.0458214	0.305522	0.0460554	0.308172	0.0461967	0.315275	0.0462686	0.320329	0.0461358	0.323905	0.0465397	0.320692	0.0478073
		0.33867	0.0467655	0.325216	0.0453496			0.267084	0.0390272	0.29041	0.0422066	0.292783	0.0420763	0.281519	0.0434587	0.27566	0.0448972	0.291334	0.043558	0.283265	0.044973	0.288908	0.0448932	0.299391	0.0431128	0.297616	0.0437822	0.300119	0.0446503	0.298366	0.0449967	0.299738	0.0451925	0.302079	0.0436226	0.306263	0.0455413	0.302667	0.045795	0.305672	0.0459058	0.313021	0.0459936	0.319556	0.0458802	0.32309	0.0462747	0.317959	0.0475161
		0.343226	0.0471623	0.32967	0.0459022			0.266837	0.0387895	0.290149	0.0419625	0.292556	0.0418559	0.281097	0.0432034	0.271779	0.0446091	0.29101	0.0432924	0.279884	0.044654	0.286304	0.0446408	0.299173	0.0429018	0.297337	0.0435357	0.298065	0.0443017	0.296092	0.0446449	0.29762	0.044902	0.30181	0.0433615	0.304291	0.0452593	0.300314	0.045528	0.303612	0.0456126	0.311165	0.0457178	0.319304	0.0456487	0.322825	0.0460339	0.315708	0.0472208
		0.342714	0.0473043	0.334139	0.046455			0.267114	0.0385872	0.290437	0.0417515	0.292814	0.0416737	0.281529	0.0429644	0.2688	0.0443131	0.291354	0.0430528	0.277291	0.04433	0.284306	0.0443846	0.299425	0.0427332	0.297638	0.0433174	0.296492	0.0439641	0.294351	0.0443002	0.295997	0.0446139	0.30212	0.0431502	0.30278	0.0449809	0.29851	0.0452597	0.302035	0.0453228	0.309744	0.0454466	0.31958	0.0454478	0.323115	0.0458238	0.313982	0.0469272
		0.344478	0.0478825	0.338623	0.0470082			0.267906	0.0384258	0.291267	0.0415794	0.293551	0.0415348	0.282801	0.0427482	0.266783	0.0440149	0.292356	0.0428459	0.275536	0.0440071	0.282954	0.0441295	0.30014	0.0426115	0.298513	0.0431331	0.295432	0.0436439	0.293175	0.0439692	0.294901	0.0443339	0.303	0.0429945	0.301759	0.0447114	0.297289	0.0449952	0.300969	0.045042	0.308784	0.0451853	0.320378	0.0452827	0.323955	0.0456503	0.312816	0.0466409
		IsoLine	IsoLine	0.343121	0.0475617			0.269192	0.0383099	0.292615	0.0414509	0.294747	0.0414428	0.284881	0.0425606	0.265766	0.0437205	0.293989	0.0426772	0.274653	0.0436918	0.282274	0.0438807	0.301299	0.0425402	0.299936	0.0429878	0.294904	0.0433474	0.292588	0.0436583	0.294352	0.0440673	0.304425	0.0428985	0.301249	0.0444561	0.296676	0.0447397	0.300436	0.0447757	0.308304	0.044939	0.321674	0.0451581	0.32532	0.045518	0.312231	0.0463675
				0.347635	0.0481155			0.270937	0.0382424	0.294445	0.0413695	0.296368	0.0414004	0.28771	0.0424069	0.26577	0.0434354	0.296209	0.0425513	0.274658	0.0433901	0.282278	0.0436428	0.30287	0.0425211	0.301869	0.0428856	0.29492	0.0430804	0.292602	0.0433736	0.294361	0.0438195	0.306358	0.042865	0.301259	0.0442199	0.296683	0.0444983	0.300446	0.0445291	0.308314	0.0447124	0.323434	0.0450774	0.327173	0.0454306	0.31224	0.0461123
				0.352165	0.0486695			0.273093	0.0382254	0.296707	0.0413374	0.29837	0.0414087	0.291212	0.0422912	0.266793	0.0431652	0.298955	0.0424717	0.275553	0.0431079	0.282968	0.0434205	0.304809	0.0425548	0.30426	0.0428292	0.295479	0.0428481	0.293216	0.0431207	0.294929	0.0435951	0.308746	0.0428947	0.301788	0.0440076	0.297308	0.0442755	0.300999	0.044307	0.308814	0.0445101	0.325609	0.0450427	0.329464	0.0453904	0.312842	0.0458803
				0.356709	0.0492239			0.275601	0.0382592	0.29934	0.0413555	0.3007	0.0414675	0.295291	0.0422167	0.268817	0.0429153	0.302152	0.0424406	0.277319	0.0428507	0.284329	0.0432182	0.307065	0.0426403	0.307043	0.0428202	0.296569	0.042655	0.294418	0.0429044	0.296043	0.0433986	0.311522	0.042987	0.302828	0.0438231	0.298541	0.0440757	0.302084	0.0441136	0.309794	0.0443359	0.328141	0.045055	0.332131	0.0453985	0.314026	0.0456761
				0.361269	0.0497785			0.278394	0.0383429	0.30227	0.0414232	0.303293	0.0415751	0.299836	0.0421853	0.271802	0.0426904	0.305713	0.0424587	0.279922	0.0426236	0.286335	0.0430398	0.309575	0.0427753	0.310142	0.0428588	0.298171	0.0425048	0.296185	0.042729	0.297683	0.0432338	0.314612	0.0431393	0.304357	0.0436701	0.300357	0.0439029	0.30368	0.0439529	0.311234	0.0441932	0.33096	0.045114	0.3351	0.0454548	0.315768	0.0455035
				0.365844	0.0503334			0.281394	0.0384742	0.30542	0.0415389	0.306078	0.0417286	0.304723	0.042198	0.275689	0.042495	0.309541	0.0425257	0.283312	0.0424308	0.288947	0.0428887	0.312272	0.0429562	0.313473	0.042944	0.300252	0.0424006	0.298482	0.0425979	0.299817	0.0431039	0.317932	0.0433474	0.306345	0.0435516	0.30272	0.0437604	0.305756	0.0438278	0.313107	0.0440848	0.333989	0.045218	0.338291	0.0455576	0.318034	0.045366
				0.370434	0.0508887			0.28452	0.0386496	0.308701	0.0416992	0.30898	0.0419239	0.309819	0.0422544	0.280404	0.0423328	0.313531	0.0426397	0.287422	0.0422763	0.292114	0.0427679	0.315081	0.0431779	0.316944	0.0430734	0.302772	0.0423442	0.301264	0.0425136	0.302402	0.0430115	0.32139	0.0436057	0.308755	0.0434699	0.305586	0.0436508	0.308272	0.0437409	0.315376	0.0440128	0.337146	0.0453642	0.341617	0.0457042	0.320781	0.0452663
				0.37504	0.0514442			0.287688	0.0388643	0.312026	0.0418999	0.31192	0.0421556	0.314985	0.0423529	0.285853	0.042207	0.317574	0.0427975	0.292173	0.0421629	0.295775	0.0426798	0.317926	0.0434346	0.320462	0.0432434	0.305683	0.0423369	0.304479	0.0424778	0.305389	0.0429582	0.324893	0.043907	0.311539	0.0434265	0.308897	0.0435765	0.311178	0.0436938	0.317997	0.0439786	0.340344	0.0455486	0.344986	0.0458906	0.323954	0.0452062
				0.379661	0.052			0.290809	0.0391124	0.315304	0.0421353	0.314817	0.0424173	0.320079	0.042491	0.291933	0.0421201	0.321561	0.0429949	0.297472	0.042093	0.299858	0.042626	0.32073	0.043719	0.32393	0.0434496	0.308926	0.0423787	0.308062	0.0424912	0.308719	0.0429453	0.328345	0.0442433	0.314643	0.0434224	0.31259	0.0435388	0.314419	0.0436875	0.32092	0.0439829	0.343497	0.0457662	0.348308	0.0461117	0.327493	0.0451869
				0.379661	0.052			0.2938	0.0393871	0.318444	0.0423993	0.317592	0.042702	0.324963	0.0426647	0.298523	0.0420737	0.325383	0.0432265	0.303216	0.0420678	0.304284	0.0426077	0.323416	0.0440236	0.327253	0.0436862	0.312441	0.0424689	0.311944	0.0425535	0.312328	0.0429728	0.331651	0.0446053	0.318006	0.0434575	0.316593	0.0435385	0.31793	0.043722	0.324086	0.0440255	0.346518	0.0460111	0.351491	0.0463614	0.331328	0.0452088
				IsoLine	IsoLine			0.296578	0.039681	0.321362	0.0426844	0.32017	0.0430019	0.329504	0.0428694	0.305495	0.0420688	0.328934	0.0434859	0.309293	0.0420878	0.308966	0.0426251	0.32591	0.0443399	0.330342	0.0439468	0.316157	0.0426056	0.31605	0.0426635	0.316146	0.0430404	0.334722	0.0449832	0.321563	0.0435313	0.320827	0.0435756	0.321644	0.0437967	0.327435	0.0441057	0.349325	0.0462766	0.354448	0.0466329	0.335384	0.0452716
								0.299068	0.0399861	0.323977	0.042983	0.32248	0.0433088	0.333577	0.0430995	0.312715	0.0421054	0.332119	0.0437661	0.315584	0.0421527	0.313814	0.042678	0.328144	0.0446594	0.333111	0.0442242	0.320002	0.0427863	0.320299	0.0428191	0.320097	0.0431466	0.337473	0.0453666	0.325245	0.0436422	0.32521	0.0436493	0.325488	0.0439101	0.330902	0.044222	0.351841	0.0465554	0.357099	0.046919	0.339584	0.0453739
								0.301202	0.0402939	0.326219	0.0432869	0.324459	0.0436144	0.337072	0.0433487	0.320041	0.0421829	0.33485	0.0440595	0.321968	0.0422613	0.318733	0.0427653	0.330059	0.0449733	0.335485	0.044511	0.323902	0.0430073	0.32461	0.0430172	0.324106	0.0432894	0.339831	0.0457451	0.32898	0.0437881	0.329658	0.0437582	0.329388	0.0440601	0.334418	0.0443719	0.353998	0.0468399	0.359372	0.0472116	0.343844	0.0455137
								0.302922	0.0405961	0.328026	0.0435878	0.326053	0.0439102	0.339894	0.0436102	0.327331	0.0422997	0.337054	0.044358	0.32832	0.0424112	0.323627	0.0428852	0.3316	0.0452731	0.337399	0.0447993	0.327781	0.0432645	0.328898	0.043254	0.328094	0.043466	0.341729	0.0461083	0.332696	0.0439662	0.334083	0.0439002	0.333268	0.0442437	0.337916	0.0445527	0.355737	0.0471224	0.361205	0.0475029	0.348082	0.0456885
								0.30418	0.0408846	0.329349	0.0438775	0.32722	0.0441882	0.341964	0.0438769	0.334443	0.0424535	0.338669	0.0446536	0.334517	0.0425998	0.328402	0.0430356	0.332728	0.0455506	0.338802	0.0450811	0.331564	0.0435528	0.333079	0.0435248	0.331984	0.0436731	0.343118	0.0464464	0.33632	0.044173	0.338399	0.0440725	0.337051	0.0444573	0.341327	0.0447607	0.357011	0.0473952	0.362547	0.0477849	0.352216	0.0458946
								0.304943	0.0411513	0.330152	0.0441481	0.327926	0.0444409	0.343228	0.0441415	0.341238	0.0426414	0.339652	0.044938	0.340438	0.0428233	0.332964	0.0432134	0.333409	0.0457982	0.339655	0.045349	0.335176	0.0438665	0.337072	0.0438245	0.335699	0.0439064	0.343958	0.0467502	0.339781	0.0444045	0.342523	0.0442718	0.340665	0.0446968	0.344586	0.044992	0.357784	0.0476508	0.363362	0.04805	0.356164	0.0461282
								0.30519	0.0413891	0.330412	0.0443922	0.328153	0.0446614	0.34365	0.0443968	0.347585	0.0428596	0.339976	0.0452036	0.345967	0.0430773	0.337224	0.0434151	0.333627	0.0460092	0.339934	0.0455954	0.338547	0.0441996	0.3408	0.0441471	0.339168	0.0441616	0.344227	0.0470112	0.343012	0.0446562	0.346374	0.0444943	0.344039	0.0449575	0.347627	0.0452421	0.358035	0.0478822	0.363628	0.0482908	0.359851	0.0463847
																0.353359	0.0431041			0.350997	0.0433569	0.341099	0.0436369					0.341613	0.0445457	0.34419	0.0444864	0.342323	0.0444336			0.345951	0.0449231	0.349877	0.0447354	0.347108	0.0452344	0.350393	0.045506					0.363205	0.0466592
																0.358449	0.0433699			0.35543	0.0436566	0.344515	0.0438745					0.344312	0.0448979	0.347176	0.0448358	0.345102	0.0447172			0.34854	0.0452002	0.352963	0.0449907	0.349811	0.045522	0.35283	0.0457787					0.366159	0.0469461
																0.362755	0.0436519			0.35918	0.0439707	0.347404	0.0441231					0.346593	0.0452494	0.3497	0.0451885	0.347452	0.0450068			0.350729	0.0454819	0.355574	0.0452551	0.352096	0.0458148	0.35489	0.0460548					0.368657	0.0472401
																0.366194	0.0439447			0.362174	0.044293	0.349711	0.0443781					0.348411	0.0455933	0.351713	0.0455375	0.349327	0.0452968			0.352475	0.0457628	0.357657	0.0455234	0.353919	0.046107	0.356532	0.046329					0.370651	0.0475352
																0.368698	0.0442425			0.364354	0.0446173	0.35139	0.0446343					0.34973	0.045923	0.353175	0.0458762	0.35069	0.0455816			0.353744	0.0460374	0.359174	0.0457904	0.355244	0.046393	0.357726	0.0465959					0.3721	0.0478259
																0.370218	0.0445396			0.365676	0.0449372	0.352408	0.0448869					0.350526	0.0462321	0.354058	0.046198	0.351515	0.0458555			0.354511	0.0463005	0.360093	0.046051	0.356046	0.0466672	0.358448	0.0468503					0.372978	0.0481065
																0.370726	0.0448301			0.366116	0.0452464	0.352747	0.0451309					0.350783	0.0465145	0.354345	0.0464965	0.351785	0.0461134			0.354762	0.0465468	0.360397	0.0463001	0.356308	0.0469243	0.358683	0.0470873					0.373266	0.0483714
[truncated: 2 more columns]

## Sheet: PlotDat56
Source sheet	AZB13	0.310281	0.0431773	0.292236	0.0411569	0.305042	0.0427732	0.317974	0.0443921	0.331034	0.0460135	0.344224	0.0476374	0.357544	0.0492638	0.370996	0.0508927	0.282745	0.04	0.283214	0.04	0.282279	0.04	0.279171	0.0395431	0.330412	0.0443922	0.328153	0.0446614	0.34365	0.0443968	0.370726	0.0448301	0.339976	0.0452036	0.366116	0.0452464	0.352747	0.0451309	0.333627	0.0460092	0.339934	0.0455954	0.350783	0.0465145	0.354345	0.0464965	0.351785	0.0461134
Plot name	Concordia47	0.310354	0.0432586	0.29222	0.0411724	0.305024	0.0427894	0.317956	0.0444088	0.331015	0.0460308	0.344204	0.0476554	0.357523	0.0492824	0.370975	0.050912	0.282745	0.04	0.285703	0.0403171	0.282745	0.0400597	0.291832	0.0411569	0.330205	0.0445728	0.327966	0.0448179	0.343341	0.0446	0.370212	0.0451084	0.339729	0.0454079	0.365665	0.0455391	0.352399	0.0453615	0.333445	0.0461546	0.339717	0.0457819	0.350495	0.0467648	0.354031	0.046766	0.351496	0.04635
Plot Type	1	0.312374	0.0438001	0.292172	0.0411866	0.304974	0.0428042	0.317903	0.0444242	0.33096	0.0460468	0.344146	0.0476719	0.357463	0.0492995	0.370912	0.0509296	0.285703	0.0403774	0.288668	0.040694	0.285703	0.0404377	0.304617	0.0427732	0.32961	0.0447263	0.327437	0.0449441	0.34243	0.0447876	0.368684	0.045369	0.339011	0.0455896	0.364331	0.0458094	0.351371	0.0455744	0.332931	0.0462669	0.33909	0.0459447	0.349668	0.046978	0.353121	0.0470011	0.350653	0.046561
1st free col	69	0.318183	0.0442032	0.292097	0.0411985	0.304895	0.0428165	0.31782	0.044437	0.330873	0.04606	0.344056	0.0476856	0.357369	0.0493137	0.370814	0.0509443	0.288668	0.0407549	0.29164	0.0410711	0.288668	0.0408158	0.317529	0.0443921	0.328638	0.0448495	0.326575	0.0450375	0.340934	0.0449559	0.366174	0.045607	0.337835	0.0457452	0.362141	0.0460522	0.349684	0.0457652	0.332096	0.0463439	0.338065	0.0460807	0.348319	0.0471501	0.351633	0.0471974	0.349272	0.0467421
Sigma Level	1	0.315493	0.044248	0.292	0.0412069	0.304793	0.0428253	0.317714	0.0444461	0.330762	0.0460695	0.343939	0.0476954	0.357247	0.0493239	0.370687	0.0509548	0.29164	0.0411326	0.294618	0.0414483	0.29164	0.041194	0.330569	0.0460135	0.327309	0.0449403	0.325397	0.0450963	0.338882	0.0451018	0.362729	0.0458177	0.336224	0.0458717	0.359138	0.0462626	0.347369	0.0459303	0.330954	0.0463842	0.336661	0.0461872	0.346473	0.0472776	0.349596	0.0473511	0.347381	0.0468898
Absolute Errs	FALSE	0.32033	0.0443926	0.291889	0.0412113	0.304677	0.0428299	0.317592	0.0444509	0.330635	0.0460745	0.343807	0.0477006	0.357109	0.0493292	0.370543	0.0509603	0.294618	0.0415104	0.297604	0.0418257	0.294618	0.0415724	0.343738	0.0476374	0.325649	0.0449967	0.323927	0.0451193	0.336314	0.0452224	0.358418	0.0459969	0.33421	0.0459665	0.355378	0.0464367	0.344472	0.0460666	0.32953	0.046387	0.334907	0.0462621	0.344166	0.0473581	0.34705	0.047459	0.345016	0.0470012
Symbol Type	1	0.317469	0.0444455	0.291774	0.0412113	0.304557	0.0428299	0.317466	0.0444509	0.330503	0.0460745	0.343668	0.0477006	0.356965	0.0493292	0.370392	0.0509603	0.297604	0.0418883	0.300596	0.0422032	0.297604	0.0419509	0.357037	0.0492638	0.323689	0.0450177	0.322192	0.0451061	0.33328	0.0453152	0.353323	0.0461412	0.331831	0.046028	0.350937	0.046571	0.34105	0.0461713	0.32785	0.0463521	0.332836	0.046304	0.341445	0.04739	0.344044	0.0475192	0.342223	0.0470742
Inverse Plot	FALSE	0.3164	0.0444555	0.291663	0.0412069	0.304441	0.0428253	0.317344	0.0444461	0.330376	0.0460695	0.343536	0.0476954	0.356826	0.0493239	0.370248	0.0509548	0.300596	0.0422664	0.303595	0.0425808	0.300596	0.0423296	0.370468	0.0508927	0.321469	0.0450029	0.320227	0.045057	0.329839	0.0453786	0.347545	0.0462479	0.329134	0.0460547	0.3459	0.0466629	0.337169	0.0462424	0.325947	0.0462804	0.330489	0.0463121	0.33836	0.0473727	0.340637	0.0475304	0.339057	0.0471074
Color Plot	TRUE	0.318635	0.0445656	0.291566	0.0411985	0.304339	0.0428165	0.317238	0.044437	0.330264	0.04606	0.343419	0.0476856	0.356705	0.0493137	0.370121	0.0509443	0.303595	0.0426446	0.306601	0.0429586	0.303595	0.0427084	IsoLine	IsoLine	0.319031	0.0449525	0.31807	0.0449728	0.326058	0.0454113	0.341195	0.0463147	0.326172	0.0460463	0.340365	0.0467106	0.332904	0.0462785	0.323859	0.0461731	0.327911	0.0462861	0.334973	0.0473066	0.336895	0.0474925	0.335578	0.0471001
3D plot	FALSE	0.322813	0.0448622	0.291491	0.0411866	0.30426	0.0428042	0.317155	0.0444242	0.330178	0.0460468	0.343329	0.0476719	0.35661	0.0492995	0.370023	0.0509296	0.306601	0.0430229	0.309615	0.0433365	0.306601	0.0430873			0.316422	0.0448676	0.315762	0.0448553	0.322011	0.0454126	0.334397	0.0463404	0.323002	0.0460029	0.33444	0.0467131	0.328339	0.046279	0.321625	0.0460324	0.325152	0.0462267	0.331349	0.0471929	0.332891	0.0474061	0.331856	0.0470524
Linear	FALSE	0.323433	0.0450044	0.291443	0.0411724	0.30421	0.0427894	0.317102	0.0444088	0.330123	0.0460308	0.343271	0.0476554	0.35655	0.0492824	0.36996	0.050912	0.309615	0.0434014	0.312635	0.0437145	0.309615	0.0434663			0.313694	0.0447499	0.31335	0.0447067	0.317776	0.0453825	0.327283	0.0463245	0.319685	0.0459253	0.328241	0.0466706	0.323562	0.0462438	0.319289	0.045861	0.322266	0.046135	0.327559	0.0470338	0.328704	0.047273	0.327962	0.0469653
Data Range	BX4:CB23	0.323036	0.0450271	0.291427	0.0411569	0.304192	0.0427732	0.317084	0.0443921	0.330104	0.0460135	0.343252	0.0476374	0.35653	0.0492638	0.369939	0.0508927	0.312635	0.04378	0.315661	0.0440927	0.312635	0.0438455			0.3109	0.0446014	0.310879	0.0445299	0.313436	0.0453216	0.319992	0.0462673	0.316288	0.0458151	0.321888	0.0465836	0.318667	0.0461735	0.316898	0.0456622	0.31931	0.0460127	0.323676	0.0468324	0.324413	0.0470958	0.323972	0.0468405
Filled Symbols	FALSE	0.323019	0.0451864	0.291443	0.0411414	0.30421	0.0427571	0.317102	0.0443754	0.330123	0.0459961	0.343271	0.0476194	0.35655	0.0492452	0.36996	0.0508735	0.315661	0.0441588	0.318695	0.044471	0.315661	0.0442249			0.308093	0.0444253	0.308398	0.0443283	0.309076	0.0452311	0.312667	0.04617	0.312874	0.0456744	0.315504	0.0464541	0.313748	0.0460696	0.314496	0.04544	0.316341	0.0458622	0.319777	0.0465927	0.320103	0.0468778	0.319964	0.0466804
ConcAge	TRUE	0.327975	0.0454411	0.291491	0.0411272	0.30426	0.0427423	0.317155	0.04436	0.330178	0.0459802	0.343329	0.0476028	0.35661	0.049228	0.370023	0.0508558	0.318695	0.0445377	0.321736	0.0448495	0.318695	0.0446044			0.305329	0.0442249	0.305955	0.044106	0.304779	0.0451127	0.305448	0.0460343	0.309512	0.0455059	0.309214	0.0462844	0.308902	0.0459342	0.312132	0.0451985	0.313416	0.0456865	0.315937	0.0463194	0.315859	0.0466233	0.316016	0.0464881
ConcSwap	FALSE	0.328499	0.0454585	0.291566	0.0411153	0.304339	0.04273	0.317238	0.0443472	0.330264	0.0459669	0.343419	0.0475891	0.356705	0.0492138	0.370121	0.0508411	0.321736	0.0449167	0.324784	0.0452281	0.321736	0.044984			0.302662	0.0440041	0.303597	0.0438671	0.300631	0.0449688	0.298477	0.0458631	0.306266	0.045313	0.303141	0.0460778	0.304222	0.0457697	0.30985	0.0449427	0.310593	0.045489	0.312231	0.0460176	0.311761	0.0463374	0.312204	0.0462674
1st Symbol-row	1	0.32834	0.045787	0.291663	0.0411069	0.304441	0.0427212	0.317344	0.0443381	0.330376	0.0459574	0.343536	0.0475793	0.356826	0.0492037	0.370248	0.0508306	0.324784	0.0452959	0.327839	0.0456068	0.324784	0.0453637			0.300143	0.0437672	0.301371	0.0436164	0.296711	0.0448021	0.29189	0.0456595	0.3032	0.0450993	0.297402	0.0458385	0.299801	0.0455795	0.307697	0.0446773	0.307927	0.0452735	0.308731	0.0456934	0.307891	0.0460255	0.308603	0.0460225
		0.333465	0.0459551	0.291774	0.0411025	0.304557	0.0427166	0.317466	0.0443333	0.330503	0.0459525	0.343668	0.0475742	0.356965	0.0491984	0.370392	0.0508251	0.327839	0.0456752	0.330901	0.0459857	0.327839	0.0457436			0.297821	0.0435189	0.29932	0.0433588	0.293095	0.044616	0.285815	0.0454276	0.300372	0.044869	0.29211	0.0455711	0.295723	0.0453672	0.305712	0.0444077	0.305469	0.0450442	0.305504	0.045353	0.304323	0.0456937	0.305283	0.0457583
		0.33867	0.0467655	0.291889	0.0411025	0.304677	0.0427166	0.317592	0.0443333	0.330635	0.0459525	0.343807	0.0475742	0.357109	0.0491984	0.370543	0.0508251	0.330901	0.0460547	0.33397	0.0463647	0.330901	0.0461236			0.295741	0.0432638	0.297484	0.0430992	0.289855	0.0444139	0.28037	0.0451718	0.29784	0.0446267	0.287366	0.0452807	0.292068	0.0451369	0.303936	0.0441389	0.303267	0.0448056	0.302615	0.045003	0.301128	0.0453486	0.302309	0.0454798
		0.343226	0.0471623	0.292	0.0411069	0.304793	0.0427212	0.317714	0.0443381	0.330762	0.0459574	0.343939	0.0475793	0.357247	0.0492037	0.370687	0.0508306	0.33397	0.0464342	0.337047	0.0467438	0.33397	0.0465038			0.293945	0.0430071	0.295898	0.0428427	0.287054	0.0442	0.27566	0.0448972	0.295651	0.044377	0.283265	0.044973	0.288908	0.0448932	0.302402	0.0438763	0.301364	0.0445624	0.300119	0.0446503	0.298366	0.0449967	0.299738	0.0451925
		0.342714	0.0473043	0.292097	0.0411153	0.304895	0.04273	0.31782	0.0443472	0.330873	0.0459669	0.344056	0.0475891	0.357369	0.0492138	0.370814	0.0508411	0.337047	0.046814	0.34013	0.0471231	0.337047	0.0468841			0.292466	0.0427537	0.294594	0.0425943	0.284745	0.0439782	0.271779	0.0446091	0.293848	0.0441248	0.279884	0.044654	0.286304	0.0446408	0.301141	0.043625	0.299798	0.0443192	0.298065	0.0443017	0.296092	0.0446449	0.29762	0.044902
		IsoLine	IsoLine	0.292172	0.0411272	0.304974	0.0427423	0.317903	0.04436	0.33096	0.0459802	0.344146	0.0476028	0.357463	0.049228	0.370912	0.0508558	0.34013	0.0471938	0.34322	0.0475025	0.34013	0.0472645			0.291335	0.0425086	0.293596	0.0423588	0.282974	0.0437529	0.2688	0.0443131	0.292466	0.0438749	0.277291	0.04433	0.284306	0.0443846	0.300177	0.0433899	0.298598	0.0440808	0.296492	0.0439641	0.294351	0.0443002	0.295997	0.0446139
				0.29222	0.0411414	0.305024	0.0427571	0.317956	0.0443754	0.331015	0.0459961	0.344204	0.0476194	0.357523	0.0492452	0.370975	0.0508735	0.34322	0.0475738	0.346318	0.0478821	0.34322	0.0476451			0.290572	0.0422765	0.292925	0.0421408	0.281775	0.0435286	0.266783	0.0440149	0.291532	0.0436324	0.275536	0.0440071	0.282954	0.0441295	0.299528	0.0431755	0.297788	0.0438518	0.295432	0.0436439	0.293175	0.0439692	0.294901	0.0443339
				0.292236	0.0411569	0.305042	0.0427732	0.317974	0.0443921	0.331034	0.0460135	0.344224	0.0476374	0.357544	0.0492638	0.370996	0.0508927	0.346318	0.0479539	0.349422	0.0482617	0.346318	0.0480258			0.290192	0.0420619	0.292592	0.0419446	0.281171	0.0433096	0.265766	0.0437205	0.291065	0.0434018	0.274653	0.0436918	0.282274	0.0438807	0.299208	0.042986	0.297384	0.0436367	0.294904	0.0433474	0.292588	0.0436583	0.294352	0.0440673
				ConcTikEll	ConcTikEll	ConcTikEll	ConcTikEll	ConcTikEll	ConcTikEll	ConcTikEll	ConcTikEll	ConcTikEll	ConcTikEll	ConcTikEll	ConcTikEll	ConcTikEll	ConcTikEll	0.349422	0.0483342	0.352534	0.0486416	0.349422	0.0484067			0.290204	0.041869	0.292606	0.041774	0.281175	0.0431001	0.26577	0.0434354	0.291074	0.0431877	0.274658	0.0433901	0.282278	0.0436428	0.299222	0.0428251	0.297393	0.0434398	0.29492	0.0430804	0.292602	0.0433736	0.294361	0.0438195
																		0.352534	0.0487146	0.355653	0.0490215	0.352534	0.0487877			0.290606	0.0417016	0.292965	0.0416322	0.281787	0.0429042	0.266793	0.0431652	0.291557	0.0429942	0.275553	0.0431079	0.282968	0.0434205	0.299571	0.042696	0.297816	0.0432647	0.295479	0.0428481	0.293216	0.0431207	0.294929	0.0435951
																		0.355653	0.0490952	0.358779	0.0494016	0.355653	0.0491688			0.291392	0.0415629	0.293662	0.0415222	0.282993	0.0427258	0.268817	0.0429153	0.292507	0.0428251	0.277319	0.0428507	0.284329	0.0432182	0.300248	0.0426011	0.298644	0.0431149	0.296569	0.042655	0.294418	0.0429044	0.296043	0.0433986
																		0.358779	0.0494759	0.361913	0.0497819	0.358779	0.0495501			0.292545	0.0414556	0.294684	0.0414459	0.284772	0.0425683	0.271802	0.0426904	0.293904	0.0426838	0.279922	0.0426236	0.286335	0.0430398	0.301238	0.0425423	0.299862	0.0429934	0.298171	0.0425048	0.296185	0.042729	0.297683	0.0432338
																		0.361913	0.0498567	0.365053	0.0501623	0.361913	0.0499315			0.294043	0.0413818	0.296012	0.0414049	0.287087	0.0424348	0.275689	0.042495	0.295721	0.0425728	0.283312	0.0424308	0.288947	0.0428887	0.302524	0.0425207	0.301444	0.0429025	0.300252	0.0424006	0.298482	0.0425979	0.299817	0.0431039
																		0.365053	0.0502377	0.368201	0.0505428	0.365053	0.0503131			0.295857	0.041343	0.297618	0.0414	0.289895	0.0423278	0.280404	0.0423328	0.297923	0.0424945	0.287422	0.0422763	0.292114	0.0427679	0.30408	0.0425368	0.303362	0.0428439	0.302772	0.0423442	0.301264	0.0425136	0.302402	0.0430115
																		0.368201	0.0506188	0.371356	0.0509234	0.368201	0.0506947			0.297952	0.0413399	0.299472	0.0414312	0.293141	0.0422495	0.285853	0.042207	0.300467	0.0424503	0.292173	0.0421629	0.295775	0.0426798	0.305876	0.0425902	0.305576	0.0428189	0.305683	0.0423369	0.304479	0.0424778	0.305389	0.0429582
																		0.371356	0.051	0.371992	0.051	0.370724	0.051			0.300287	0.0413726	0.301538	0.0414981	0.29676	0.0422013	0.291933	0.0421201	0.303303	0.0424411	0.297472	0.042093	0.299858	0.042626	0.307877	0.04268	0.308045	0.0428278	0.308926	0.0423787	0.308062	0.0424912	0.308719	0.0429453
																		0.371356	0.051	ConcBand	ConcBand	ConcBand	ConcBand			0.302817	0.0414404	0.303776	0.0415991	0.300684	0.0421843	0.298523	0.0420737	0.306377	0.0424671	0.303216	0.0420678	0.304284	0.0426077	0.310043	0.0428043	0.31072	0.0428706	0.312441	0.0424689	0.311944	0.0425535	0.312328	0.0429728
																		IsoLine	IsoLine							0.305491	0.041542	0.306142	0.0417325	0.304835	0.0421988	0.305495	0.0420688	0.309628	0.0425277	0.309293	0.0420878	0.308966	0.0426251	0.312334	0.0429607	0.313549	0.0429464	0.316157	0.0426056	0.31605	0.0426635	0.316146	0.0430404
																										0.308259	0.0416754	0.30859	0.0418956	0.309133	0.0422444	0.312715	0.0421054	0.312993	0.0426219	0.315584	0.0421527	0.313814	0.042678	0.314703	0.0431462	0.316477	0.0430537	0.320002	0.0427863	0.320299	0.0428191	0.320097	0.0431466
																										0.311067	0.041838	0.311072	0.0420853	0.313494	0.0423203	0.320041	0.0421829	0.316407	0.0427476	0.321968	0.0422613	0.318733	0.0427653	0.317105	0.0433572	0.319447	0.0431904	0.323902	0.0430073	0.32461	0.0430172	0.324106	0.0432894
																										0.313859	0.0420268	0.31354	0.0422977	0.317833	0.042425	0.327331	0.0422997	0.319803	0.0429026	0.32832	0.0424112	0.323627	0.0428852	0.319494	0.0435896	0.322401	0.0433539	0.327781	0.0432645	0.328898	0.043254	0.328094	0.043466
																										0.316581	0.0422379	0.315946	0.0425289	0.322066	0.0425564	0.334443	0.0424535	0.323116	0.0430838	0.334517	0.0425998	0.328402	0.0430356	0.321823	0.0438389	0.325282	0.0435409	0.331564	0.0435528	0.333079	0.0435248	0.331984	0.0436731
																										0.319181	0.0424673	0.318243	0.0427743	0.32611	0.0427121	0.341238	0.0426414	0.326279	0.0432876	0.340438	0.0428233	0.332964	0.0432134	0.324046	0.0441001	0.328033	0.0437479	0.335176	0.0438665	0.337072	0.0438245	0.335699	0.0439064
																										0.321607	0.0427105	0.320387	0.0430291	0.329887	0.0428889	0.347585	0.0428596	0.329233	0.0435101	0.345967	0.0430773	0.337224	0.0434151	0.32612	0.0443683	0.330602	0.0439709	0.338547	0.0441996	0.3408	0.0441471	0.339168	0.0441616
																										0.323813	0.0429628	0.322335	0.0432883	0.333323	0.0430835	0.353359	0.0431041	0.33192	0.043747	0.350997	0.0433569	0.341099	0.0436369	0.328005	0.0446382	0.332937	0.0442054	0.341613	0.0445457	0.34419	0.0444864	0.342323	0.0444336
																										0.325756	0.0432193	0.324051	0.043547	0.336351	0.043292	0.358449	0.0433699	0.334287	0.0439936	0.35543	0.0436566	0.344515	0.0438745	0.329664	0.0449045	0.334995	0.0444469	0.344312	0.0448979	0.347176	0.0448358	0.345102	0.0447172
																										0.327398	0.043475	0.325499	0.0438001	0.338912	0.0435104	0.362755	0.0436519	0.336288	0.0442452	0.35918	0.0439707	0.347404	0.0441231	0.331065	0.045162	0.336734	0.0446907	0.346593	0.0452494	0.3497	0.0451885	0.347452	0.0450068
																										0.328706	0.0437249	0.326653	0.0440426	0.340957	0.0437345	0.366194	0.0439447	0.337884	0.0444968	0.362174	0.044293	0.349711	0.0443781	0.33218	0.0454058	0.33812	0.0449321	0.348411	0.0455933	0.351713	0.0455375	0.349327	0.0452968
																										0.329656	0.0439641	0.32749	0.0442699	0.342446	0.0439598	0.368698	0.0442425	0.339044	0.0447436	0.364354	0.0446173	0.35139	0.0446343	0.332989	0.0456312	0.339128	0.0451663	0.34973	0.045923	0.353175	0.0458762	0.35069	0.0455816
																										0.330228	0.044188	0.327993	0.0444775	0.343349	0.044182	0.370218	0.0445396	0.339746	0.0449808	0.365676	0.0449372	0.352408	0.0448869	0.333474	0.0458336	0.339736	0.0453889	0.350526	0.0462321	0.354058	0.046198	0.351515	0.0458555
																										0.330412	0.0443922	0.328153	0.0446614	0.34365	0.0443968	0.370726	0.0448301	0.339976	0.0452036	0.366116	0.0452464	0.352747	0.0451309	0.333627	0.0460092	0.339934	0.0455954	0.350783	0.0465145	0.354345	0.0464965	0.351785	0.0461134
[truncated: 18 more columns]

## Sheet: PlotDat57
Source sheet	BP13	0.648562	0.0800105	0.282809	0.04	0.217708	0.0315113	0	0.0485659	0.699779	0.0833393	0.742855	0.0897035	0.779026	0.0926131	0.783666	0.0942797	0.776533	0.0947577	0.785457	0.0950306	0.786348	0.0955609	0.788614	0.0964737	0.798779	0.0963291	0.799934	0.0968684	0.825676	0.0991809	0.813867	0.0995303	0.829191	0.0987628	0.838967	0.100288	0.884519	0.103163	0.930116	0.111662	1.02017	0.113556	2.87109	0.205688	2.82902	0.221849
Plot name	Concordia48	0.698347	0.086298	0.286667	0.0405002	0.343738	0.0476374	3.5	0.254966	0.697647	0.0840897	0.740995	0.0903145	0.776865	0.0933987	0.782233	0.0946211	0.775155	0.0950033	0.784162	0.0952535	0.784923	0.0959556	0.787161	0.0966818	0.797094	0.0968763	0.798896	0.0971191	0.823754	0.0997109	0.811959	0.100105	0.82722	0.0994738	0.837545	0.100789	0.882734	0.103672	0.928797	0.111994	1.01748	0.114467	2.86733	0.206579	2.82528	0.223054
Plot Type	1	0.726789	0.0900141	0.341871	0.047408	0.482812	0.0640155			0.691538	0.0845096	0.73568	0.0906	0.770648	0.09391	0.77814	0.0946685	0.771214	0.0949452	0.780457	0.0951925	0.780858	0.0960702	0.783	0.0965614	0.792281	0.0971283	0.795931	0.0971568	0.818265	0.0998662	0.806518	0.100316	0.821555	0.0999164	0.833466	0.101079	0.877632	0.103854	0.925029	0.112061	1.00971	0.11502	2.85634	0.207024	2.81435	0.223858
1st free col	49	0.749405	0.0909927	0.399443	0.0543616	0.636279	0.0806498			0.681948	0.084565	0.72734	0.0905371	0.760878	0.0941058	0.771719	0.0944181	0.765031	0.0945881	0.774643	0.0948525	0.774481	0.0958954	0.776468	0.0961222	0.784728	0.0970646	0.79128	0.0969783	0.809656	0.0996341	0.797984	0.100146	0.812656	0.100055	0.827062	0.101135	0.869626	0.103694	0.919119	0.111858	0.997503	0.11517	2.8386	0.207003	2.79672	0.224225
Sigma Level	1	0.743528	0.0912541	0.459484	0.0613614	0.805631	0.097544			0.669653	0.0842515	0.716652	0.0901307	0.748346	0.09397	0.76349	0.0938902	0.757106	0.0939608	0.76719	0.0942609	0.766309	0.0954452	0.768095	0.0953999	0.775048	0.0966905	0.78532	0.0965981	0.798623	0.0990336	0.787048	0.0996081	0.801244	0.0998775	0.818849	0.100952	0.859365	0.103206	0.911544	0.111401	0.981848	0.114904	2.81488	0.206517	2.77315	0.22414
Absolute Errs	FALSE	0.754417	0.0917481	0.522102	0.0684076	0.99251	0.114702			0.655649	0.0835944	0.70448	0.0894138	0.734067	0.0935138	0.754121	0.0931276	0.748081	0.0931143	0.758702	0.0934658	0.757005	0.0947563	0.758558	0.094453	0.764024	0.0960362	0.778534	0.0960471	0.78606	0.0981132	0.774596	0.098747	0.788242	0.0993991	0.809495	0.100545	0.84768	0.102428	0.902919	0.110728	0.964012	0.114244	2.78622	0.205588	2.74466	0.223606
Symbol Type	1	0.752328	0.0924975	0.587407	0.0755006	1.19873	0.132129			0.641071	0.0826469	0.691812	0.0884445	0.719199	0.092774	0.744369	0.092192	0.738686	0.0921171	0.749867	0.0925315	0.747322	0.0938843	0.74863	0.0933581	0.752551	0.0951547	0.771471	0.0953698	0.772985	0.0969474	0.761638	0.097632	0.774705	0.0986584	0.799756	0.0999465	0.835517	0.101425	0.893943	0.109892	0.945441	0.113244	2.75388	0.204257	2.71252	0.222646
Inverse Plot	FALSE	0.753735	0.092627	0.655513	0.0826407	1.42629	0.149828			0.6271	0.0814859	0.679673	0.0873012	0.704946	0.0918107	0.735025	0.0911593	0.729685	0.09105	0.741401	0.0915337	0.738044	0.0929001	0.739116	0.092204	0.741557	0.0941175	0.764703	0.0946212	0.760458	0.0956308	0.749222	0.0963535	0.761729	0.0977153	0.790422	0.099206	0.823862	0.100276	0.885342	0.108962	0.927637	0.111985	2.71926	0.20258	2.67812	0.221303
Color Plot	TRUE	0.758469	0.0932322	0.726541	0.0898282	1.67741	0.167804			0.614868	0.0802053	0.669047	0.0860767	0.692462	0.0907018	0.726846	0.090113	0.721804	0.0899994	0.733989	0.0905534	0.729924	0.0918831	0.730786	0.0910842	0.731933	0.0930085	0.758779	0.0938618	0.749492	0.09427	0.738355	0.0950149	0.750365	0.0966462	0.782249	0.098383	0.81366	0.0990763	0.877813	0.108013	0.912045	0.110568	2.68388	0.200633	2.64296	0.219635
3D plot	FALSE	0.775119	0.0944888	0.800617	0.0970635	1.95452	0.186061			0.605366	0.0789089	0.660795	0.0848702	0.68276	0.0895372	0.720495	0.0891381	0.715684	0.0890504	0.728232	0.0896698	0.723618	0.090916	0.724316	0.0900893	0.724459	0.0919177	0.75418	0.0931532	0.740977	0.0929753	0.729917	0.0937248	0.741535	0.0955378	0.775899	0.0975441	0.805736	0.0979216	0.871967	0.107122	0.899926	0.109109	2.64928	0.198499	2.60859	0.217715
Linear	FALSE	0.77974	0.0950852	0.877871	0.104347	2.2603	0.204603			0.599363	0.0777018	0.655585	0.0837793	0.676624	0.0884112	0.716485	0.0883133	0.711819	0.08828	0.724596	0.0889546	0.719638	0.090077	0.720229	0.0893001	0.71974	0.0909333	0.751276	0.0925528	0.735603	0.0918515	0.724592	0.0925877	0.735952	0.0944798	0.771886	0.0967573	0.800733	0.0969059	0.868277	0.106361	0.892263	0.107725	2.61698	0.196273	2.57649	0.215627
Data Range	BX3:CB21	0.768339	0.095613	0.95844	0.111678	2.59774	0.223435			0.597346	0.0766818	0.653839	0.0828924	0.674552	0.0874151	0.715143	0.0877057	0.710523	0.0877505	0.723377	0.0884657	0.718307	0.089434	0.718856	0.0887803	0.718159	0.0901353	0.750304	0.0921093	0.733804	0.0909896	0.722811	0.0916957	0.73407	0.0935579	0.770536	0.0960863	0.799056	0.0961115	0.867041	0.105792	0.889677	0.106529	2.5884	0.19405	2.54809	0.213463
Filled Symbols	FALSE	0.781631	0.0961603	1.04246	0.119059	2.97009	0.242562			0.599478	0.0759314	0.655699	0.0822814	0.676712	0.0866296	0.716576	0.0873643	0.711901	0.0875049	0.724672	0.0882427	0.719732	0.0890393	0.720309	0.0885723	0.719844	0.0895881	0.751343	0.0918586	0.735727	0.0904596	0.724718	0.091121	0.736042	0.0928469	0.771958	0.0955856	0.80084	0.0956027	0.86836	0.10546	0.892377	0.105618	2.56477	0.19193	2.52461	0.211316
ConcAge	FALSE	0.804752	0.0981872	1.13009	0.126488	IsoLine	IsoLine			0.605586	0.0755115	0.661015	0.0819959	0.68293	0.0861182	0.720669	0.0873169	0.715842	0.087563	0.728376	0.0883038	0.723797	0.0889247	0.72447	0.0886927	0.724657	0.0893361	0.754307	0.0918209	0.741216	0.0903043	0.730159	0.0909102	0.741706	0.0924043	0.776037	0.0952956	0.805942	0.0954207	0.872128	0.105394	0.900144	0.105065	2.54713	0.190003	2.50709	0.209281
ConcSwap	FALSE	0.841787	0.0996372	1.22148	0.133967					0.615177	0.0754561	0.669354	0.0820588	0.6927	0.0859225	0.72709	0.0875673	0.722025	0.0879201	0.734191	0.0886438	0.730174	0.0890996	0.731002	0.0891318	0.73221	0.0893997	0.758958	0.0919994	0.749825	0.0905363	0.738694	0.0910804	0.750605	0.092266	0.782442	0.0952399	0.813948	0.0955803	0.878038	0.105597	0.912349	0.104915	2.53625	0.188355	2.49629	0.207446
1st Symbol-row	1	0.898578	0.108727	1.3168	0.141495					0.627472	0.0757696	0.680043	0.0824652	0.705232	0.0860582	0.735319	0.0880952	0.72995	0.0885474	0.741644	0.0892354	0.738346	0.0895497	0.739375	0.0898541	0.741891	0.0897739	0.764918	0.0923795	0.760858	0.0911369	0.749629	0.0916179	0.762018	0.0924432	0.790654	0.0954229	0.82421	0.0960686	0.885613	0.106053	0.928004	0.105181	2.53262	0.187057	2.49268	0.205892
		0.954926	0.110042	1.4162	0.149073					0.641475	0.0764267	0.692215	0.0831821	0.719511	0.0865144	0.744689	0.0888578	0.738976	0.0893939	0.750131	0.0900305	0.74765	0.0902386	0.748912	0.0908011	0.752914	0.0904282	0.771705	0.0929306	0.773421	0.0920573	0.762081	0.0924789	0.775019	0.0929215	0.800009	0.0958299	0.835895	0.0968461	0.894238	0.106727	0.945839	0.105841	2.53638	0.186167	2.49642	0.204687
		2.70185	0.196373	1.51986	0.156702					0.656053	0.0773742	0.704883	0.0841514	0.734379	0.0872542	0.754441	0.0897934	0.74837	0.0903911	0.758966	0.0909648	0.757333	0.0911106	0.75884	0.0918959	0.764387	0.0913097	0.778768	0.0936079	0.786496	0.0932231	0.77504	0.0935939	0.788556	0.0936623	0.809747	0.0964279	0.848057	0.0978496	0.903214	0.107562	0.964411	0.106841	2.54737	0.185722	2.50735	0.203883
		2.66085	0.213871	1.62797	0.164381					0.670024	0.0785352	0.717022	0.0852947	0.748632	0.0882175	0.763784	0.0908261	0.757372	0.0914582	0.767433	0.0919625	0.766611	0.0920949	0.768354	0.09305	0.775381	0.0923469	0.785535	0.0943565	0.799023	0.0945397	0.787455	0.0948725	0.801532	0.0946054	0.819081	0.0971684	0.859712	0.0989979	0.911815	0.108492	0.982215	0.1081	2.56511	0.185743	2.52498	0.203516
		IsoLine	IsoLine	1.74072	0.172111					0.682256	0.0798158	0.727648	0.0865192	0.761116	0.0893264	0.771963	0.0918724	0.765252	0.0925088	0.774845	0.0929429	0.774732	0.0931118	0.776683	0.0941699	0.785005	0.0934559	0.791459	0.0951159	0.809989	0.0959005	0.798322	0.096211	0.812896	0.0956745	0.827255	0.0979915	0.869915	0.100198	0.919344	0.109441	0.997807	0.109517	2.58883	0.186229	2.54856	0.203601
				1.85831	0.179892					0.691759	0.0811121	0.7359	0.0877257	0.770818	0.090491	0.778315	0.0928473	0.771372	0.0934578	0.780601	0.0938265	0.781037	0.0940789	0.783154	0.0951647	0.792479	0.0945467	0.796059	0.0958245	0.818503	0.0971952	0.80676	0.0975011	0.821727	0.0967829	0.833605	0.0988304	0.877838	0.101353	0.92519	0.110332	1.00993	0.110976	2.61749	0.187158	2.57704	0.204136
				1.98095	0.187726					0.697762	0.0823192	0.74111	0.0888166	0.776954	0.091617	0.782324	0.093672	0.775237	0.0942282	0.784237	0.0945417	0.785017	0.0949179	0.787241	0.095954	0.797198	0.095531	0.798962	0.0964248	0.823878	0.098319	0.812086	0.0986383	0.827309	0.0978409	0.837617	0.0996172	0.882842	0.102368	0.92888	0.111093	1.01759	0.11236	2.64983	0.188489	2.60918	0.205095
				2.10884	0.195611					0.699779	0.0833393	0.742855	0.0897035	0.779026	0.0926131	0.783666	0.0942797	0.776533	0.0947577	0.785457	0.0950306	0.786348	0.0955609	0.788614	0.0964737	0.798779	0.0963291	0.799934	0.0968684	0.825676	0.0991809	0.813867	0.0995303	0.829191	0.0987628	0.838967	0.100288	0.884519	0.103163	0.930116	0.111662	1.02017	0.113556	2.68445	0.190166	2.64359	0.206438
				2.24222	0.203548																																							2.71983	0.192113	2.67874	0.208106
				2.38133	0.211538																																							2.75443	0.194247	2.71312	0.210026
				2.5264	0.219582																																							2.78672	0.196473	2.74521	0.212114
				2.6777	0.227678																																							2.81531	0.198695	2.77361	0.214279
				2.83549	0.235829																																							2.83894	0.200816	2.79709	0.216426
				3.00004	0.244033																																							2.85658	0.202743	2.81461	0.218461
				3.17166	0.252292																																							2.86745	0.204391	2.82541	0.220295
				3.3376	0.26																																							2.87109	0.205688	2.82902	0.221849
				IsoLine	IsoLine

## Sheet: PlotDat60
Source sheet	BP13	0.749405	0.0909927	0.703133	0.087376	0.737054	0.0907549	0.771651	0.0941442	0.806937	0.097544	0.842925	0.100954	0.68	0.0851475	0.68	0.0850176	0.68	0.0852773	0.668829	0.0840077	0.783666	0.0942797	0.776533	0.0947577	0.785457	0.0950306	0.786348	0.0955609	0.788614	0.0964737	0.798779	0.0963291	0.799934	0.0968684	0.825676	0.0991809	0.813867	0.0995303	0.829191	0.0987628	0.838967	0.100288	0.784405	0.0955196
Plot name	Concordia51	0.743528	0.0912541	0.703088	0.0874097	0.737007	0.0907898	0.771601	0.0941805	0.806884	0.0975817	0.842869	0.100994	0.68	0.0851475	0.68	0.0850176	0.68	0.0852773	0.702025	0.087376	0.783172	0.0945121	0.776059	0.0949363	0.785011	0.0951938	0.785857	0.0958222	0.788115	0.0966338	0.798361	0.0966313	0.799576	0.0970387	0.825199	0.0994848	0.813392	0.0998544	0.828706	0.0991408	0.838616	0.100557	0.784029	0.0956566
Plot Type	1	0.754417	0.0917481	0.702957	0.0874405	0.736868	0.090822	0.771454	0.0942139	0.806729	0.0976164	0.842707	0.101029	0.685907	0.0857475	0.685907	0.0856167	0.685907	0.0858783	0.735883	0.0907549	0.781757	0.0946485	0.774697	0.0950145	0.783731	0.0952629	0.784451	0.0959928	0.786678	0.0966847	0.797167	0.0968672	0.798551	0.0971395	0.823836	0.0997031	0.812041	0.100096	0.827305	0.0994607	0.837606	0.10078	0.782951	0.0957188
1st free col	47	0.752328	0.0924975	0.702751	0.0874662	0.73665	0.0908486	0.771224	0.0942416	0.806486	0.0976451	0.84245	0.101059	0.691834	0.0863479	0.691834	0.0862161	0.691834	0.0864797	0.770413	0.0941442	0.77946	0.0946851	0.772485	0.0949901	0.781652	0.0952362	0.782169	0.0960681	0.784342	0.0966249	0.795219	0.0970325	0.796887	0.097168	0.821615	0.0998315	0.809839	0.10025	0.825015	0.0997165	0.835957	0.100952	0.781218	0.0957034
Sigma Level	1	0.753735	0.092627	0.702486	0.0874846	0.736369	0.0908677	0.770927	0.0942615	0.806173	0.0976657	0.842121	0.101081	0.697783	0.0869486	0.697783	0.0868159	0.697783	0.0870814	0.805631	0.097544	0.776343	0.0946211	0.769484	0.0948638	0.77883	0.0951144	0.779073	0.0960461	0.781172	0.096456	0.792557	0.0971237	0.794629	0.0971234	0.81858	0.0998675	0.80683	0.100314	0.82188	0.099903	0.8337	0.101071	0.778905	0.0956111
Absolute Errs	FALSE	0.758469	0.0932322	0.702183	0.0874941	0.736049	0.0908777	0.770589	0.0942718	0.805817	0.0976765	0.841745	0.101092	0.703752	0.0875497	0.703752	0.087416	0.703752	0.0876834	0.841549	0.100954	0.772491	0.0944581	0.765774	0.0946391	0.775341	0.0949007	0.775247	0.0959272	0.777253	0.0961826	0.78923	0.0971393	0.791839	0.097007	0.814788	0.0998105	0.803071	0.100287	0.817962	0.100017	0.83088	0.101133	0.776114	0.095446
Symbol Type	1	0.775119	0.0944888	0.701868	0.0874941	0.735716	0.0908777	0.770237	0.0942718	0.805445	0.0976765	0.841353	0.101092	0.709742	0.0881511	0.709742	0.0880165	0.709742	0.0882857	IsoLine	IsoLine	0.768009	0.0942005	0.761458	0.094322	0.771282	0.0946011	0.770796	0.0957147	0.772693	0.0958123	0.785305	0.0970787	0.788593	0.0968218	0.810314	0.0996615	0.798636	0.100169	0.813337	0.100055	0.827551	0.101138	0.772966	0.0952153
Inverse Plot	FALSE	0.77974	0.0950852	0.701565	0.0874846	0.735396	0.0908677	0.769899	0.0942615	0.805088	0.0976657	0.840977	0.101081	0.715753	0.0887528	0.715753	0.0886172	0.715753	0.0888884			0.763019	0.0938554	0.756652	0.0939212	0.766763	0.0942236	0.765842	0.0954145	0.767615	0.0953551	0.780858	0.0969433	0.784979	0.0965731	0.805245	0.0994234	0.793612	0.0999615	0.808095	0.100018	0.823779	0.101086	0.7696	0.094929
Color Plot	TRUE	0.768339	0.095613	0.7013	0.0874662	0.735115	0.0908486	0.769603	0.0942416	0.804776	0.0976451	0.840648	0.101059	0.721786	0.0893549	0.721786	0.0892183	0.721786	0.0894914			0.757659	0.0934323	0.751489	0.0934477	0.761907	0.0937786	0.760518	0.0950347	0.762159	0.0948235	0.775975	0.0967357	0.781096	0.0962674	0.799679	0.0991008	0.788096	0.0996698	0.802337	0.0999058	0.819636	0.100977	0.766162	0.0945997
3D plot	FALSE	0.781631	0.0961603	0.701094	0.0874405	0.734897	0.090822	0.769372	0.0942139	0.804532	0.0976164	0.840391	0.101029	0.727839	0.0899573	0.727839	0.0898198	0.727839	0.0900948			0.752073	0.0929426	0.746108	0.0929143	0.756847	0.0932782	0.754972	0.0945857	0.756473	0.0942319	0.770751	0.0964599	0.777051	0.0959133	0.793726	0.0987001	0.782195	0.0992991	0.796177	0.0997206	0.815203	0.100814	0.762802	0.0942417
Linear	FALSE	0.804752	0.0981872	0.700963	0.0874097	0.734758	0.0907898	0.769226	0.0941805	0.804378	0.0975817	0.840228	0.100994	0.733914	0.09056	0.733914	0.0904215	0.733914	0.0906984			0.746414	0.0923997	0.740657	0.0923357	0.75172	0.0927361	0.749353	0.0940798	0.750713	0.0935966	0.765288	0.0961212	0.772952	0.0955203	0.7875	0.0982291	0.776024	0.0988567	0.789733	0.0994661	0.810567	0.1006	0.759668	0.0938708
Data Range	BX6:CB16	IsoLine	IsoLine	0.700918	0.087376	0.734711	0.0907549	0.769176	0.0941442	0.804325	0.097544	0.840173	0.100954	0.740011	0.091163	0.740011	0.0910236	0.740011	0.0913025			0.740837	0.0918185	0.735284	0.0917275	0.746667	0.092167	0.743815	0.0935307	0.745035	0.0929349	0.759693	0.0957263	0.768913	0.0950992	0.781123	0.0976969	0.769704	0.0983512	0.783132	0.0991473	0.805818	0.100339	0.756896	0.0935031
Filled Symbols	FALSE			0.700963	0.0873424	0.734758	0.0907199	0.769226	0.0941079	0.804378	0.0975064	0.840228	0.100915	0.746128	0.0917664	0.746128	0.091626	0.746128	0.0919068			0.735494	0.0912147	0.730136	0.0911065	0.741826	0.0915865	0.73851	0.0929534	0.739594	0.0922647	0.754073	0.0952829	0.765043	0.0946614	0.77472	0.0971138	0.763357	0.0977923	0.776502	0.0987704	0.801048	0.100036	0.754608	0.0931546
ConcAge	TRUE			0.701094	0.0873116	0.734897	0.0906878	0.769372	0.0940745	0.804532	0.0974717	0.840391	0.100879	0.752268	0.0923701	0.752268	0.0922288	0.752268	0.0925115			0.73053	0.0906049	0.725354	0.0904894	0.737327	0.0910104	0.733581	0.0923637	0.734539	0.0916044	0.748539	0.0947996	0.761448	0.0942189	0.768414	0.0964912	0.757107	0.097191	0.769971	0.0983426	0.79635	0.0996967	0.752903	0.0928407
ConcSwap	FALSE			0.7013	0.0872859	0.735115	0.0906611	0.769603	0.0940468	0.804776	0.0974429	0.840648	0.10085	0.758429	0.0929742	0.758429	0.0928319	0.758429	0.0931165			0.726081	0.0900056	0.721067	0.0898933	0.733295	0.0904545	0.729164	0.0917776	0.730007	0.0909721	0.743199	0.0942857	0.758225	0.0937838	0.762328	0.0958413	0.751076	0.096559	0.763667	0.0978724	0.791816	0.0993283	0.751856	0.092575
1st Symbol-row	1			0.701565	0.0872675	0.735396	0.090642	0.769899	0.0940269	0.805088	0.0974224	0.840977	0.100828	0.764611	0.0935786	0.764611	0.0934353	0.764611	0.0937219			0.722268	0.0894333	0.717393	0.0893342	0.72984	0.0899338	0.725379	0.0912111	0.726123	0.0903848	0.738155	0.0937514	0.755464	0.0933679	0.756582	0.0951767	0.745381	0.0959086	0.757713	0.0973688	0.787534	0.0989376	0.751513	0.0923691
				0.701868	0.087258	0.735716	0.0906321	0.770237	0.0940166	0.805445	0.0974116	0.841353	0.100817	0.770815	0.0941833	0.770815	0.0940391	0.770815	0.0943276			0.719196	0.0889035	0.714432	0.0888275	0.727054	0.0894626	0.722328	0.0906798	0.722992	0.0898587	0.733507	0.0932069	0.753239	0.0929826	0.751286	0.0945103	0.740132	0.0952525	0.752225	0.0968417	0.783586	0.0985324	0.751889	0.0922322
				0.702183	0.087258	0.736049	0.0906321	0.770589	0.0940166	0.805817	0.0974116	0.841745	0.100817	0.777041	0.0947884	0.777041	0.0946432	0.777041	0.0949336			0.716947	0.0884307	0.712264	0.088387	0.725015	0.0890537	0.720097	0.090198	0.7207	0.0894082	0.729345	0.092663	0.75161	0.0926383	0.746544	0.093855	0.735433	0.0946033	0.747308	0.0963014	0.780051	0.0981205	0.752967	0.09217
				0.702486	0.0872675	0.736369	0.090642	0.770927	0.0940269	0.806173	0.0974224	0.842121	0.100828	0.783289	0.0953938	0.783289	0.0952476	0.783289	0.0955399			0.715584	0.0880277	0.710949	0.0880247	0.723778	0.0887184	0.718744	0.0897789	0.719308	0.0890454	0.72575	0.0921301	0.750623	0.0923446	0.742448	0.0932238	0.731374	0.0939738	0.74306	0.0957583	0.776996	0.0977098	0.754701	0.0921854
				0.702751	0.0872859	0.73665	0.0906611	0.771224	0.0940468	0.806486	0.0974429	0.84245	0.10085	0.789559	0.0959995	0.789559	0.0958524	0.789559	0.0961466			0.715143	0.0877057	0.710523	0.0877505	0.723377	0.0884657	0.718307	0.089434	0.718856	0.0887803	0.722791	0.0916186	0.750304	0.0921093	0.739078	0.0926287	0.728035	0.0933763	0.739563	0.095223	0.774482	0.0973085	0.757014	0.0922776
				0.702957	0.0873116	0.736868	0.0906878	0.771454	0.0940745	0.806729	0.0974717	0.842707	0.100879	0.795851	0.0966056	0.795851	0.0964575	0.795851	0.0967537			0.715637	0.0874733	0.710997	0.0875719	0.723822	0.0883025	0.718798	0.0891727	0.719355	0.0886202	0.720527	0.0911386	0.750662	0.091939	0.736499	0.0920815	0.72548	0.0928222	0.736884	0.094706	0.772556	0.0969242	0.759805	0.0924428
				0.703088	0.0873424	0.737007	0.0907199	0.771601	0.0941079	0.806884	0.0975064	0.842869	0.100915	0.802165	0.097212	0.802165	0.0970629	0.802165	0.097361			0.717052	0.0873369	0.712359	0.0874937	0.725102	0.0882333	0.720204	0.0890021	0.720792	0.0885694	0.719002	0.0906993	0.751687	0.0918382	0.734762	0.0915927	0.723759	0.0923225	0.735077	0.0942173	0.771258	0.0965646	0.762952	0.0926735
				0.703133	0.087376	0.737054	0.0907549	0.771651	0.0941442	0.806937	0.097544	0.842925	0.100954	0.808501	0.0978187	0.808501	0.0976686	0.808501	0.0979687			0.719349	0.0873002	0.714571	0.0875181	0.727181	0.08826	0.722486	0.0889268	0.723128	0.0886292	0.718245	0.0903093	0.753351	0.0918097	0.733901	0.0911719	0.722906	0.0918868	0.734175	0.0937664	0.770611	0.0962365	0.766319	0.0929598
				ConcTikEll	ConcTikEll	ConcTikEll	ConcTikEll	ConcTikEll	ConcTikEll	ConcTikEll	ConcTikEll	ConcTikEll	ConcTikEll	0.81486	0.0984258	0.81486	0.0982747	0.81486	0.0985768			0.722467	0.0873643	0.717572	0.0876444	0.730004	0.0883819	0.725582	0.0889489	0.726298	0.0887981	0.71827	0.0899763	0.755609	0.0918543	0.733932	0.0908273	0.722937	0.0915236	0.734197	0.0933621	0.770629	0.0959464	0.769757	0.0932891
														0.821241	0.0990332	0.821241	0.0988812	0.821241	0.0991852			0.726319	0.0875273	0.721282	0.0878691	0.733492	0.0885955	0.729408	0.0890677	0.730217	0.0890714	0.719078	0.0897065	0.758399	0.0919707	0.734854	0.0905655	0.723852	0.0912401	0.735143	0.0930123	0.771311	0.0956999	0.773116	0.0936471
														0.827644	0.0996409	0.827644	0.0994879	0.827644	0.0997939			0.730801	0.0877849	0.725598	0.0881862	0.737551	0.0888952	0.733859	0.0892802	0.734777	0.0894417	0.720653	0.0895054	0.761646	0.0921558	0.73665	0.0903918	0.725633	0.0910416	0.736993	0.0927237	0.772644	0.0955018	0.776251	0.094018
														0.83407	0.100249	0.83407	0.100095	0.83407	0.100403			0.73579	0.0881299	0.730404	0.088587	0.74207	0.0892727	0.738814	0.0895804	0.739855	0.089899	0.722964	0.0893769	0.765259	0.0924046	0.739285	0.0903093	0.728245	0.0909322	0.739712	0.092502	0.774601	0.095356	0.779022	0.0943857
														0.840518	0.100857	0.840518	0.100702	0.840518	0.101012			0.741151	0.0885531	0.735567	0.0890605	0.746926	0.0897177	0.744137	0.0899602	0.745311	0.0904306	0.725966	0.0893234	0.769142	0.0927102	0.742707	0.0903199	0.731637	0.0909138	0.743247	0.0923516	0.777146	0.0952653	0.781311	0.0947342
														0.846989	0.101466	0.846989	0.10131	0.846989	0.101622			0.746736	0.0890428	0.740948	0.0895939	0.751986	0.0902181	0.749683	0.0904092	0.750997	0.0910221	0.7296	0.0893459	0.773188	0.0930644	0.74685	0.0904232	0.735744	0.0909869	0.747529	0.0922752	0.780228	0.0952314	0.783015	0.0950481
														0.853483	0.102075	0.853483	0.101918	0.853483	0.102232			0.752395	0.0895856	0.746399	0.0901725	0.757113	0.0907602	0.755302	0.0909151	0.756757	0.0916574	0.733796	0.0894441	0.777286	0.0934574	0.751633	0.0906172	0.740485	0.09115	0.752475	0.0922745	0.783787	0.0952551	0.784062	0.0953138
														0.86	0.102685	0.86	0.102527	0.86	0.102843			0.757972	0.0901669	0.751772	0.0907807	0.762166	0.0913293	0.76084	0.0914642	0.762435	0.0923192	0.738473	0.0896161	0.781326	0.0938785	0.756963	0.0908982	0.745769	0.0914	0.757988	0.0923494	0.787755	0.0953359	0.784405	0.0955196
														0.86	0.102685	0.86	0.102527	0.86	0.102843			0.763315	0.0907707	0.75692	0.0914017	0.767008	0.0919098	0.766145	0.0920415	0.767876	0.0929893	0.743539	0.0898584	0.785196	0.0943163	0.762737	0.0912607	0.751491	0.091732	0.763961	0.0924985	0.792053	0.0954722	Cyan	Cyan
														IsoLine	IsoLine	ConcBand	ConcBand	ConcBand	ConcBand			0.768279	0.0913805	0.761702	0.0920187	0.771506	0.0924858	0.771074	0.0926312	0.772931	0.0936496	0.748895	0.0901664	0.788791	0.0947588	0.768841	0.0916976	0.757542	0.0921396	0.770279	0.0927189	0.796598	0.0956613
																						0.772728	0.0919798	0.765989	0.0926149	0.775538	0.0930418	0.775491	0.0932173	0.777463	0.094282	0.754438	0.090534	0.792013	0.0951939	0.775158	0.0922005	0.763802	0.0926147	0.776817	0.0930063	0.801302	0.0958995
																						0.776541	0.0925521	0.769663	0.093174	0.778994	0.0935625	0.779276	0.0937838	0.781347	0.0948692	0.760059	0.0909542	0.794774	0.0956098	0.781564	0.0927595	0.770151	0.0931482	0.783449	0.093355	0.806073	0.0961823
																						0.779614	0.0930819	0.772624	0.0936807	0.781779	0.0940337	0.782327	0.0943151	0.784478	0.0953953	0.765649	0.0914187	0.797	0.0959951	0.787934	0.0933638	0.776465	0.0937297	0.790046	0.0937583	0.810819	0.0965042
																						0.781862	0.0935547	0.774792	0.0941212	0.783818	0.0944425	0.784559	0.0947969	0.78677	0.0958459	0.7711	0.0919185	0.798628	0.0963393	0.794145	0.0940016	0.782621	0.0943479	0.796478	0.0942084	0.815446	0.0968588
																						0.783226	0.0939576	0.776107	0.0944835	0.785055	0.0947779	0.785911	0.095216	0.788162	0.0962086	0.776305	0.0924439	0.799615	0.0966331	0.800075	0.0946605	0.788498	0.0949906	0.802622	0.0946965	0.819866	0.0972392
																						0.783666	0.0942797	0.776533	0.0947577	0.785457	0.0950306	0.786348	0.0955609	0.788614	0.0964737	0.781162	0.0929846	0.799934	0.0968684	0.80561	0.0953276	0.793983	0.0956455	0.808358	0.0952131	0.823991	0.0976381
																																0.785578	0.0935302			0.810641	0.09599	0.798969	0.0962997	0.813573	0.0957481	0.827741	0.0980477
																																0.789466	0.0940699			0.815071	0.0966349	0.803359	0.0969406	0.818166	0.0962912	0.831044	0.09846
																																0.792751	0.0945933			0.818813	0.0972495	0.807067	0.0975556	0.822048	0.0968317	0.833836	0.098867
																																0.795369	0.0950903			0.821795	0.0978221	0.810022	0.0981329	0.825144	0.0973591	0.836061	0.0992607
																																0.797268	0.0955511			0.823958	0.0983413	0.812165	0.098661	0.827392	0.0978632	0.837677	0.0996336
																																0.798412	0.0959667			0.82526	0.0987972	0.813455	0.0991299	0.82875	0.0983341	0.838652	0.0999783
																																0.798779	0.0963291			0.825676	0.0991809	0.813867	0.0995303	0.829191	0.0987628	0.838967	0.100288

## Sheet: Table A2 Sample BP13 
DR2020099 accompanies Youbi, N., Ernst, R.E., Soderlund, U., Boumehdi, M.A., Ait Lahna, A., Tassinari, C.C.G., El Moume, W., and Bensalah, M.K., 2020, The Central Iapetus magmatic province: An updated review and link with the ca. 580 Ma Gaskiers glaciation,
in Adatte, T., Bond, D.P.G., and Keller, G., eds., Mass Extinctions, Volcanism, and Impacts: New Developments: Geological Society of America Special Paper 544, p. 35–66, https://doi.org/10.1130/2020.2544(02).
Table DR2: SHRIMP zircon U-Th-Pb results of the andesitic juvenile fragment located at the uppermost top the Ouarzazte Group volcanic pile (sample BP13) in the Bou Azzer inlier.
Spot	204Pb /206Pb	±%	207Pb /206Pb	±%	208Pb /206Pb	±%	206Pb /238U	±%	7-corr 204Pb /206Pb	% 206Pbc	ppm U	ppm Th	7-corr ppm 206Pb*	7-corr ppm 208Pb*	232Th /238U	±%	(1) 206Pb /238U Age		(2) 206Pb /238U Age		(3) 206Pb /238U Age		(1) 207Pb /206Pb Age		(1) 208Pb /232Th Age		(2) 208Pb /232Th Age		(3) 207Pb /206Pb Age		% Dis- cor- dant	7corr 208Pb* /232Th	±%	Total 238U /206Pb	±%	Total 207Pb /206Pb	±%	(1) 238U /206Pb*	±%	(1) 207Pb* /206Pb*	±%	(1) 207Pb* /235U	±%	(1) 206Pb* /238U	±%	err corr	(3) 238U /206Pb*	±%	(3) 207Pb* /206Pb*
BP13-7.1	0.000761106	11.0319	0.0698493	0.598029	0.143376	1.14176	0.18481	1.47174	0.000875949	1.57019	689.137	310.047	47.2649	5.34994	0.464753	0.708113	496.186	11.1622	495.189	11.2913	503.018	12.1254	559.326	48.48	400.55	15.2937	385.565	11.3333	935.048	25.289	11.728	0.0192589	2.96752	12.3278	2.3323	0.0698493	0.598029	12.4984	2.33729	0.05879	2.22389	0.648562	3.22623	0.0800105	2.33729	0.724463	12.322	2.5058	0.0702287
BP13-8.1	5.89015e-05	70.7117	0.0595467	1.21833	0.0854241	2.79326	0.190628	1.71742	0.00010004	0.178706	168.835	46.2323	12.5065	1.03302	0.282868	0.412317	533.605	10.4738	533.229	10.6473	534.718	10.9439	555.644	35.1516	507.209	19.8471	497.885	21.1129	619.868	36.2536	4.13263	0.0249387	4.29296	11.5756	2.04384	0.0595467	1.21833	11.5878	2.0452	0.0586908	1.61148	0.698347	2.60379	0.086298	2.0452	0.78547	11.5626	2.13272	0.0604541
BP13-10.1	0.000165374	44.7232	0.0609628	1.27841	0.069865	3.29517	0.197082	2.00487	0.000156242	0.278523	147.028	31.563	11.3704	0.736709	0.221758	0.49569	555.621	9.88928	555.707	10.0556	556.878	10.2381	550.753	49.6442	517.058	29.6036	519.812	26.2182	620.841	35.8888	-0.922377	0.0260513	5.10892	11.0766	1.85296	0.0609628	1.27841	11.1094	1.85767	0.0585594	2.27399	0.726789	2.93632	0.0900141	1.85767	0.632652	11.0832	1.91903	0.0604814
BP13-2.1	5.36724e-05	40.8254	0.0605111	0.665151	0.0587557	1.84407	0.186468	1.57309	0.000115713	0.206177	584.961	117.743	45.6716	2.51412	0.207927	0.261121	561.405	8.91566	560.81	9.06937	563.392	9.19925	593.888	18.6296	496.203	14.1423	476.046	15.878	699.145	18.9362	5.71088	0.0238319	3.37483	10.9794	1.65779	0.0605111	0.665151	10.9899	1.65825	0.0597322	0.859575	0.749405	1.8678	0.0909927	1.65825	0.887811	10.9494	1.70522	0.0627316
BP13-11.1	3.63884e-05	40.8252	0.0596225	0.556566	0.067442	1.4407	0.20386	1.72624	5.08357e-05	0.0905623	761.932	169.871	59.7104	3.95447	0.230305	0.21166	562.95	9.08383	562.811	9.24841	564.313	9.4032	570.563	14.5833	522.697	12.2905	518.456	14.2176	644.567	17.2871	1.39337	0.0259824	2.77761	10.9513	1.68489	0.0596225	0.556566	10.9584	1.68509	0.059094	0.67024	0.743528	1.8135	0.0912541	1.68509	0.929197	10.9308	1.74031	0.0611515
BP13-6.1	4.00238e-05	35.3557	0.0602175	0.498727	0.0587452	1.38155	0.200974	1.20405	8.69484e-05	0.154859	953.41	176.673	75.0769	4.21205	0.191421	0.207633	565.868	8.48443	565.414	8.63432	566.383	8.73259	590.414	13.2395	547.45	12.3954	530.804	14.4736	618.353	15.2854	4.34252	0.0266094	2.76269	10.8916	1.56593	0.0602175	0.498727	10.8994	1.56614	0.0596366	0.61052	0.754417	1.68093	0.0917481	1.56614	0.93171	10.889	1.61054	0.0604117
BP13-15.1	7.51037e-05	35.356	0.0600806	0.687841	0.0446954	2.16769	0.185626	1.77774	6.83111e-05	0.121609	546.169	80.1361	43.4013	1.84844	0.151566	0.509961	570.291	8.61646	570.357	8.77746	571.602	8.81828	566.715	20.8921	510.7	18.2706	513.773	20.4755	637.312	19.0034	-0.6593	0.0257447	4.03618	10.7967	1.578	0.0600806	0.687841	10.8111	1.57871	0.0589897	0.959566	0.752328	1.84745	0.0924975	1.57871	0.854531	10.7852	1.61214	0.0609455
BP13-12.1	1.80022e-05	57.7353	0.0592788	0.550139	0.0480386	1.67705	0.195013	1.62339	1.16865e-05	0.0208032	822.331	131.697	65.4375	3.14569	0.165435	0.241564	571.055	9.78061	571.116	9.9649	572.063	10.0224	567.736	13.2595	529.172	13.5733	531.789	17.8031	622.227	15.9083	-0.610942	0.0266594	3.39201	10.7925	1.78961	0.0592788	0.550139	10.796	1.78971	0.0590173	0.609108	0.753735	1.89052	0.092627	1.78971	0.946675	10.7761	1.83085	0.0605203
BP13-1.1	4.49851e-05	70.7115	0.059656	1.06622	0.0546283	3.0394	0.19617	1.55438	3.08289e-05	0.0548601	230.437	41.0721	18.4596	0.997168	0.184117	0.444277	574.624	9.42024	574.763	9.60323	575.686	9.68797	567.19	29.031	535.111	22.0682	540.415	26.0145	624.181	28.825	-1.37005	0.0270977	4.87845	10.7173	1.71259	0.059656	1.06622	10.7259	1.71352	0.0590025	1.33349	0.758469	2.17126	0.0932322	1.71352	0.789185	10.7052	1.75912	0.0605751
BP13-3.2	1.80213e-05	57.7353	0.0597575	0.548683	0.0573424	1.54566	0.181749	2.53109	2.42825e-05	0.0431818	887.33	164.811	72.013	4.10496	0.191868	0.221248	582.03	6.44782	581.968	6.57277	582.745	6.63587	585.289	13.1735	556.493	11.323	554.215	14.2611	623.045	15.7926	0.582257	0.0277992	2.60865	10.5799	1.15843	0.0597575	0.548683	10.5833	1.15858	0.0594959	0.606949	0.775119	1.30793	0.0944888	1.15858	0.885808	10.5697	1.19097	0.0605432
BP13-4.1	0.000478555	9.76976	0.0664221	0.439528	0.0838507	1.9309	0.195191	1.779	0.000476631	0.847314	1217.02	288.742	99.4079	6.67679	0.245081	0.171508	585.542	11.5025	585.561	11.7153	588.098	12.0224	584.534	27.1968	514.48	19.7214	515.037	16.9912	714.579	22.3181	-0.180477	0.0258089	3.34124	10.4274	2.05328	0.0664221	0.439528	10.5169	2.05499	0.0594752	1.2529	0.77974	2.40681	0.0950852	2.05499	0.853823	10.4691	2.13895	0.0631885
BP13-3.1	0.000258147	18.1949	0.0620348	0.617814	0.0648412	1.65873	0.208146	1.48842	0.000166848	0.296497	584.863	110.209	48.114	2.85426	0.194655	0.261248	588.648	11.3057	589.565	11.5345	589.951	11.6772	540.38	29.5179	542.72	22.125	575.967	19.5164	609.782	20.044	-9.34687	0.0289059	3.43696	10.4109	2.0079	0.0620348	0.617814	10.4588	2.00965	0.058282	1.34971	0.768339	2.42083	0.095613	2.00965	0.83015	10.4347	2.0713	0.0601725
BP13-5.1	0.000266927	24.2552	0.0628301	0.872125	0.112858	1.80961	0.205091	2.32055	0.000216326	0.384322	281.433	91.7568	23.2678	2.47021	0.336794	0.599004	591.868	9.35794	592.378	9.53241	592.077	9.88247	565.353	40.3987	587.685	20.0157	598.378	17.3852	576.515	31.0891	-4.90869	0.0300473	2.94861	10.35	1.65074	0.0628301	0.872125	10.3993	1.65478	0.0589528	1.85507	0.781631	2.48588	0.0961603	1.65478	0.665673	10.3954	1.74694	0.059256
BP13-14.1	7.64232e-05	44.7222	0.0605531	0.880018	0.146192	1.55898	0.199387	2.32863	3.69677e-05	0.0656039	304.032	154.425	25.6609	3.75436	0.524687	0.243442	603.777	7.08897	604.181	7.23646	609.228	7.70036	583.384	26.6292	535.689	11.5808	541.147	12.0202	841.246	25.4934	-3.66189	0.0271349	2.25111	10.1708	1.22845	0.0605531	0.880018	10.1846	1.22995	0.0594437	1.22651	0.804752	1.73698	0.0981872	1.22995	0.708095	10.0892	1.32462	0.0671118
BP13-13.1	2.13553e-05	100.001	0.0615838	1.0224	0.183971	1.68754	0.1936	1.36012	9.39578e-05	0.166626	227.573	131.983	19.4525	3.55015	0.5991	0.271864	612.282	10.0989	611.53	10.2994	612.793	11.1165	648.883	24.5953	606.764	14.764	597.879	15.5008	673.69	38.068	5.91237	0.0300219	2.63117	10.0326	1.72854	0.0615838	1.0224	10.0364	1.72895	0.0612745	1.14529	0.841787	2.07388	0.0996372	1.72895	0.833681	10.0276	1.90165	0.0619879
BP13-9.1	-2.30953e-05	57.7354	0.0596049	0.615748	0.0524342	1.79739	0.155258	4.9264	-0.000150827	-0.266087	713.474	155.817	66.7862	3.90579	0.225599	1.01583	665.352	7.93945	666.776	8.14059	670.328	8.19693	601.408	14.9757	512.426	13.1111	557.716	17.1824	817.896	17.3525	-11.1914	0.0279772	3.12355	9.20108	1.25569	0.0596049	0.615748	9.19733	1.25591	0.05994	0.691853	0.898578	1.43387	0.108727	1.25591	0.875891	9.12547	1.2875	0.0663646
BP13-5.2	0.000136765	50.0017	0.0649139	1.25559	0.0840845	3.00229	0.140127	5.07724	0.000205152	0.361739	212.246	50.5323	20.0386	1.55175	0.24594	0.71366	672.994	12.1746	672.222	12.4335	671.903	12.6523	706.113	43.4066	703.537	33.6008	681.142	31.8684	658.013	37.71	4.9391	0.0342738	4.75795	9.06549	1.90125	0.0649139	1.25559	9.0874	1.90508	0.0629373	2.04039	0.954926	2.79151	0.110042	1.90508	0.682455	9.10294	1.98289	0.0615357
BP13-16.1	0.000210804	13.0611	0.102698	1.16496	0.0627079	1.83799	0.450723	0.411714	0.00179476	3.02271	659.962	1066.45	108.345	-0.318799	1.66926	10.1612	1155.81	23.5525	1127.42	24.2211	1426.47	28.9964	1620.14	23.4952	130.845	13.9815	-6.74485	9.98921	3303.48	129.261	31.2724	-0.000333646	-148.077	5.07427	2.2254	0.102698	1.16496	5.09235	2.22589	0.0997881	1.26246	2.70185	2.55898	0.196373	2.22589	0.869834	4.03757	2.26593	0.269563
BP13-16.2	0.000501223	18.7773	0.09723	0.70222	0.0588782	2.376	0.212094	5.21361	0.00110251	1.83471	380.789	199.903	69.2507	1.34314	0.542295	2.37295	1249.41	22.5134	1237.94	23.58	1316.55	24.0898	1430.48	31.579	324.412	29.7927	151.009	26.6057	2193.24	21.5634	13.918	0.00749917	17.6845	4.63672	1.97588	0.09723	0.70222	4.67572	1.98219	0.0902335	1.65463	2.66085	2.58203	0.213871	1.98219	0.767686	4.41344	2.02297	0.137286
Errors are 1-sigma; Pbc and Pb* indicate the common and radiogenic portions, respectively.
Error in Standard calibration was 0.32% (not included in above errors but required when comparing data from different mounts).
(1) Common Pb corrected using measured 204Pb.
(2) Common Pb corrected by assuming 206Pb/238U-207Pb/235U age-concordance
(3) Common Pb corrected by assuming 206Pb/238U-208Pb/232Th age-concordance
[truncated: 6 more columns]

## Sheet: PlotDat62
Source sheet	EJR12	0.759275	0.0934039	0.703133	0.087376	0.737054	0.0907549	0.771651	0.0941442	0.806937	0.097544	0.842925	0.100954	0.87963	0.104375	0.917067	0.107807	0.955248	0.111249	0.688397	0.086	0.689697	0.086	0.687107	0.086	0.668829	0.0840077	0.795327	0.0969059	0.857993	0.098649	0.852254	0.0980552	0.815517	0.0982544	0.841779	0.10038	0.842308	0.0985821	0.825465	0.10063	0.844099	0.0997498	0.833141	0.100005	0.842369	0.101717	0.855122	0.101299
Plot name	Concordia53	0.798973	0.0952974	0.703088	0.0874097	0.737007	0.0907898	0.771601	0.0941805	0.806884	0.0975817	0.842869	0.100994	0.879572	0.104416	0.917005	0.107849	0.955184	0.111293	0.688397	0.086	0.697165	0.0867537	0.688397	0.0861312	0.702025	0.087376	0.794807	0.0971539	0.857391	0.0991041	0.851747	0.0984307	0.815058	0.0985471	0.841196	0.100667	0.84174	0.0989457	0.82486	0.100919	0.843545	0.100079	0.832686	0.100339	0.841759	0.10198	0.854587	0.101576
Plot Type	1	0.801782	0.0960568	0.702957	0.0874405	0.736868	0.090822	0.771454	0.0942139	0.806729	0.0976164	0.842707	0.101029	0.8794	0.104453	0.916825	0.107887	0.954994	0.111332	0.697165	0.0868863	0.705978	0.0876394	0.697165	0.087019	0.735883	0.0907549	0.793317	0.0972996	0.855652	0.099485	0.850268	0.09876	0.813739	0.0987743	0.839524	0.100843	0.840087	0.0992471	0.823127	0.101089	0.841954	0.100321	0.831383	0.100603	0.840009	0.102119	0.853054	0.101756
1st free col	69	0.783472	0.0961456	0.702751	0.0874662	0.73665	0.0908486	0.771224	0.0942416	0.806486	0.0976451	0.84245	0.101059	0.87913	0.104484	0.916541	0.107919	0.954696	0.111365	0.705978	0.0877734	0.714837	0.0885258	0.705978	0.0879075	0.770413	0.0941442	0.790899	0.097339	0.85281	0.0997844	0.847845	0.0990366	0.811593	0.0989298	0.83681	0.100904	0.837396	0.0994781	0.820315	0.101136	0.839368	0.100468	0.829258	0.100792	0.837169	0.102131	0.850565	0.101834
Sigma Level	1	0.801299	0.096632	0.702486	0.0874846	0.736369	0.0908677	0.770927	0.0942615	0.806173	0.0976657	0.842121	0.101081	0.878783	0.104506	0.916176	0.107942	0.954312	0.111389	0.714837	0.0886612	0.723742	0.0894129	0.714837	0.0887967	0.805631	0.097544	0.787618	0.0972711	0.848919	0.0999965	0.844525	0.0992553	0.808681	0.0990094	0.833127	0.100849	0.833739	0.0996324	0.816499	0.101057	0.835859	0.100517	0.826352	0.100902	0.833314	0.102016	0.847188	0.101809
Absolute Errs	FALSE	0.801996	0.0966658	0.702183	0.0874941	0.736049	0.0908777	0.770589	0.0942718	0.805817	0.0976765	0.841745	0.101092	0.878388	0.104518	0.91576	0.107954	0.953875	0.111401	0.723742	0.0895497	0.732693	0.0903007	0.723742	0.0896866	0.841549	0.100954	0.783564	0.0970977	0.844057	0.100117	0.840374	0.0994117	0.805081	0.0990108	0.828576	0.100679	0.829216	0.0997058	0.811785	0.100856	0.831521	0.100466	0.822721	0.100931	0.82855	0.101776	0.843014	0.10168
Symbol Type	1	0.783538	0.0965529	0.701868	0.0874941	0.735716	0.0908777	0.770237	0.0942718	0.805445	0.0976765	0.841353	0.101092	0.877975	0.104518	0.915326	0.107954	0.953419	0.111401	0.732693	0.090439	0.741691	0.0911893	0.732693	0.0905773	0.878181	0.104375	0.778848	0.0968236	0.838317	0.100144	0.835471	0.0995028	0.800891	0.0989341	0.823281	0.100398	0.82395	0.0996962	0.806299	0.100537	0.826475	0.100317	0.818437	0.100879	0.823007	0.101419	0.838158	0.101452
Inverse Plot	FALSE	0.805507	0.0968628	0.701565	0.0874846	0.735396	0.0908677	0.769899	0.0942615	0.805088	0.0976657	0.840977	0.101081	0.87758	0.104506	0.91491	0.107942	0.952982	0.111389	0.741691	0.091329	0.750736	0.0920786	0.741691	0.0914686	0.915543	0.107807	0.773597	0.0964561	0.831812	0.100077	0.829912	0.0995268	0.796227	0.0987814	0.817386	0.100015	0.818086	0.099604	0.800193	0.100109	0.820856	0.100074	0.813582	0.100747	0.816837	0.100953	0.832751	0.10113
Color Plot	TRUE	0.789135	0.0967479	0.7013	0.0874662	0.735115	0.0908486	0.769603	0.0942416	0.804776	0.0976451	0.840648	0.101059	0.877233	0.104484	0.914545	0.107919	0.952599	0.111365	0.750736	0.0922197	0.759827	0.0929686	0.750736	0.0923608	0.953647	0.111249	0.767956	0.0960054	0.824667	0.099916	0.823807	0.0994833	0.791214	0.0985567	0.811053	0.0995391	0.811783	0.0994316	0.793633	0.0995848	0.814818	0.099743	0.808252	0.100537	0.810207	0.100392	0.826942	0.100724
3D plot	FALSE	0.799995	0.0974573	0.701094	0.0874405	0.734897	0.090822	0.769372	0.0942139	0.804532	0.0976164	0.840391	0.101029	0.876963	0.104453	0.914261	0.107887	0.9523	0.111332	0.759827	0.0931111	0.768966	0.0938593	0.759827	0.0932536	IsoLine	IsoLine	0.762079	0.0954838	0.817022	0.0996656	0.817272	0.0993731	0.78599	0.0982663	0.804453	0.0989841	0.805212	0.0991838	0.786797	0.0989775	0.808527	0.0993336	0.802549	0.100253	0.803299	0.0997509	0.82089	0.100244
Linear	FALSE	0.817995	0.098028	0.700963	0.0874097	0.734758	0.0907898	0.769226	0.0941805	0.804378	0.0975817	0.840228	0.100994	0.876791	0.104416	0.914081	0.107849	0.952111	0.111293	0.768966	0.0940032	0.778152	0.0947507	0.768966	0.0941472			0.756124	0.0949054	0.809026	0.0993301	0.810436	0.0991983	0.780698	0.097918	0.797767	0.098365	0.798554	0.0988673	0.779872	0.0983042	0.802153	0.0988568	0.796586	0.0999006	0.7963	0.0990474	0.814758	0.099704
Data Range	BZ3:CD21	0.825889	0.0982688	0.700918	0.087376	0.734711	0.0907549	0.769176	0.0941442	0.804325	0.097544	0.840173	0.100954	0.876733	0.104375	0.914019	0.107807	0.952046	0.111249	0.778152	0.0948961	0.787386	0.0956429	0.778152	0.0950415			0.750256	0.094286	0.800834	0.0989162	0.803431	0.0989624	0.775481	0.0975213	0.791178	0.0976987	0.79199	0.0984907	0.773048	0.097583	0.795871	0.0983256	0.790477	0.099487	0.789403	0.0983004	0.808714	0.0991181
Filled Symbols	FALSE	0.80734	0.098347	0.700963	0.0873424	0.734758	0.0907199	0.769226	0.0941079	0.804378	0.0975064	0.840228	0.100915	0.876791	0.104335	0.914081	0.107765	0.952111	0.111206	0.787386	0.0957897	0.796667	0.0965358	0.787386	0.0959365			0.744634	0.0936426	0.792606	0.0984318	0.796395	0.09867	0.770482	0.0970872	0.784865	0.0970032	0.785699	0.0980644	0.766509	0.0968338	0.789852	0.0977545	0.784342	0.0990202	0.782794	0.0975305	0.802924	0.0985024
ConcAge	TRUE	0.805	0.0983469	0.701094	0.0873116	0.734897	0.0906878	0.769372	0.0940745	0.804532	0.0974717	0.840391	0.100879	0.876963	0.104298	0.914261	0.107727	0.9523	0.111166	0.796667	0.0966841	0.805997	0.0974295	0.796667	0.0968323			0.739411	0.0929927	0.784502	0.0978865	0.789463	0.0983267	0.765838	0.0966274	0.779	0.0962976	0.779853	0.0975999	0.760435	0.0960769	0.784259	0.0971591	0.778301	0.098509	0.776654	0.0967585	0.797545	0.0978737
ConcSwap	FALSE	0.80742	0.098376	0.7013	0.0872859	0.735115	0.0906611	0.769603	0.0940468	0.804776	0.0974429	0.840648	0.10085	0.877233	0.104267	0.914545	0.107695	0.952599	0.111133	0.805997	0.0975791	0.815376	0.0983238	0.805997	0.0977288			0.73473	0.092354	0.776679	0.0972907	0.782771	0.0979392	0.761675	0.0961544	0.773743	0.0956011	0.77461	0.0971099	0.754991	0.095333	0.779246	0.0965556	0.77247	0.0979636	0.771151	0.0960057	0.792724	0.0972493
1st Symbol-row	1	0.807258	0.0984886	0.701565	0.0872675	0.735396	0.090642	0.769899	0.0940269	0.805088	0.0974224	0.840977	0.100828	0.87758	0.104245	0.91491	0.107672	0.952982	0.11111	0.815376	0.0984749	0.824803	0.0992189	0.815376	0.098626			0.730718	0.0917439	0.769291	0.0966561	0.776449	0.0975151	0.758106	0.0956812	0.769238	0.0949328	0.770114	0.0966079	0.750326	0.0946223	0.77495	0.0959604	0.766964	0.0973946	0.766435	0.0952924	0.788592	0.0966461
		0.822916	0.0998201	0.701868	0.087258	0.735716	0.0906321	0.770237	0.0940166	0.805445	0.0974116	0.841353	0.100817	0.877975	0.104233	0.915326	0.10766	0.953419	0.111097	0.824803	0.0993715	0.834279	0.100115	0.824803	0.099524			0.727485	0.0911791	0.76248	0.0959951	0.77062	0.0970625	0.755229	0.0952206	0.765608	0.0943108	0.766488	0.0961074	0.746567	0.0939644	0.771487	0.0953899	0.761889	0.096813	0.762634	0.0946381	0.785262	0.0960806
		0.824638	0.100569	0.702183	0.087258	0.736049	0.0906321	0.770589	0.0940166	0.805817	0.0974116	0.841745	0.100817	0.878388	0.104233	0.91576	0.10766	0.953875	0.111097	0.834279	0.100269	0.843804	0.101011	0.834279	0.100423			0.72512	0.090675	0.756379	0.0953205	0.765398	0.0965904	0.753122	0.0947853	0.762951	0.0937521	0.763831	0.0956221	0.743816	0.093377	0.768952	0.0948596	0.757345	0.09623	0.759853	0.0940608	0.782824	0.0955682
		0.860597	0.103174	0.702486	0.0872675	0.736369	0.090642	0.770927	0.0940269	0.806173	0.0974224	0.842121	0.100828	0.878783	0.104245	0.916176	0.107672	0.954312	0.11111	0.843804	0.101167	0.853379	0.101909	0.843804	0.101322			0.723686	0.0902453	0.751108	0.0946455	0.760884	0.096108	0.751844	0.0943871	0.76134	0.093272	0.762214	0.0951653	0.742148	0.0928763	0.767414	0.0943839	0.75342	0.0956572	0.758166	0.0935761	0.781347	0.095123
		IsoLine	IsoLine	0.702751	0.0872859	0.73665	0.0906611	0.771224	0.0940468	0.806486	0.0974429	0.84245	0.10085	0.87913	0.104267	0.916541	0.107695	0.954696	0.111133	0.853379	0.102065	0.863003	0.102807	0.853379	0.102222			0.723223	0.0899018	0.746768	0.0939832	0.757166	0.0956245	0.751428	0.0940369	0.760819	0.0928835	0.761683	0.0947494	0.74161	0.0924758	0.766915	0.0939758	0.750189	0.0951056	0.75762	0.0931973	0.780869	0.0947569
				0.702957	0.0873116	0.736868	0.0906878	0.771454	0.0940745	0.806729	0.0974717	0.842707	0.100879	0.8794	0.104298	0.916825	0.107727	0.954994	0.111166	0.863003	0.102965	0.872678	0.103705	0.863003	0.103123			0.723744	0.0896538	0.743444	0.0933464	0.754316	0.0951494	0.751886	0.0937441	0.761403	0.0925973	0.762251	0.0943858	0.742215	0.0921866	0.767469	0.0936465	0.747717	0.094586	0.758231	0.0929347	0.781403	0.0944801
				0.703088	0.0873424	0.737007	0.0907199	0.771601	0.0941079	0.806884	0.0975064	0.842869	0.100915	0.879572	0.104335	0.917005	0.107765	0.955184	0.111206	0.872678	0.103865	0.882402	0.104605	0.872678	0.104025			0.725233	0.0895081	0.741201	0.0927476	0.75239	0.094692	0.753206	0.0935169	0.763074	0.0924211	0.763904	0.0940844	0.743948	0.0920164	0.769061	0.0934049	0.746051	0.0941084	0.75998	0.0927955	0.782936	0.0943001
				0.703133	0.087376	0.737054	0.0907549	0.771651	0.0941442	0.806937	0.097544	0.842925	0.100954	0.87963	0.104375	0.917067	0.107807	0.955248	0.111249	0.882402	0.104766	0.892178	0.105505	0.882402	0.104927			0.727652	0.0894687	0.740083	0.0921984	0.751426	0.0942612	0.755351	0.0933614	0.765789	0.0923598	0.766595	0.0938534	0.74676	0.0919701	0.771646	0.0932576	0.745223	0.0936823	0.762821	0.0927834	0.785425	0.0942217
				ConcTikEll	ConcTikEll	ConcTikEll	ConcTikEll	ConcTikEll	ConcTikEll	ConcTikEll	ConcTikEll	ConcTikEll	ConcTikEll	ConcTikEll	ConcTikEll	ConcTikEll	ConcTikEll	ConcTikEll	ConcTikEll	0.892178	0.105668	0.902003	0.106406	0.892178	0.10583			0.730932	0.0895366	0.74011	0.0917096	0.751441	0.0938653	0.758264	0.0932819	0.769472	0.0924151	0.770253	0.0936991	0.750576	0.0920487	0.775156	0.0932087	0.74525	0.0933157	0.766676	0.0928988	0.788803	0.0942472
																				0.902003	0.10657	0.91188	0.107308	0.902003	0.106734			0.734986	0.08971	0.741284	0.0912906	0.752437	0.0935121	0.761864	0.0932804	0.774023	0.0925853	0.774776	0.0936257	0.755291	0.0922502	0.779493	0.0932595	0.746131	0.093016	0.77144	0.0931386	0.792977	0.0943758
																				0.91188	0.107473	0.921809	0.10821	0.91188	0.107639			0.739703	0.0899842	0.74358	0.0909495	0.754393	0.0932084	0.766053	0.0933571	0.779318	0.092866	0.780041	0.0936353	0.760776	0.092569	0.78454	0.0934085	0.74785	0.092789	0.776982	0.0934961	0.797833	0.0946041
																				0.921809	0.108377	0.931788	0.109113	0.921809	0.108544			0.744953	0.0903516	0.746955	0.0906932	0.757271	0.0929601	0.770718	0.0935099	0.785213	0.0932493	0.785905	0.0937275	0.766882	0.0929965	0.790158	0.0936518	0.750372	0.092639	0.783153	0.0939617	0.803239	0.0949257
																				0.931788	0.109282	0.94182	0.110017	0.931788	0.10945			0.750594	0.0908023	0.751342	0.0905264	0.761016	0.0927722	0.77573	0.0937346	0.791546	0.093725	0.792209	0.0938999	0.773443	0.0935211	0.796196	0.0939826	0.753648	0.0925689	0.789782	0.0945227	0.809048	0.095332
																				0.94182	0.110187	0.951904	0.110922	0.94182	0.110357			0.756472	0.091324	0.756656	0.0904525	0.765554	0.0926481	0.780954	0.094025	0.798146	0.0942799	0.798779	0.0941477	0.780278	0.0941283	0.802487	0.094392	0.757615	0.0925802	0.796691	0.0951637	0.815101	0.0958118
																				0.951904	0.111093	0.96204	0.111827	0.951904	0.111265			0.762426	0.0919024	0.762793	0.0904728	0.770797	0.0925904	0.786247	0.0943733	0.804831	0.094899	0.805437	0.0944642	0.787203	0.0948017	0.808861	0.0948688	0.762196	0.0926726	0.803689	0.0958673	0.821233	0.096352
																				0.96204	0.112	0.963984	0.112	0.96011	0.112			0.768295	0.0925217	0.769635	0.0905871	0.776644	0.0926002	0.791463	0.0947699	0.811421	0.0955654	0.812001	0.0948408	0.794028	0.0955228	0.815143	0.0954	0.767301	0.0928444	0.810587	0.0966142	0.827276	0.096938
																				0.96204	0.112	ConcBand	ConcBand	ConcBand	ConcBand			0.773917	0.0931651	0.777048	0.0907931	0.782979	0.0926772	0.796462	0.0952041	0.817734	0.0962608	0.818292	0.0952671	0.800566	0.0962721	0.821163	0.0959711	0.772831	0.0930921	0.817196	0.0973842	0.833066	0.0975537
																				IsoLine	IsoLine							0.77914	0.0938151	0.784888	0.0910867	0.789681	0.09282	0.801106	0.0956639	0.823599	0.0969664	0.824139	0.0957316	0.806641	0.097029	0.826755	0.0965666	0.778678	0.093411	0.823335	0.0981561	0.838446	0.0981824
																												0.783821	0.0944538	0.793002	0.0914623	0.796618	0.0930259	0.80527	0.0961369	0.828855	0.0976629	0.829381	0.0962216	0.812084	0.0977729	0.831768	0.0971701	0.784729	0.0937948	0.828838	0.098909	0.843267	0.0988068
																												0.787833	0.0950638	0.801232	0.0919126	0.803656	0.0932907	0.808839	0.0966101	0.83336	0.0983312	0.833877	0.0967236	0.81675	0.0984835	0.836065	0.0977652	0.790866	0.0942361	0.833554	0.0996223	0.847399	0.09941
																												0.791065	0.0956286	0.809418	0.0924287	0.810657	0.0936093	0.811716	0.0970706	0.836991	0.0989532	0.837503	0.0972241	0.820509	0.0991415	0.839528	0.0983357	0.796968	0.0947263	0.837355	0.100276	0.850729	0.0999755
																												0.793431	0.0961327	0.8174	0.0930007	0.817486	0.0939756	0.813822	0.097506	0.839648	0.0995119	0.84016	0.0977094	0.82326	0.0997289	0.842062	0.0988661	0.802919	0.0952559	0.840137	0.100854	0.853166	0.100488
																												0.794864	0.0965624	0.825025	0.0936173	0.824009	0.0943824	0.815101	0.0979042	0.841258	0.099992	0.841777	0.0981662	0.824927	0.10023	0.8436	0.0993418	0.808601	0.0958144	0.841823	0.101338	0.854644	0.100933
																												0.795327	0.0969059	0.832142	0.0942667	0.830099	0.0948218	0.815517	0.0982544	0.841779	0.10038	0.842308	0.0985821	0.825465	0.10063	0.844099	0.0997498	0.813904	0.0963912	0.842369	0.101717	0.855122	0.101299
																														0.838613	0.0949361	0.835638	0.0952853											0.818726	0.0969749
																														0.844313	0.0956126	0.840518	0.0957637											0.822971	0.0975542
																														0.84913	0.0962829	0.844644	0.0962479											0.826558	0.0981178
																														0.852971	0.0969341	0.847936	0.0967283											0.829416	0.0986547
																														0.855762	0.0975534	0.85033	0.0971957											0.83149	0.0991545
																														0.857446	0.0981287	0.851778	0.0976409											0.83274	0.0996075
																														0.857993	0.098649	0.852254	0.0980552											0.833141	0.100005
[truncated: 18 more columns]

## Sheet: PlotDat63
Source sheet	EJR12	0.801782	0.0960568	0.754267	0.0924482	0.789207	0.0958428	0.824842	0.0992479	0.861187	0.102664	0.72827	0.09	0.729658	0.09	0.726889	0.09	0.718871	0.0890642	0.852254	0.0980552	0.815517	0.0982544	0.841779	0.10038	0.842308	0.0985821	0.825465	0.10063	0.844099	0.0997498	0.833141	0.100005	0.842369	0.101717	0.855122	0.101299	0.868835	0.102044	0.851448	0.102475	0.842555	0.100978	0.846465	0.101553	0.853174	0.102484	0.813693	0.09823
Plot name	Concordia54	0.783472	0.0961456	0.754219	0.0924839	0.789155	0.0958798	0.824788	0.0992863	0.86113	0.102703	0.72827	0.09	0.733449	0.0903754	0.72827	0.0901376	0.753063	0.0924482	0.851747	0.0984307	0.815187	0.0985057	0.841359	0.100629	0.8419	0.098893	0.825029	0.100882	0.8437	0.100033	0.832686	0.100339	0.841929	0.101947	0.854737	0.101539	0.86839	0.102318	0.850989	0.102749	0.842168	0.101267	0.846059	0.101833	0.852697	0.102796	0.8134	0.0983598
Plot Type	1	0.801299	0.096632	0.754076	0.0925166	0.789005	0.0959138	0.824629	0.0993216	0.860963	0.10274	0.733449	0.0905138	0.738643	0.0908887	0.733449	0.0906522	0.787935	0.0958428	0.850268	0.09876	0.81424	0.0987111	0.840159	0.1008	0.840715	0.0991606	0.823785	0.10105	0.842558	0.100255	0.831383	0.100603	0.840673	0.102089	0.853636	0.101711	0.867117	0.102513	0.849681	0.102937	0.841057	0.101499	0.844902	0.102045	0.851335	0.103024	0.812559	0.0984387
1st free col	51	0.801996	0.0966658	0.753852	0.0925438	0.788768	0.0959421	0.824379	0.0993509	0.8607	0.10277	0.738643	0.0910279	0.743853	0.0914022	0.738643	0.0911671	0.823501	0.0992479	0.847845	0.0990366	0.812694	0.0988665	0.838202	0.10089	0.838777	0.0993795	0.821758	0.10113	0.840694	0.100411	0.829258	0.100792	0.838626	0.102142	0.851842	0.101811	0.865042	0.102626	0.847549	0.103035	0.839244	0.10167	0.843015	0.102185	0.849115	0.103164	0.811205	0.0984633
Sigma Level	1	0.783538	0.0965529	0.753563	0.0925633	0.788464	0.0959623	0.824058	0.0993718	0.860362	0.102792	0.743853	0.0915422	0.749079	0.091916	0.743853	0.0916823	0.859775	0.102664	0.844525	0.0992553	0.810579	0.098969	0.835528	0.100897	0.836123	0.0995457	0.818986	0.101121	0.838146	0.100498	0.826352	0.100902	0.835826	0.102103	0.849389	0.101837	0.862205	0.102654	0.844634	0.103043	0.836765	0.101776	0.840436	0.102252	0.846081	0.103213	0.809398	0.0984324
Absolute Errs	FALSE	0.805507	0.0968628	0.753234	0.0925734	0.788116	0.0959728	0.823692	0.0993828	0.859976	0.102803	0.749079	0.0920568	0.75432	0.0924299	0.749079	0.0921976	IsoLine	IsoLine	0.840374	0.0994117	0.807937	0.0990165	0.832187	0.100821	0.832804	0.0996558	0.815525	0.101023	0.834963	0.100514	0.822721	0.100931	0.832329	0.101973	0.846325	0.101789	0.858661	0.102596	0.840993	0.102958	0.833668	0.101815	0.837213	0.102243	0.842291	0.103169	0.807218	0.0983474
Symbol Type	1	0.789135	0.0967479	0.752892	0.0925734	0.787754	0.0959728	0.823311	0.0993828	0.859574	0.102803	0.75432	0.0925716	0.759577	0.0929442	0.75432	0.0927133			0.835471	0.0995028	0.804819	0.0990082	0.828245	0.100663	0.828886	0.0997077	0.811441	0.100838	0.831206	0.100459	0.818437	0.100879	0.828203	0.101756	0.84271	0.101668	0.85448	0.102454	0.836697	0.102785	0.830012	0.101787	0.833411	0.102159	0.837819	0.103035	0.804759	0.0982121
Inverse Plot	FALSE	0.799995	0.0974573	0.752563	0.0925633	0.787407	0.0959623	0.822944	0.0993718	0.859188	0.102792	0.759577	0.0930867	0.76485	0.0934586	0.759577	0.0932291			0.829912	0.0995268	0.801285	0.0989441	0.823778	0.100427	0.824445	0.0997004	0.806814	0.10057	0.826949	0.100334	0.813582	0.100747	0.823528	0.101455	0.838614	0.101476	0.849742	0.102231	0.83183	0.102524	0.82587	0.101691	0.829103	0.102001	0.832752	0.102812	0.802129	0.0980323
Color Plot	TRUE	0.817995	0.098028	0.752274	0.0925438	0.787103	0.0959421	0.822623	0.0993509	0.85885	0.10277	0.76485	0.0936019	0.770139	0.0939733	0.76485	0.0937453			0.823807	0.0994833	0.797404	0.0988255	0.818874	0.100117	0.819566	0.0996341	0.801735	0.100223	0.822274	0.100142	0.808252	0.100537	0.818394	0.101076	0.834116	0.101217	0.844539	0.101931	0.826486	0.102183	0.821321	0.101531	0.824373	0.101773	0.827189	0.102505	0.799442	0.0978159
3D plot	FALSE	0.825889	0.0982688	0.75205	0.0925166	0.786866	0.0959138	0.822374	0.0993216	0.858587	0.10274	0.770139	0.0941175	0.775443	0.0944883	0.770139	0.0942616			0.817272	0.0993731	0.793252	0.0986548	0.813628	0.0997396	0.814346	0.0995099	0.7963	0.0998054	0.817273	0.0998854	0.802549	0.100253	0.812903	0.100627	0.829304	0.100896	0.838974	0.101559	0.820769	0.101766	0.816455	0.101309	0.819313	0.101478	0.821238	0.10212	0.796817	0.0975724
Linear	FALSE	0.80734	0.098347	0.751907	0.0924839	0.786715	0.0958798	0.822215	0.0992863	0.85842	0.102703	0.775443	0.0946333	0.780764	0.0950035	0.775443	0.0947782			0.810436	0.0991983	0.78891	0.0984353	0.808142	0.0993013	0.808885	0.0993304	0.790618	0.0993242	0.812044	0.0995702	0.796586	0.0999006	0.80716	0.100116	0.824273	0.100519	0.833153	0.101124	0.814791	0.101284	0.811366	0.101029	0.814021	0.101123	0.815015	0.101664	0.794368	0.0973123
Data Range	BZ5:CD18	0.805	0.0983469	0.751859	0.0924482	0.786664	0.0958428	0.822161	0.0992479	0.858363	0.102664	0.780764	0.0951493	0.7861	0.0955189	0.780764	0.0952951			0.803431	0.0989624	0.784462	0.0981712	0.802522	0.0988111	0.80329	0.0990991	0.784797	0.098789	0.806687	0.0992023	0.790477	0.099487	0.801278	0.0995533	0.819119	0.100094	0.827192	0.100632	0.808668	0.100744	0.806153	0.100697	0.808601	0.100715	0.808641	0.101147	0.792202	0.0970472
Filled Symbols	FALSE	0.80742	0.098376	0.751907	0.0924126	0.786715	0.0958058	0.822215	0.0992096	0.85842	0.102624	0.7861	0.0956655	0.791452	0.0960346	0.7861	0.0958121			0.796395	0.09867	0.779995	0.0978677	0.796879	0.0982785	0.79767	0.0988204	0.778952	0.0982104	0.801307	0.0987888	0.784342	0.0990202	0.795371	0.0989498	0.813943	0.0996282	0.821205	0.100095	0.80252	0.100157	0.800917	0.100319	0.803158	0.100261	0.80224	0.100577	0.790414	0.0967885
ConcAge	TRUE	0.807258	0.0984886	0.75205	0.0923798	0.786866	0.0957718	0.822374	0.0991743	0.858587	0.102587	0.791452	0.096182	0.796821	0.0965505	0.791452	0.0963295			0.789463	0.0983267	0.775595	0.0975306	0.791322	0.0977138	0.792134	0.0984997	0.773197	0.0975994	0.796008	0.0983379	0.778301	0.098509	0.789553	0.0983173	0.808847	0.0991315	0.815309	0.0995225	0.796464	0.0995353	0.795761	0.0999028	0.797798	0.0997705	0.795937	0.0999672	0.789082	0.0965476
ConcSwap	FALSE	IsoLine	IsoLine	0.752274	0.0923526	0.787103	0.0957435	0.822623	0.099145	0.85885	0.102557	0.796821	0.0966988	0.802205	0.0970667	0.796821	0.096847			0.782771	0.0979392	0.771349	0.0971666	0.785959	0.0971281	0.78679	0.0981433	0.767642	0.0969681	0.790895	0.0978583	0.77247	0.0979636	0.783939	0.0976681	0.803928	0.0986133	0.809619	0.0989254	0.790621	0.0988904	0.790785	0.0994563	0.792626	0.0992528	0.789854	0.0993283	0.788263	0.0963349
1st Symbol-row	1			0.752563	0.0923332	0.787407	0.0957233	0.822944	0.099124	0.859188	0.102535	0.802205	0.0972158	0.807605	0.0975831	0.802205	0.0973649			0.776449	0.0975151	0.767339	0.0967827	0.780895	0.0965327	0.781742	0.0977582	0.762397	0.0963288	0.786066	0.0973593	0.766964	0.0973946	0.778638	0.0970148	0.799283	0.0980837	0.804246	0.0983154	0.785103	0.0982349	0.786086	0.0989881	0.787741	0.098718	0.78411	0.0986732	0.787995	0.0961599
				0.752892	0.092323	0.787754	0.0957128	0.823311	0.0991131	0.859574	0.102524	0.807605	0.097733	0.813022	0.0980998	0.807605	0.0978829			0.77062	0.0970625	0.763642	0.0963864	0.776228	0.0959393	0.777088	0.0973518	0.757564	0.0956938	0.781616	0.0968506	0.761889	0.096813	0.773752	0.09637	0.795002	0.097553	0.799294	0.0977046	0.780018	0.0975815	0.781754	0.0985075	0.783239	0.0981765	0.778816	0.0980144	0.788288	0.0960301
				0.753234	0.092323	0.788116	0.0957128	0.823692	0.0991131	0.859976	0.102524	0.813022	0.0982505	0.818455	0.0986167	0.813022	0.0984012			0.765398	0.0965904	0.760332	0.0959855	0.772049	0.0953593	0.772919	0.0969321	0.753236	0.0950755	0.77763	0.0963422	0.757345	0.09623	0.769377	0.0957465	0.791169	0.0970315	0.79486	0.0971047	0.775465	0.0969431	0.777876	0.0980238	0.779208	0.097639	0.774076	0.0973649	0.78913	0.0959512
				0.753563	0.0923332	0.788464	0.0957233	0.824058	0.099124	0.860362	0.102535	0.818455	0.0987682	0.823904	0.0991338	0.818455	0.0989198			0.760884	0.096108	0.757472	0.0955876	0.768439	0.0948041	0.769316	0.0965072	0.749498	0.0944859	0.774187	0.0958439	0.75342	0.0956572	0.765598	0.0951562	0.787858	0.0965295	0.79103	0.0965275	0.771532	0.096332	0.774525	0.0975464	0.775726	0.0971158	0.769982	0.0967373	0.790484	0.0959266
				0.753852	0.0923526	0.788768	0.0957435	0.824379	0.099145	0.8607	0.102557	0.823904	0.0992862	0.82937	0.0996512	0.823904	0.0994386			0.757166	0.0956245	0.755118	0.0952006	0.765469	0.0942845	0.766349	0.0960854	0.746422	0.0939366	0.771354	0.0953654	0.750189	0.0951056	0.762489	0.0946107	0.785134	0.0960566	0.787878	0.0959842	0.768296	0.0957601	0.771767	0.0970845	0.772861	0.0966171	0.766613	0.0961437	0.79229	0.0959575
				0.754076	0.0923798	0.789005	0.0957718	0.824629	0.0991743	0.860963	0.102587	0.82937	0.0998044	0.834852	0.100169	0.82937	0.0999576			0.754316	0.0951494	0.753316	0.0948321	0.763196	0.0938106	0.764076	0.0956748	0.744069	0.0934382	0.769185	0.0949161	0.747717	0.094586	0.760109	0.0941207	0.783049	0.0956221	0.785466	0.0954854	0.76582	0.0952385	0.769656	0.0966473	0.770668	0.0961527	0.764036	0.0955958	0.794471	0.0960425
				0.754219	0.0924126	0.789155	0.0958058	0.824788	0.0992096	0.86113	0.102624	0.834852	0.100323	0.84035	0.100687	0.834852	0.100477			0.75239	0.094692	0.752101	0.094489	0.761665	0.0933916	0.762541	0.0952836	0.742484	0.0930005	0.767724	0.0945046	0.746051	0.0941084	0.758506	0.0936955	0.781644	0.0952344	0.783841	0.0950407	0.764152	0.0947775	0.768233	0.0962431	0.769191	0.0957315	0.762299	0.0951042	0.79693	0.0961778
				0.754267	0.0924482	0.789207	0.0958428	0.824842	0.0992479	0.861187	0.102664	0.84035	0.100842	0.845865	0.101205	0.84035	0.100996			0.751426	0.0942612	0.751497	0.0941782	0.760905	0.0930356	0.761773	0.0949192	0.741698	0.0926319	0.766998	0.0941391	0.745223	0.0936823	0.75771	0.0933436	0.780947	0.0949011	0.783034	0.0946589	0.763325	0.0943859	0.767526	0.0958798	0.768458	0.0953618	0.761438	0.0946784	0.79956	0.0963576
				ConcTikEll	ConcTikEll	ConcTikEll	ConcTikEll	ConcTikEll	ConcTikEll	ConcTikEll	ConcTikEll	0.845865	0.101361	0.851397	0.101723	0.845865	0.101516			0.751441	0.0938653	0.751515	0.0939057	0.760931	0.0927497	0.761789	0.0945889	0.741726	0.0923396	0.767021	0.0938266	0.74525	0.0933157	0.757737	0.0930718	0.780971	0.0946287	0.783062	0.0943473	0.763354	0.0940715	0.767548	0.0955646	0.768483	0.0950508	0.761469	0.0943268	0.802246	0.096574
												0.851397	0.10188	0.856945	0.102242	0.851397	0.102036			0.752437	0.0935121	0.752155	0.0936769	0.761743	0.0925393	0.762587	0.094299	0.742569	0.0921293	0.767793	0.0935732	0.746131	0.093016	0.758587	0.0928853	0.781716	0.0944224	0.783923	0.0941121	0.76424	0.0938402	0.768299	0.0953035	0.769266	0.0948045	0.762391	0.0940563	0.804871	0.0968175
												0.856945	0.102399	0.862509	0.102761	0.856945	0.102557			0.754393	0.0932084	0.753404	0.093496	0.763326	0.0924086	0.764153	0.0940551	0.744208	0.0920051	0.7693	0.0933838	0.74785	0.092789	0.760243	0.0927878	0.783167	0.0942863	0.7856	0.0939577	0.765964	0.0936967	0.769764	0.0951017	0.770792	0.0946277	0.764186	0.093872	0.80732	0.0970776
												0.862509	0.102919	0.86809	0.10328	0.862509	0.103077			0.757271	0.0929601	0.755239	0.0933667	0.765647	0.0923601	0.766455	0.0938621	0.746613	0.0919695	0.771511	0.0932621	0.750372	0.092639	0.762672	0.0927812	0.785295	0.094223	0.788062	0.0938873	0.768494	0.0936437	0.771916	0.094963	0.773031	0.0945238	0.766819	0.0937775	0.809486	0.0973427
												0.86809	0.103439	0.873688	0.103799	0.86809	0.103598			0.761016	0.0927722	0.757623	0.0932916	0.768662	0.0923947	0.769448	0.0937236	0.749737	0.092023	0.774384	0.0932105	0.753648	0.0925689	0.765828	0.0928656	0.78806	0.0942338	0.791261	0.0939022	0.77178	0.0936822	0.774711	0.0948902	0.775939	0.094495	0.77024	0.0937747	0.811274	0.0976014
												0.873688	0.103959	0.879303	0.104319	0.873688	0.104119			0.765554	0.0926481	0.760511	0.0932719	0.772312	0.0925118	0.773075	0.0936424	0.753519	0.0921647	0.777863	0.09323	0.757615	0.0925802	0.769649	0.0930394	0.791408	0.0943185	0.795133	0.094002	0.775758	0.0938115	0.778096	0.0948847	0.77946	0.0945416	0.774381	0.0938637	0.812607	0.0978423
												0.879303	0.104479	0.884935	0.104838	0.879303	0.10464			0.770797	0.0925904	0.763845	0.0933082	0.776527	0.0927091	0.777265	0.09362	0.757885	0.0923918	0.78188	0.0933202	0.762196	0.0926726	0.774061	0.0932992	0.795273	0.0944753	0.799604	0.0941849	0.780351	0.0940291	0.782004	0.0949465	0.783525	0.094663	0.779162	0.0940427	0.813425	0.098055
												0.884935	0.105	0.88669	0.105	0.88319	0.105			0.776644	0.0926002	0.767561	0.0933998	0.781224	0.0929828	0.781937	0.0936569	0.76275	0.0927	0.786356	0.0934794	0.767301	0.0928444	0.778977	0.0936399	0.799581	0.0947013	0.804586	0.0944473	0.785469	0.0943308	0.78636	0.0950746	0.788055	0.0948565	0.78449	0.0943083	0.813693	0.09823
												0.884935	0.105	ConcBand	ConcBand	ConcBand	ConcBand			0.782979	0.0926772	0.771587	0.0935447	0.786311	0.0933275	0.786999	0.0937524	0.76802	0.0930831	0.791206	0.0937044	0.772831	0.0930921	0.784303	0.0940549	0.804247	0.094992	0.809983	0.094784	0.791012	0.0947106	0.791079	0.0952663	0.792962	0.0951186	0.790261	0.0946552	Cyan	Cyan
												IsoLine	IsoLine							0.789681	0.09282	0.775845	0.0937403	0.791691	0.0937365	0.792352	0.0939046	0.773592	0.0935337	0.796334	0.0939909	0.778678	0.093411	0.789934	0.0945361	0.80918	0.0953419	0.81569	0.0951886	0.796874	0.0951612	0.796069	0.095518	0.79815	0.0954441	0.796362	0.0950767
																				0.796618	0.0930259	0.78025	0.0939827	0.797257	0.0942018	0.797894	0.0941105	0.779358	0.0940431	0.80164	0.0943333	0.784729	0.0937948	0.79576	0.0950742	0.814286	0.095744	0.821595	0.0956532	0.802939	0.0956738	0.801232	0.0958248	0.803519	0.0958266	0.802676	0.0955646
																				0.803656	0.0932907	0.784719	0.0942673	0.802902	0.0947145	0.803515	0.0943662	0.785205	0.0946014	0.807021	0.0947249	0.790866	0.0942361	0.801669	0.0956587	0.819463	0.0961906	0.827584	0.0961686	0.80909	0.0962384	0.806469	0.0961806	0.808964	0.0962588	0.809079	0.0961094
																				0.810657	0.0936093	0.789163	0.0945883	0.808516	0.0952645	0.809107	0.0946666	0.791019	0.0951977	0.812374	0.0951581	0.796968	0.0947263	0.807546	0.0962782	0.824612	0.0966729	0.83354	0.096725	0.815207	0.0968441	0.811678	0.0965787	0.814379	0.0967322	0.815447	0.0967006
																				0.817486	0.0939756	0.793497	0.0949397	0.813989	0.0958411	0.81456	0.0950059	0.796688	0.0958203	0.817592	0.0956245	0.802919	0.0952559	0.813275	0.0969206	0.829632	0.0971816	0.839347	0.0973113	0.821171	0.0974791	0.816756	0.0970111	0.819658	0.0972376	0.821655	0.0973265
																				0.824009	0.0943824	0.797635	0.0953146	0.819215	0.0964331	0.819769	0.0953776	0.802101	0.0964572	0.822575	0.0961151	0.808601	0.0958144	0.818746	0.0975735	0.834425	0.0977068	0.844892	0.0979163	0.826865	0.0981309	0.821606	0.0974695	0.824699	0.0977651	0.827583	0.0979751
																				0.830099	0.0948218	0.801498	0.0957056	0.824093	0.097029	0.824631	0.0957743	0.807152	0.0970959	0.827226	0.0966201	0.813904	0.0963912	0.823853	0.0982241	0.838899	0.0982383	0.850067	0.0985282	0.83218	0.0987869	0.826132	0.0979451	0.829404	0.0983045	0.833116	0.0986336
																				0.835638	0.0952853	0.80501	0.0961052	0.828527	0.0976171	0.829054	0.0961884	0.811744	0.0977241	0.831455	0.0971299	0.818726	0.0969749	0.828494	0.0988598	0.842966	0.0987656	0.854771	0.099135	0.837011	0.0994344	0.830247	0.0984284	0.833681	0.0988453	0.838145	0.0992894
																				0.840518	0.0957637	0.808102	0.0965056	0.832431	0.0981861	0.832949	0.0966117	0.815787	0.0983295	0.835178	0.0976345	0.822971	0.0975542	0.832581	0.0994682	0.846546	0.0992786	0.858914	0.099725	0.841264	0.100061	0.833871	0.0989101	0.837447	0.099377	0.842573	0.0999295
																				0.844644	0.0962479	0.810716	0.096899	0.835729	0.0987248	0.836242	0.0970361	0.819202	0.0989003	0.838324	0.0981241	0.826558	0.0981178	0.836034	0.100037	0.849572	0.0997673	0.862413	0.100287	0.844857	0.100654	0.836933	0.0993809	0.840628	0.0998892	0.846313	0.100542
																				0.847936	0.0967283	0.812799	0.0972777	0.838357	0.0992228	0.838869	0.0974533	0.821923	0.0994254	0.840831	0.0985891	0.829416	0.0986547	0.838785	0.100556	0.851982	0.100222	0.865202	0.100809	0.84772	0.101202	0.839373	0.0998316	0.843163	0.100372	0.849294	0.101114
																				0.85033	0.0971957	0.814311	0.0976343	0.840263	0.0996703	0.840777	0.0978552	0.823897	0.0998946	0.84265	0.0990206	0.83149	0.0991545	0.840781	0.101015	0.853731	0.100634	0.867226	0.101282	0.849797	0.101694	0.841144	0.100253	0.845002	0.100816	0.851456	0.101635
																				0.851778	0.0976409	0.815223	0.0979621	0.841412	0.100059	0.841931	0.0982339	0.825086	0.100299	0.843747	0.09941	0.83274	0.0996075	0.841984	0.101405	0.854784	0.100996	0.868444	0.101696	0.851048	0.102122	0.842212	0.100638	0.84611	0.101212	0.852758	0.102095
																				0.852254	0.0980552	0.815517	0.0982544	0.841779	0.10038	0.842308	0.0985821	0.825465	0.10063	0.844099	0.0997498	0.833141	0.100005	0.842369	0.101717	0.855122	0.101299	0.868835	0.102044	0.851448	0.102475	0.842555	0.100978	0.846465	0.101553	0.853174	0.102484

## Sheet: PlotDat65
Source sheet	AZB2	0.267656	0.035114	0.206425	0.03	0.205774	0.0299124	0.215477	0.03	0.309203	0.0354343	0.309854	0.0390117	0.324591	0.0398051	0.324117	0.0403546	0.313074	0.0414831	0.324854	0.0420489	0.336981	0.0440048	0.348777	0.0438285	0.336918	0.0438185	0.341455	0.0447232	0.652176	0.0448901	0.339357	0.0456662	0.3368	0.0457298	0.33988	0.0461012	0.343703	0.0463934	0.343682	0.0459223	0.381411	0.0455446
Plot name	Concordia56	0.277087	0.0383366	0.206425	0.03	0.217708	0.0315113	0.359129	0.05	0.308634	0.0356408	0.309402	0.0392678	0.324082	0.0401148	0.323584	0.0405485	0.312619	0.0417111	0.324405	0.0423252	0.336396	0.0442961	0.348279	0.044068	0.336321	0.0440625	0.340794	0.0450815	0.649825	0.0452622	0.338868	0.0459457	0.33643	0.0459379	0.339523	0.0463027	0.343226	0.0466667	0.34325	0.0461549	0.380608	0.0457982
Plot Type	1	0.287887	0.0388344	0.211515	0.0306833	0.229759	0.0331127			0.306948	0.0358329	0.308068	0.0394984	0.322585	0.0403896	0.322004	0.0407295	0.311285	0.0419032	0.323085	0.0425716	0.334684	0.0445417	0.346805	0.0442875	0.334565	0.0442764	0.338868	0.0453743	0.642816	0.0456217	0.337458	0.0461618	0.335369	0.0460875	0.338499	0.0464492	0.341853	0.0468728	0.341992	0.0463453	0.378223	0.0460365
1st free col	45	0.285175	0.0400767	0.216626	0.031367	0.24193	0.0347165			0.30419	0.0360055	0.305889	0.0396974	0.320143	0.040622	0.319419	0.0408927	0.309132	0.0420512	0.320931	0.0427815	0.331919	0.044731	0.344395	0.044481	0.331728	0.0444507	0.335763	0.0455888	0.631288	0.0459615	0.335186	0.046305	0.333664	0.0461721	0.336851	0.0465341	0.339643	0.0470028	0.339963	0.0464852	0.374321	0.0462529
Sigma Level	1	0.292535	0.0408924	0.221759	0.0320512	0.254222	0.0363229			0.300436	0.0361537	0.302925	0.0398593	0.31682	0.0408056	0.3159	0.0410337	0.306254	0.0421485	0.318001	0.0429492	0.328223	0.0448555	0.341116	0.0446432	0.327932	0.044578	0.331613	0.0457155	0.615463	0.046275	0.332154	0.0463692	0.331388	0.0461878	0.334652	0.0465539	0.336693	0.0470509	0.337251	0.0465684	0.369008	0.0464415
Absolute Errs	FALSE	0.292486	0.0412323	0.226914	0.0327358	0.266635	0.0379317			0.295787	0.0362735	0.299255	0.0399796	0.312708	0.0409355	0.311543	0.0411485	0.302776	0.0421909	0.314375	0.04307	0.323757	0.04491	0.337056	0.0447697	0.323344	0.0446526	0.3266	0.045749	0.595651	0.0465561	0.328492	0.0463514	0.328642	0.0461342	0.331999	0.0465076	0.333132	0.047015	0.333975	0.0465914	0.362431	0.0465972
Symbol Type	1	0.310605	0.0432515	0.232091	0.0334209	0.279171	0.0395431			0.290371	0.0363618	0.294981	0.0400551	0.307919	0.041008	0.306467	0.0412341	0.29885	0.0421766	0.310152	0.0431407	0.318715	0.044892	0.332327	0.0448571	0.318164	0.0446713	0.320943	0.0456878	0.572237	0.0467993	0.324362	0.0462526	0.325546	0.0460134	0.329007	0.0463972	0.329116	0.0468968	0.330278	0.0465531	0.354767	0.0467158
Inverse Plot	FALSE	0.312505	0.0433339	0.237289	0.0341064	0.291832	0.0411569			0.284336	0.036416	0.290219	0.0400837	0.302583	0.0410212	0.30081	0.0412881	0.294649	0.0421061	0.305447	0.0431593	0.31332	0.0448022	0.327057	0.0449028	0.312619	0.0446332	0.31489	0.0455346	0.545675	0.047	0.319943	0.0460769	0.322233	0.0458308	0.325806	0.0462276	0.32482	0.0467013	0.326322	0.0464552	0.346226	0.046794
Color Plot	TRUE	0.309804	0.043373	0.242509	0.0347924	0.304617	0.0427732			0.277845	0.0364346	0.285098	0.0400647	0.296847	0.0409748	0.294726	0.0413091	0.290355	0.0419826	0.300389	0.0431254	0.307806	0.0446447	0.321389	0.0449058	0.30695	0.0445401	0.308704	0.0452961	0.516485	0.0471541	0.315429	0.0458321	0.318851	0.0455943	0.322537	0.0460063	0.320432	0.0464372	0.32228	0.046302	0.337041	0.0468296
3D plot	FALSE	0.311868	0.0435821	0.247751	0.0354789	0.317529	0.0443921			0.271077	0.0364173	0.279759	0.0399985	0.290866	0.04087	0.288382	0.0412965	0.286156	0.0418115	0.295115	0.0430398	0.302414	0.0444263	0.31548	0.0448659	0.301407	0.044396	0.302657	0.0449826	0.485233	0.0472587	0.311018	0.0455289	0.315546	0.0453143	0.319343	0.0457428	0.316144	0.0461159	0.318327	0.0461001	0.327462	0.0468218
Linear	FALSE	0.410578	0.0446107	0.253016	0.0361658	0.330569	0.0460135			0.264215	0.0363644	0.274348	0.039887	0.284804	0.0407097	0.28195	0.0412506	0.282237	0.0416001	0.289769	0.0429049	0.29738	0.0441566	0.309489	0.0447842	0.29623	0.0442071	0.297012	0.0446079	0.452528	0.0473118	0.306901	0.0451806	0.312462	0.0450031	0.316364	0.0454486	0.312143	0.0457515	0.314638	0.0458585	0.317752	0.0467707
Data Range	BX3:CB19	0.317765	0.0444954	0.258302	0.0368531	0.343738	0.0476374			0.257447	0.0362774	0.26901	0.0397332	0.278827	0.0404983	0.275607	0.0411727	0.278767	0.0413579	0.284497	0.0427244	0.292924	0.0438473	0.303581	0.044663	0.291647	0.0439818	0.292017	0.0441884	0.419007	0.0473124	0.303259	0.0448022	0.309735	0.0446742	0.313728	0.0451368	0.308603	0.04536	0.311374	0.0455876	0.308174	0.0466777
Filled Symbols	FALSE	0.32062	0.0445988	0.263611	0.037541	0.357037	0.0492638			0.250957	0.0361586	0.263894	0.0395413	0.273096	0.0402414	0.269524	0.0410649	0.275899	0.0410953	0.279443	0.0425032	0.289241	0.0435119	0.297916	0.0445055	0.287858	0.0437299	0.287889	0.0437424	0.385321	0.0472603	0.300251	0.0444105	0.307484	0.044342	0.311552	0.0448207	0.305681	0.0449583	0.308676	0.0452993	0.298989	0.0465453
ConcAge	FALSE	0.324245	0.0450423	0.268942	0.0382292	IsoLine	IsoLine			0.244923	0.0360114	0.259137	0.0393166	0.267769	0.0399462	0.263868	0.0409301	0.273758	0.0408238	0.274745	0.0422473	0.286492	0.0431652	0.292649	0.044316	0.285027	0.0434624	0.284809	0.0432894	0.352127	0.0471566	0.298008	0.0440225	0.305807	0.044021	0.309931	0.0445144	0.303502	0.0445642	0.306663	0.0450062	0.29045	0.0463772
ConcSwap	FALSE	0.322713	0.0451299	0.274296	0.038918					0.23951	0.0358397	0.254869	0.0390651	0.26299	0.0396206	0.258793	0.0407721	0.272438	0.0405554	0.270531	0.0419637	0.284796	0.0428223	0.287924	0.0440998	0.283279	0.043191	0.282912	0.0428492	0.320071	0.0470034	0.296629	0.0436551	0.304777	0.0437253	0.308936	0.0442312	0.302164	0.0441948	0.305423	0.0447211	0.282788	0.046178
1st Symbol-row	1	0.324346	0.0451894	0.279672	0.0396072					0.234863	0.0356482	0.251208	0.0387938	0.258891	0.0392736	0.254438	0.0405951	0.271996	0.0403016	0.266916	0.0416602	0.284228	0.0424981	0.283869	0.0438626	0.282691	0.0429275	0.28228	0.0424411	0.289776	0.0468037	0.296174	0.0433245	0.30444	0.0434677	0.308609	0.0439834	0.301723	0.0438663	0.305009	0.0444565	0.276212	0.045953
		0.322615	0.0452351	0.285071	0.0402968					0.231112	0.0354421	0.248252	0.0385099	0.255582	0.0389146	0.250922	0.0404039	0.272451	0.0400737	0.263998	0.041345	0.284814	0.0422068	0.280595	0.0436111	0.283288	0.0426835	0.282941	0.0420828	0.261833	0.0465612	0.296663	0.043045	0.30481	0.0432596	0.308966	0.0437818	0.3022	0.043593	0.305441	0.0442239	0.270902	0.0457085
		IsoLine	IsoLine	0.290493	0.0409869					0.228357	0.0352271	0.246083	0.0382214	0.253155	0.0385535	0.24834	0.0402038	0.273785	0.0398815	0.261858	0.0410268	0.286526	0.0419612	0.278192	0.0433519	0.285043	0.0424697	0.284867	0.04179	0.236785	0.0462808	0.298073	0.042829	0.305871	0.04311	0.309991	0.0436354	0.303573	0.0433869	0.3067	0.0440335	0.267002	0.045451
				0.295938	0.0416775					0.226674	0.035009	0.24476	0.037936	0.251675	0.0382	0.246762	0.0400003	0.275938	0.0397336	0.260552	0.0407141	0.289291	0.0417719	0.276724	0.0430923	0.287881	0.0422953	0.287972	0.0415755	0.215119	0.0459679	0.300344	0.0426857	0.307576	0.0430255	0.311638	0.0435504	0.305783	0.0432569	0.308729	0.0438936	0.26462	0.0451876
				0.301405	0.0423685					0.226109	0.0347937	0.244319	0.0376615	0.251183	0.0378638	0.246232	0.0397988	0.278816	0.0396363	0.260118	0.0404156	0.292987	0.0416474	0.276233	0.0428393	0.291677	0.042168	0.292122	0.0414488	0.197258	0.0456286	0.303377	0.0426216	0.309852	0.0430097	0.313837	0.0435307	0.308733	0.0432088	0.311441	0.0438104	0.263819	0.0449256
				0.306896	0.04306					0.226677	0.0345872	0.244771	0.0374054	0.251693	0.0375541	0.246765	0.039605	0.282294	0.0395938	0.260567	0.0401393	0.297453	0.0415929	0.276731	0.0425998	0.296265	0.0420934	0.297135	0.0414153	0.183549	0.0452694	0.307039	0.0426393	0.312598	0.0430634	0.31649	0.043577	0.312294	0.0432447	0.314717	0.0437874	0.264622	0.0446719
				0.31241	0.0437519					0.228363	0.0343951	0.246105	0.0371748	0.253189	0.0372793	0.248345	0.039424	0.28622	0.0396082	0.261886	0.0398929	0.302494	0.0416109	0.278205	0.0423802	0.301445	0.0420747	0.302792	0.0414765	0.174259	0.0448974	0.311169	0.0427382	0.315695	0.0431842	0.319483	0.0436874	0.31631	0.0433629	0.318414	0.0438257	0.267007	0.0444337
				0.317947	0.0444443					0.231121	0.0342225	0.248284	0.0369758	0.255632	0.0370469	0.25093	0.0392608	0.290421	0.0396786	0.26404	0.039683	0.30789	0.0417007	0.280615	0.0421868	0.30699	0.0421128	0.308846	0.0416297	0.169568	0.0445199	0.315588	0.0429138	0.319007	0.0433668	0.322683	0.0438569	0.320606	0.0435584	0.32237	0.0439236	0.270909	0.0442173
				0.323507	0.0451371					0.234875	0.0340743	0.251249	0.0368139	0.258955	0.0368633	0.254449	0.0391198	0.294715	0.0398021	0.26697	0.0395154	0.313404	0.0418582	0.283894	0.0420245	0.312658	0.0422059	0.315031	0.0418682	0.169569	0.0441441	0.320101	0.0431586	0.322389	0.0436032	0.325952	0.0440783	0.324994	0.0438225	0.326412	0.0440768	0.276222	0.0440287
				0.329091	0.0458305					0.239524	0.0339544	0.254918	0.0366936	0.263067	0.0367334	0.258806	0.039005	0.298914	0.0399733	0.270596	0.0393945	0.318796	0.0420766	0.287954	0.0418981	0.318202	0.0423501	0.321078	0.0421817	0.17426	0.0437774	0.324513	0.0434618	0.325694	0.0438832	0.329146	0.0443418	0.329282	0.0441438	0.330364	0.0442787	0.2828	0.0438729
				0.334699	0.0465242					0.24494	0.0338662	0.259192	0.0366181	0.267856	0.0366609	0.263882	0.0389194	0.302834	0.0401846	0.274819	0.0393239	0.32383	0.0423463	0.292683	0.0418107	0.323378	0.0425389	0.326723	0.0425564	0.183551	0.0434269	0.32863	0.0438102	0.328778	0.0441944	0.332126	0.0446359	0.333283	0.0445082	0.334053	0.0445203	0.290464	0.0437544
				0.34033	0.0472185					0.250976	0.033812	0.263954	0.0365895	0.273191	0.0366477	0.26954	0.0388654	0.306303	0.0404269	0.279524	0.0393052	0.328286	0.0426556	0.297953	0.041765	0.327962	0.0427642	0.331718	0.0429758	0.197261	0.0430995	0.332272	0.0441885	0.331505	0.0445233	0.334761	0.0449478	0.336823	0.0448998	0.337318	0.0447912	0.299005	0.0436762
				0.345985	0.0479132					0.257466	0.0337934	0.269075	0.0366085	0.278927	0.0366941	0.275623	0.0388444	0.309171	0.0406895	0.284583	0.0393392	0.331969	0.042991	0.303621	0.041762	0.331751	0.0430162	0.335846	0.0434218	0.215123	0.0428015	0.33528	0.0445802	0.333756	0.0448555	0.336937	0.0452638	0.339745	0.0453014	0.340016	0.0450795	0.30819	0.0436405
				0.351664	0.0486083					0.264235	0.0338107	0.274414	0.0366747	0.284908	0.0367988	0.281967	0.038857	0.311312	0.0409609	0.289857	0.0394248	0.334718	0.0433377	0.30953	0.0418019	0.334582	0.0432837	0.338926	0.0438748	0.236789	0.0425386	0.337522	0.0449682	0.335433	0.0451765	0.338558	0.0455701	0.341923	0.0456955	0.342029	0.0453726	0.317768	0.0436483
				0.357367	0.0493039					0.271096	0.0338636	0.279826	0.0367862	0.29097	0.0369592	0.288399	0.0389029	0.312633	0.0412294	0.295203	0.0395596	0.336414	0.0436806	0.315521	0.0418836	0.336329	0.0435551	0.340823	0.0443151	0.261838	0.0423162	0.338901	0.0453356	0.336463	0.0454723	0.339554	0.0458534	0.343262	0.0460649	0.343269	0.0456577	0.327479	0.0436995
				0.363093	0.05					0.277864	0.0339506	0.285163	0.03694	0.296948	0.0371706	0.294743	0.0389808	0.313074	0.0414831	0.300474	0.0397401	0.336981	0.0440048	0.321429	0.0420048	0.336918	0.0438185	0.341455	0.0447232	0.289782	0.0421383	0.339357	0.0456662	0.3368	0.0457298	0.33988	0.0461012	0.343703	0.0463934	0.343682	0.0459223	0.337057	0.0437925
				0.363093	0.05					0.284354	0.0340694	0.29028	0.0371319	0.302678	0.0374275	0.300825	0.0390886			0.305528	0.0399613			0.327094	0.0421623					0.320077	0.0420086											0.346241	0.0439248
				IsoLine	IsoLine					0.290388	0.0342166	0.295037	0.0373566	0.308006	0.0377227	0.306481	0.0392234			0.310226	0.0402172			0.332361	0.0423518					0.352133	0.0419296											0.35478	0.0440929
										0.295802	0.0343883	0.299304	0.0376081	0.312784	0.0380483	0.311556	0.0393814			0.31444	0.0405008			0.337086	0.042568					0.385327	0.0419027											0.362443	0.0442922
										0.300448	0.0345798	0.302965	0.0378794	0.316884	0.0383953	0.315911	0.0395584			0.318056	0.0408043			0.341141	0.0428052					0.419013	0.0419286											0.369019	0.0445171
										0.3042	0.0347859	0.305921	0.0381633	0.320192	0.0387542	0.319427	0.0397496			0.320973	0.0411195			0.344415	0.0430567					0.452534	0.0420066											0.374329	0.0447617
										0.306955	0.0350009	0.30809	0.0384518	0.322619	0.0391154	0.322009	0.0399497			0.323114	0.0414378			0.346818	0.0433159					0.485239	0.0421353											0.378228	0.0450192
										0.308638	0.035219	0.309413	0.0387372	0.324099	0.0394689	0.323587	0.0401532			0.324419	0.0417504			0.348285	0.0435755					0.516491	0.0423123											0.380611	0.0452825
										0.309203	0.0354343	0.309854	0.0390117	0.324591	0.0398051	0.324117	0.0403546			0.324854	0.0420489			0.348777	0.0438285					0.545681	0.0425339											0.381411	0.0455446
																														0.572241	0.042796
																														0.595655	0.0430934
																														0.615467	0.0434203
																														0.63129	0.0437704
																														0.642818	0.0441368
																														0.649826	0.0445125
																														0.652176	0.0448901

## Sheet: PlotDat66
Source sheet	AZB2	0.310605	0.0432515	0.292236	0.0411569	0.305042	0.0427732	0.317974	0.0443921	0.331034	0.0460135	0.344224	0.0476374	0.282745	0.04	0.283214	0.04	0.282279	0.04	0.279171	0.0395431	0.336981	0.0440048	0.348777	0.0438285	0.336918	0.0438185	0.341455	0.0447232	0.339357	0.0456662	0.3368	0.0457298	0.33988	0.0461012	0.343703	0.0463934	0.343682	0.0459223	0.381411	0.0455446	0.326234	0.0446672
Plot name	Concordia57	0.312505	0.0433339	0.29222	0.0411724	0.305024	0.0427894	0.317956	0.0444088	0.331015	0.0460308	0.344204	0.0476554	0.282745	0.04	0.284899	0.0402147	0.282745	0.0400597	0.291832	0.0411569	0.336719	0.0442035	0.348421	0.0440319	0.336651	0.043984	0.341322	0.0448884	0.339135	0.045859	0.336632	0.0458747	0.339718	0.0462413	0.343486	0.0465825	0.343488	0.0460816	0.380838	0.0457596	0.326119	0.0447488
Plot Type	1	0.309804	0.043373	0.292172	0.0411866	0.304974	0.0428042	0.317903	0.0444242	0.33096	0.0460468	0.344146	0.0476719	0.284899	0.0402748	0.287056	0.0404892	0.284899	0.040335	0.304617	0.0427732	0.335948	0.0443836	0.347366	0.0442218	0.335862	0.0441377	0.340938	0.0450425	0.338498	0.0460253	0.336152	0.0459947	0.339254	0.046358	0.342866	0.0467434	0.342921	0.0462235	0.379131	0.0459644	0.325783	0.0448187
1st free col	45	0.311868	0.0435821	0.292097	0.0411985	0.304895	0.0428165	0.31782	0.044437	0.330873	0.04606	0.344056	0.0476856	0.287056	0.0405498	0.289217	0.0407638	0.287056	0.0406103	0.317529	0.0443921	0.334684	0.0445417	0.345633	0.0443943	0.334565	0.0442764	0.340306	0.0451841	0.337458	0.0461618	0.335369	0.0460875	0.338499	0.0464492	0.341853	0.0468728	0.341992	0.0463453	0.376325	0.046155	0.325235	0.0448749
Sigma Level	1	0.317765	0.0444954	0.292	0.0412069	0.304793	0.0428253	0.317714	0.0444461	0.330762	0.0460695	0.343939	0.0476954	0.289217	0.0408247	0.291382	0.0410384	0.289217	0.0408857	0.330569	0.0460135	0.332951	0.0446747	0.343254	0.0445463	0.332787	0.0443975	0.339432	0.045312	0.336034	0.0462658	0.3343	0.0461514	0.337465	0.0465129	0.340467	0.0469683	0.34072	0.0464446	0.372473	0.0463277	0.324492	0.0449159
Absolute Errs	FALSE	0.32062	0.0445988	0.291889	0.0412113	0.304677	0.0428299	0.317592	0.0444509	0.330635	0.0460745	0.343807	0.0477006	0.291382	0.0410998	0.29355	0.0413131	0.291382	0.0411612	0.343738	0.0476374	0.330783	0.04478	0.340278	0.0446746	0.330562	0.0444987	0.338322	0.0454252	0.334254	0.0463354	0.332964	0.0461851	0.336175	0.0465481	0.338736	0.0470281	0.339129	0.0465194	0.36765	0.0464791	0.323572	0.0449406
Symbol Type	1	0.324245	0.0450423	0.291774	0.0412113	0.304557	0.0428299	0.317466	0.0444509	0.330503	0.0460745	0.343668	0.0477006	0.29355	0.0413749	0.295722	0.0415879	0.29355	0.0414368	IsoLine	IsoLine	0.328223	0.0448555	0.33676	0.0447768	0.327932	0.044578	0.336986	0.0455227	0.332154	0.0463692	0.331388	0.0461878	0.334652	0.0465539	0.336693	0.0470509	0.337251	0.0465684	0.361951	0.0466063	0.322502	0.0449483
Inverse Plot	FALSE	0.322713	0.0451299	0.291663	0.0412069	0.304441	0.0428253	0.317344	0.0444461	0.330376	0.0460695	0.343536	0.0476954	0.295722	0.0416501	0.297897	0.0418628	0.295722	0.0417124			0.325319	0.0448998	0.332771	0.0448509	0.324949	0.0446339	0.335436	0.0456036	0.329773	0.0463665	0.329603	0.0461597	0.332927	0.0465303	0.334378	0.0470363	0.335121	0.0465905	0.355487	0.0467069	0.321309	0.0449388
Color Plot	TRUE	0.324346	0.0451894	0.291566	0.0411985	0.304339	0.0428165	0.317238	0.044437	0.330264	0.04606	0.343419	0.0476856	0.297897	0.0419254	0.300077	0.0421377	0.297897	0.0419881			0.32213	0.0449121	0.328387	0.0448956	0.321672	0.0446652	0.333685	0.0456672	0.327159	0.0463273	0.327643	0.0461011	0.331033	0.0464777	0.331836	0.0469846	0.332782	0.0465854	0.348382	0.0467787	0.320027	0.0449124
3D plot	FALSE	0.322615	0.0452351	0.291491	0.0411866	0.30426	0.0428042	0.317155	0.0444242	0.330178	0.0460468	0.343329	0.0476719	0.300077	0.0422008	0.302259	0.0424127	0.300077	0.0422639			0.318715	0.044892	0.323694	0.0449098	0.318164	0.0446713	0.331748	0.0457131	0.324362	0.0462526	0.325546	0.0460134	0.329007	0.0463972	0.329116	0.0468968	0.330278	0.0465531	0.340776	0.0468206	0.318691	0.0448698
Linear	FALSE	IsoLine	IsoLine	0.291443	0.0411724	0.30421	0.0427894	0.317102	0.0444088	0.330123	0.0460308	0.343271	0.0476554	0.302259	0.0424762	0.304446	0.0426878	0.302259	0.0425397			0.315144	0.0448399	0.318783	0.0448933	0.314493	0.0446522	0.329641	0.0457408	0.321436	0.0461436	0.323353	0.0458981	0.326888	0.0462903	0.326272	0.0467746	0.327659	0.0464942	0.332817	0.0468315	0.317338	0.0448121
Data Range	BX9:CB19			0.291427	0.0411569	0.304192	0.0427732	0.317084	0.0443921	0.330104	0.0460135	0.343252	0.0476374	0.304446	0.0427517	0.306636	0.0429629	0.304446	0.0428156			0.311483	0.044757	0.31375	0.0448465	0.310731	0.0446082	0.327383	0.04575	0.318439	0.0460025	0.321106	0.0457575	0.324717	0.0461592	0.323358	0.0466204	0.324975	0.04641	0.324659	0.0468114	0.316003	0.0447409
Filled Symbols	FALSE			0.291443	0.0411414	0.30421	0.0427571	0.317102	0.0443754	0.330123	0.0459961	0.343271	0.0476194	0.306636	0.0430273	0.30883	0.0432381	0.306636	0.0430916			0.307806	0.0446447	0.308693	0.0447703	0.30695	0.0445401	0.324992	0.0457408	0.315429	0.0458321	0.318851	0.0455943	0.322537	0.0460063	0.320432	0.0464372	0.32228	0.046302	0.316461	0.0467607	0.314723	0.0446583
ConcAge	TRUE			0.291491	0.0411272	0.30426	0.0427423	0.317155	0.04436	0.330178	0.0459802	0.343329	0.0476028	0.30883	0.0433029	0.311027	0.0435134	0.30883	0.0433677			0.304183	0.0445054	0.30371	0.0446661	0.303226	0.0444493	0.32249	0.0457132	0.312465	0.0456357	0.31663	0.0454118	0.320391	0.0458346	0.317551	0.0462285	0.319624	0.0461723	0.308383	0.0466802	0.313535	0.0445663
ConcSwap	FALSE			0.291566	0.0411153	0.304339	0.04273	0.317238	0.0443472	0.330264	0.0459669	0.343419	0.0475891	0.311027	0.0435786	0.313228	0.0437888	0.311027	0.0436438			0.300685	0.0443416	0.298898	0.0445359	0.299629	0.0443376	0.319896	0.0456673	0.309603	0.0454171	0.314486	0.0452134	0.31832	0.0456475	0.314769	0.0459985	0.31706	0.0460235	0.300582	0.0465716	0.312468	0.0444676
1st Symbol-row	1			0.291663	0.0411069	0.304441	0.0427212	0.317344	0.0443381	0.330376	0.0459574	0.343536	0.0475793	0.313228	0.0438544	0.315433	0.0440642	0.313228	0.04392			0.29738	0.0441566	0.294351	0.0443824	0.29623	0.0442071	0.317234	0.0456037	0.306901	0.0451806	0.312462	0.0450031	0.316364	0.0454486	0.312143	0.0457515	0.314638	0.0458585	0.29321	0.046437	0.311554	0.0443647
				0.291774	0.0411025	0.304557	0.0427166	0.317466	0.0443333	0.330503	0.0459525	0.343668	0.0475742	0.315433	0.0441303	0.317642	0.0443398	0.315433	0.0441963			0.294333	0.043954	0.290158	0.0442085	0.293096	0.0440604	0.314527	0.0455229	0.30441	0.0449307	0.310597	0.0447849	0.314561	0.0452419	0.309722	0.0454924	0.312405	0.0456804	0.28641	0.046279	0.310817	0.0442607
				0.291889	0.0411025	0.304677	0.0427166	0.317592	0.0443333	0.330635	0.0459525	0.343807	0.0475742	0.317642	0.0444062	0.319854	0.0446153	0.317642	0.0444727			0.291602	0.0437377	0.286399	0.0440175	0.290287	0.0439003	0.311796	0.0454254	0.302179	0.0446723	0.308927	0.0445631	0.312947	0.0450312	0.307554	0.0452263	0.310405	0.0454928	0.280315	0.0461006	0.310276	0.0441581
				0.292	0.0411069	0.304793	0.0427212	0.317714	0.0443381	0.330762	0.0459574	0.343939	0.0475793	0.319854	0.0446822	0.32207	0.044891	0.319854	0.0447491			0.289241	0.0435119	0.283148	0.0438132	0.287858	0.0437299	0.309067	0.0453123	0.300251	0.0444105	0.307484	0.044342	0.311552	0.0448207	0.305681	0.0449583	0.308676	0.0452993	0.275043	0.0459055	0.309948	0.04406
				0.292097	0.0411153	0.304895	0.04273	0.31782	0.0443472	0.330873	0.0459669	0.344056	0.0475891	0.32207	0.0449583	0.32429	0.0451667	0.32207	0.0450256			0.287296	0.0432811	0.280469	0.0435996	0.285855	0.0435526	0.306361	0.0451844	0.298664	0.0441504	0.306297	0.0441259	0.310405	0.0446146	0.304139	0.0446937	0.307252	0.0451036	0.270697	0.0456972	0.309839	0.0439688
				0.292172	0.0411272	0.304974	0.0427423	0.317903	0.04436	0.33096	0.0459802	0.344146	0.0476028	0.32429	0.0452345	0.326513	0.0454425	0.32429	0.0453022			0.285805	0.0430497	0.278414	0.0433809	0.284319	0.0433718	0.303702	0.0450428	0.297449	0.0438969	0.305389	0.043919	0.309527	0.0444168	0.302959	0.0444375	0.30616	0.0449096	0.267362	0.04548	0.309955	0.0438872
				0.29222	0.0411414	0.305024	0.0427571	0.317956	0.0443754	0.331015	0.0459961	0.344204	0.0476194	0.326513	0.0455107	0.328741	0.0457184	0.326513	0.0455788			0.284796	0.0428223	0.277022	0.0431612	0.283279	0.043191	0.301113	0.0448888	0.296629	0.0436551	0.304777	0.0437253	0.308936	0.0442312	0.302164	0.0441948	0.305423	0.0447211	0.265102	0.045258	0.310291	0.0438174
				0.292236	0.0411569	0.305042	0.0427732	0.317974	0.0443921	0.331034	0.0460135	0.344224	0.0476374	0.328741	0.045787	0.330972	0.0459944	0.328741	0.0458555			0.28429	0.0426031	0.27632	0.0429449	0.282756	0.0430137	0.298616	0.0447236	0.296221	0.0434297	0.304474	0.0435486	0.308642	0.0440613	0.301768	0.0439704	0.305053	0.0445417	0.263962	0.0450356	0.310838	0.0437612
				ConcTikEll	ConcTikEll	ConcTikEll	ConcTikEll	ConcTikEll	ConcTikEll	ConcTikEll	ConcTikEll	ConcTikEll	ConcTikEll	0.330972	0.0460633	0.333206	0.0462704	0.330972	0.0461323			0.284296	0.0423966	0.276323	0.0427361	0.282759	0.0428435	0.296231	0.0445486	0.296232	0.043225	0.304485	0.0433924	0.308652	0.0439106	0.30178	0.0437684	0.30506	0.0443749	0.263963	0.044817	0.311582	0.0437202
														0.333206	0.0463398	0.335445	0.0465465	0.333206	0.0464092			0.284814	0.0422068	0.27703	0.042539	0.283288	0.0426835	0.29398	0.0443655	0.296663	0.043045	0.30481	0.0432596	0.308966	0.0437818	0.3022	0.043593	0.305441	0.0442239	0.265106	0.0446066	0.312501	0.0436955
														0.335445	0.0466163	0.337687	0.0468226	0.335445	0.0466862			0.285834	0.0420373	0.278428	0.0423574	0.284333	0.042537	0.291882	0.0441756	0.297503	0.0428933	0.305442	0.0431529	0.309577	0.0436776	0.303019	0.0434475	0.306191	0.0440917	0.267368	0.0444085	0.313572	0.0436878
														0.337687	0.0468929	0.339933	0.0470989	0.337687	0.0469632			0.287336	0.0418914	0.280488	0.0421947	0.285874	0.0424067	0.289954	0.0439807	0.298739	0.0427727	0.306371	0.0430744	0.310474	0.0436	0.304221	0.0433348	0.307294	0.0439809	0.270705	0.0442264	0.314764	0.0436973
														0.339933	0.0471696	0.342183	0.0473752	0.339933	0.0472403			0.289291	0.0417719	0.283172	0.0420543	0.287881	0.0422953	0.288213	0.0437824	0.300344	0.0426857	0.307576	0.0430255	0.311638	0.0435504	0.305783	0.0432569	0.308729	0.0438936	0.275053	0.0440639	0.316046	0.0437237
														0.342183	0.0474463	0.344436	0.0476516	0.342183	0.0475174			0.291661	0.0416813	0.286427	0.0419387	0.290315	0.0422048	0.286674	0.0435823	0.302289	0.0426339	0.309035	0.0430072	0.313048	0.0435299	0.307675	0.0432156	0.310468	0.0438316	0.280326	0.0439242	0.317382	0.0437663
														0.344436	0.0477231	0.346693	0.047928	0.344436	0.0477947			0.294399	0.0416212	0.29019	0.0418503	0.293128	0.0421371	0.28535	0.0433823	0.304535	0.0426183	0.31072	0.0430199	0.314676	0.0435388	0.309859	0.0432114	0.312477	0.0437959	0.286423	0.0438101	0.318736	0.043824
														0.346693	0.048	0.347282	0.048	0.346108	0.048			0.297453	0.0415929	0.294387	0.0417908	0.296265	0.0420934	0.284252	0.043184	0.307039	0.0426393	0.312598	0.0430634	0.31649	0.043577	0.312294	0.0432447	0.314717	0.0437874	0.293224	0.0437237	0.320071	0.0438951
														0.346693	0.048	ConcBand	ConcBand	ConcBand	ConcBand			0.300763	0.0415969	0.298936	0.0417613	0.299666	0.0420747	0.28339	0.0429891	0.309751	0.0426964	0.314631	0.0431367	0.318455	0.0436437	0.314931	0.0433146	0.317144	0.0438062	0.300597	0.0436667	0.32135	0.0439778
														IsoLine	IsoLine							0.304265	0.041633	0.30375	0.0417624	0.303265	0.0420812	0.282771	0.0427992	0.312619	0.0427885	0.316782	0.0432385	0.320533	0.0437376	0.31772	0.0434199	0.319712	0.0438519	0.308399	0.0436402	0.322539	0.0440698
																						0.30789	0.0417007	0.308734	0.0417941	0.30699	0.0421128	0.2824	0.042616	0.315588	0.0429138	0.319007	0.0433668	0.322683	0.0438569	0.320606	0.0435584	0.32237	0.0439236	0.316477	0.0436448	0.323605	0.0441685
																						0.311568	0.0417985	0.313791	0.0418558	0.310771	0.042169	0.28228	0.0424411	0.318598	0.0430699	0.321263	0.043519	0.324863	0.0439993	0.323533	0.0437275	0.325066	0.04402	0.324675	0.0436803	0.324519	0.0442713
																						0.315227	0.0419246	0.318824	0.0419462	0.314532	0.0422486	0.282413	0.0422759	0.321593	0.0432538	0.323507	0.0436923	0.327032	0.044162	0.326444	0.0439239	0.327748	0.0441391	0.332833	0.0437461	0.325257	0.0443754
																						0.318796	0.0420766	0.323733	0.0420637	0.318202	0.0423501	0.282797	0.0421218	0.324513	0.0434618	0.325694	0.0438832	0.329146	0.0443418	0.329282	0.0441438	0.330364	0.0442787	0.340792	0.0438409	0.325797	0.0444779
																						0.322206	0.0422514	0.328424	0.0422059	0.321708	0.0424715	0.283429	0.0419802	0.327302	0.0436899	0.327783	0.044088	0.331165	0.0445353	0.331993	0.0443829	0.332863	0.044436	0.348397	0.0439628	0.326126	0.0445761
																						0.325389	0.0424457	0.332805	0.04237	0.324983	0.0426104	0.284304	0.0418522	0.329905	0.0439338	0.329733	0.0443028	0.333048	0.0447386	0.334522	0.0446365	0.335196	0.0446079	0.3555	0.0441094	0.326234	0.0446672
																						0.328286	0.0426556	0.336791	0.0425529	0.327962	0.0427642	0.285413	0.0417391	0.332272	0.0441885	0.331505	0.0445233	0.334761	0.0449478	0.336823	0.0448998	0.337318	0.0447912	0.361964	0.044278	Cyan	Cyan
																						0.330838	0.0428772	0.340304	0.042751	0.330587	0.0429299	0.286749	0.0416416	0.334356	0.0444492	0.333065	0.0447453	0.336269	0.0451589	0.338848	0.0451675	0.339187	0.0449822	0.367661	0.0444652
																						0.332996	0.043106	0.343276	0.0429604	0.332808	0.0431042	0.288299	0.0415607	0.336118	0.0447108	0.334383	0.0449645	0.337543	0.0453677	0.340559	0.0454344	0.340768	0.0451773	0.372481	0.0446674
																						0.334718	0.0433377	0.345649	0.0431771	0.334582	0.0432837	0.29005	0.0414971	0.337522	0.0449682	0.335433	0.0451765	0.338558	0.0455701	0.341923	0.0456955	0.342029	0.0453726	0.376331	0.0448807
																						0.335971	0.0435677	0.347377	0.0433969	0.335873	0.0434649	0.291987	0.0414512	0.338542	0.0452165	0.336195	0.0453773	0.339295	0.0457623	0.342914	0.0459455	0.342946	0.0455643	0.379136	0.0451008
																						0.336731	0.0437915	0.348427	0.0436154	0.336657	0.0436444	0.294094	0.0414235	0.339158	0.0454506	0.336654	0.045563	0.339738	0.0459405	0.343511	0.0461797	0.3435	0.0457488	0.38084	0.0453236
																						0.336981	0.0440048	0.348777	0.0438285	0.336918	0.0438185	0.296352	0.0414142	0.339357	0.0456662	0.3368	0.0457298	0.33988	0.0461012	0.343703	0.0463934	0.343682	0.0459223	0.381411	0.0455446
																												0.298743	0.0414235
																												0.301246	0.0414511
																												0.303839	0.041497
																												0.306501	0.0415606
																												0.309208	0.0416414
																												0.311939	0.0417389
																												0.314668	0.041852
																												0.317374	0.0419799
																												0.320033	0.0421215
																												0.322622	0.0422755
																												0.32512	0.0424407
																												0.327504	0.0426157
																												0.329755	0.0427988
																												0.331853	0.0429887
																												0.333781	0.0431836
																												0.335522	0.0433819
																												0.337061	0.0435819
																												0.338385	0.043782
																												0.339483	0.0439803
																												0.340345	0.0441752
																												0.340965	0.0443651
																												0.341336	0.0445483
																												0.341455	0.0447232

## Sheet: PlotDat67
Source sheet	AYJ0309	0.416676	0.0522744	0.357544	0.0492638	0.370996	0.0508927	0.384582	0.0525242	0.398302	0.0541582	0.412158	0.0557947	0.426152	0.0574338	0.440284	0.0590754	0.346693	0.048	0.347282	0.048	0.346108	0.048	0.343738	0.0476374	0.45961	0.0534338	0.439796	0.0535948	0.469806	0.0537037	0.422161	0.0549544	0.42721	0.0548689	0.431566	0.0547923	0.419028	0.0554643	0.458104	0.0563264	0.438801	0.0554522	0.4282	0.0570129	0.418468	0.0559962	0.431023	0.056752
Plot name	Concordia58	0.388136	0.0527076	0.357523	0.0492824	0.370975	0.050912	0.38456	0.052544	0.398279	0.0541787	0.412134	0.0558158	0.426127	0.0574556	0.440258	0.0590978	0.346693	0.048	0.350054	0.0483389	0.346693	0.048072	0.357037	0.0492638	0.459184	0.0537301	0.439288	0.0539103	0.469271	0.0539441	0.421887	0.0551812	0.426876	0.0551242	0.431218	0.0550367	0.418783	0.0556747	0.457787	0.056582	0.438431	0.0557147	0.427971	0.05718	0.418283	0.0561554	0.430739	0.056994
Plot Type	1	0.414989	0.0532305	0.357463	0.0492995	0.370912	0.0509296	0.384494	0.0525623	0.398211	0.0541975	0.412064	0.0558353	0.426054	0.0574756	0.440182	0.0591184	0.350054	0.0484115	0.353423	0.04875	0.350054	0.0484841	0.370468	0.0508927	0.457931	0.053998	0.437784	0.0542024	0.467679	0.0541707	0.421089	0.055381	0.425895	0.0553546	0.430193	0.05526	0.418077	0.0558538	0.456873	0.0568002	0.437344	0.0559541	0.427324	0.057304	0.417751	0.0562909	0.429925	0.0571966
1st free col	61	0.39501	0.0537934	0.357369	0.0493137	0.370814	0.0509443	0.384392	0.0525775	0.398104	0.0542132	0.411953	0.0558514	0.425938	0.0574922	0.440062	0.0591355	0.353423	0.0488232	0.356801	0.0491612	0.353423	0.0488964	0.384031	0.0525242	0.455874	0.0542325	0.435313	0.0544654	0.465061	0.0543789	0.419784	0.05555	0.424288	0.0555555	0.428509	0.055458	0.416926	0.0559982	0.455378	0.0569768	0.43556	0.0561658	0.426272	0.0573827	0.416882	0.0564	0.428597	0.0573559
Sigma Level	1	0.39368	0.0538453	0.357247	0.0493239	0.370687	0.0509548	0.38426	0.0525884	0.397967	0.0542244	0.41181	0.055863	0.42579	0.0575041	0.439909	0.0591478	0.356801	0.0492351	0.360187	0.0495726	0.356801	0.0493089	0.397729	0.0541582	0.453055	0.0544288	0.431925	0.0546941	0.461469	0.0545648	0.417997	0.0556847	0.422085	0.0557232	0.426201	0.0556267	0.415351	0.056105	0.453333	0.0571084	0.433114	0.0563456	0.424834	0.0574145	0.415693	0.0564807	0.426781	0.0574689
Absolute Errs	FALSE	0.396408	0.0539561	0.357109	0.0493292	0.370543	0.0509603	0.38411	0.052594	0.397811	0.0542302	0.411648	0.055869	0.425621	0.0575103	0.439733	0.0591542	0.360187	0.0496471	0.363582	0.0499841	0.360187	0.0497215	0.411563	0.0557947	0.449527	0.0545831	0.427684	0.0548843	0.456972	0.0547247	0.415762	0.0557826	0.419328	0.0558544	0.423313	0.0557629	0.413383	0.0561722	0.450777	0.0571923	0.430054	0.0564901	0.42304	0.0573987	0.414208	0.0565313	0.424512	0.0575333
Symbol Type	1	0.395156	0.0540679	0.356965	0.0493292	0.370392	0.0509603	0.383953	0.052594	0.397648	0.0542302	0.411478	0.055869	0.425445	0.0575103	0.439551	0.0591542	0.363582	0.0500592	0.366985	0.0503958	0.363582	0.0501343	0.425533	0.0574338	0.44536	0.0546925	0.422674	0.055032	0.451658	0.0548556	0.413124	0.0558418	0.416073	0.0559464	0.419901	0.055864	0.41106	0.0561983	0.447759	0.0572269	0.426439	0.0565964	0.420923	0.0573357	0.412455	0.0565509	0.421835	0.057548
Inverse Plot	FALSE	0.427073	0.0546616	0.356826	0.0493239	0.370248	0.0509548	0.383803	0.0525884	0.397491	0.0542244	0.411315	0.055863	0.425276	0.0575041	0.439375	0.0591478	0.366985	0.0504716	0.370396	0.0508077	0.366985	0.0505473	0.439642	0.0590754	0.440635	0.0547549	0.416991	0.0551345	0.44563	0.0549548	0.410132	0.0558611	0.412382	0.0559976	0.416032	0.0559279	0.408427	0.0561831	0.444338	0.0572117	0.422339	0.0566624	0.418525	0.0572266	0.410469	0.0565391	0.418801	0.0575125
Color Plot	TRUE	0.401547	0.0545288	0.356705	0.0493137	0.370121	0.0509443	0.383671	0.0525775	0.397354	0.0542132	0.411173	0.0558514	0.425128	0.0574922	0.439222	0.0591355	0.370396	0.0508841	0.373816	0.0512197	0.370396	0.0509604	IsoLine	IsoLine	0.435444	0.054769	0.410746	0.0551898	0.439006	0.0550204	0.406847	0.0558402	0.408326	0.0560068	0.411781	0.0559534	0.405536	0.0561266	0.440582	0.0571468	0.417835	0.056687	0.415893	0.0570737	0.408288	0.0564962	0.41547	0.0574276
3D plot	FALSE	0.406489	0.0549718	0.35661	0.0492995	0.370023	0.0509296	0.383568	0.0525623	0.397247	0.0541975	0.411062	0.0558353	0.425013	0.0574756	0.439102	0.0591184	0.373816	0.0512967	0.377244	0.0516319	0.373816	0.0513737			0.429887	0.0547345	0.404062	0.0551967	0.431914	0.0550512	0.403331	0.0557795	0.403986	0.055974	0.407231	0.0559401	0.402444	0.0560301	0.436562	0.0570335	0.413013	0.0566695	0.413078	0.0568799	0.405954	0.0564228	0.411906	0.0572949
Linear	FALSE	0.400457	0.0549374	0.35655	0.0492824	0.36996	0.050912	0.383503	0.052544	0.39718	0.0541787	0.410991	0.0558158	0.42494	0.0574556	0.439026	0.0590978	0.377244	0.0517095	0.380682	0.0520442	0.377244	0.0517872			0.424073	0.0546521	0.397067	0.0551553	0.424493	0.0550466	0.399653	0.0556801	0.399445	0.0558998	0.40247	0.0558881	0.399209	0.0558954	0.432358	0.056874	0.407969	0.0566103	0.410135	0.0566489	0.403514	0.0563206	0.40818	0.0571171
Data Range	BZ3:CD18	0.403523	0.054974	0.35653	0.0492638	0.369939	0.0508927	0.383481	0.0525242	0.397157	0.0541582	0.410967	0.0557947	0.424915	0.0574338	0.439	0.0590754	0.380682	0.0521225	0.384127	0.0524567	0.380682	0.0522008			0.418115	0.0545235	0.389899	0.0550661	0.416887	0.0550066	0.395885	0.0555439	0.394792	0.0557855	0.397592	0.0557985	0.395895	0.0557251	0.428051	0.0566715	0.402799	0.0565107	0.40712	0.0563853	0.401014	0.0561915	0.404362	0.0568976
Filled Symbols	FALSE	0.405824	0.0556633	0.35655	0.0492452	0.36996	0.0508735	0.383503	0.0525043	0.39718	0.0541377	0.410991	0.0557735	0.42494	0.057412	0.439026	0.059053	0.384127	0.0525356	0.387581	0.0528694	0.384127	0.0526146			0.412129	0.0543511	0.382696	0.0549311	0.409244	0.0549321	0.392099	0.0553737	0.390117	0.0556335	0.39269	0.0556731	0.392567	0.0555226	0.423725	0.0564299	0.397605	0.0563724	0.404094	0.0560942	0.398503	0.0560379	0.400529	0.0566406
ConcAge	TRUE	0.41033	0.0558519	0.35661	0.049228	0.370023	0.0508558	0.383568	0.052486	0.397247	0.0541188	0.411062	0.0557541	0.425013	0.057392	0.439102	0.0590323	0.387581	0.052949	0.391044	0.0532822	0.387581	0.0530285			0.406232	0.0541383	0.3756	0.0547528	0.401713	0.0548244	0.388371	0.0551728	0.385512	0.0554467	0.38786	0.0555143	0.38929	0.0552918	0.419464	0.0561539	0.392488	0.0561983	0.401114	0.0557812	0.39603	0.0558629	0.396753	0.0563512
ConcSwap	FALSE	0.414345	0.0559945	0.356705	0.0492138	0.370121	0.0508411	0.383671	0.0524708	0.397354	0.0541031	0.411173	0.055738	0.425128	0.0573753	0.439222	0.0590152	0.391044	0.0533624	0.394516	0.0536952	0.391044	0.0534426			0.400538	0.0538891	0.368747	0.0545347	0.39444	0.0546857	0.384771	0.054945	0.381065	0.0552288	0.383197	0.0553251	0.386126	0.0550371	0.415351	0.0558488	0.387547	0.0559917	0.398239	0.0554525	0.393643	0.0556699	0.393109	0.056035
1st Symbol-row	1	0.411324	0.0560364	0.356826	0.0492037	0.370248	0.0508306	0.383803	0.05246	0.397491	0.0540919	0.411315	0.0557264	0.425276	0.0573634	0.439375	0.059003	0.394516	0.053776	0.397996	0.0541084	0.394516	0.0538569			0.395158	0.0536086	0.362271	0.054281	0.387567	0.0545187	0.381371	0.0546947	0.376864	0.0549839	0.378791	0.0551093	0.383139	0.0547636	0.411466	0.0555206	0.382879	0.0557566	0.395524	0.0551144	0.391389	0.0554626	0.389668	0.0556981
		IsoLine	IsoLine	0.356965	0.0491984	0.370392	0.0508251	0.383953	0.0524543	0.397648	0.0540861	0.411478	0.0557204	0.425445	0.0573572	0.439551	0.0589966	0.397996	0.0541898	0.401485	0.0545217	0.397996	0.0542713			0.390197	0.0533021	0.356299	0.0539967	0.381228	0.0543266	0.378237	0.054427	0.372991	0.0547168	0.374728	0.054871	0.380385	0.0544765	0.407885	0.0551756	0.378574	0.0554976	0.393023	0.0547735	0.389311	0.0552452	0.386497	0.0553472
				0.357109	0.0491984	0.370543	0.0508251	0.38411	0.0524543	0.397811	0.0540861	0.411648	0.0557204	0.425621	0.0573572	0.439733	0.0589966	0.401485	0.0546038	0.404982	0.0549352	0.401485	0.0546859			0.385751	0.0529756	0.350947	0.0536873	0.375546	0.0541132	0.375429	0.0541469	0.36952	0.0544328	0.371086	0.0546149	0.377919	0.0541815	0.404678	0.0548207	0.374716	0.0552198	0.390783	0.0544365	0.38745	0.0550217	0.383657	0.0549889
				0.357247	0.0492037	0.370687	0.0508306	0.38426	0.05246	0.397967	0.0540919	0.41181	0.0557264	0.42579	0.0573634	0.439909	0.059003	0.404982	0.0550179	0.408489	0.0553488	0.404982	0.0551007			0.381907	0.0526354	0.346319	0.0533588	0.370632	0.0538826	0.373002	0.0538599	0.366519	0.0541373	0.367938	0.054346	0.375788	0.0538842	0.401906	0.0544627	0.37138	0.0549285	0.38885	0.0541099	0.385843	0.0547966	0.381204	0.0546304
				0.357369	0.0492138	0.370814	0.0508411	0.384392	0.0524708	0.398104	0.0541031	0.411953	0.055738	0.425938	0.0573753	0.440062	0.0590152	0.408489	0.0554322	0.412004	0.0557626	0.408489	0.0555156			0.37874	0.0522882	0.342504	0.0530177	0.366581	0.0536393	0.371003	0.0535716	0.364047	0.0538362	0.365344	0.0540695	0.374034	0.0535906	0.399624	0.0541085	0.368632	0.0546294	0.38726	0.0538001	0.38452	0.0545742	0.379185	0.0542786
				0.357463	0.049228	0.370912	0.0508558	0.384494	0.052486	0.398211	0.0541188	0.412064	0.0557541	0.426054	0.057392	0.440182	0.0590323	0.412004	0.0558466	0.415528	0.0561766	0.412004	0.0559307			0.376311	0.0519407	0.339578	0.0526705	0.363472	0.053388	0.369472	0.0532877	0.362152	0.0535352	0.363354	0.0537908	0.372692	0.0533062	0.397877	0.0537652	0.366524	0.0543284	0.386044	0.0535131	0.383507	0.0543589	0.37764	0.0539403
				0.357523	0.0492452	0.370975	0.0508735	0.38456	0.0525043	0.398279	0.0541377	0.412134	0.0557735	0.426127	0.057412	0.440258	0.059053	0.415528	0.0562612	0.41906	0.0565907	0.415528	0.0563459			0.374668	0.0515998	0.337597	0.0523241	0.361366	0.0531337	0.368437	0.0530135	0.36087	0.0532403	0.362008	0.0535153	0.371786	0.0530367	0.396698	0.0534392	0.365098	0.0540313	0.385226	0.0532545	0.382824	0.0541548	0.376599	0.0536221
				0.357544	0.0492638	0.370996	0.0508927	0.384582	0.0525242	0.398302	0.0541582	0.412158	0.0557947	0.426152	0.0574338	0.440284	0.0590754	0.41906	0.056676	0.422602	0.057005	0.41906	0.0567613			0.373843	0.0512719	0.336599	0.0519851	0.360304	0.0528813	0.36792	0.0527546	0.360227	0.0529571	0.361331	0.0532484	0.371336	0.0527872	0.39611	0.0531371	0.364381	0.0537438	0.384822	0.0530293	0.382484	0.053966	0.376081	0.0533303
				ConcTikEll	ConcTikEll	ConcTikEll	ConcTikEll	ConcTikEll	ConcTikEll	ConcTikEll	ConcTikEll	ConcTikEll	ConcTikEll	ConcTikEll	ConcTikEll	ConcTikEll	ConcTikEll	0.422602	0.0570909	0.426152	0.0574194	0.422602	0.0571769			0.373851	0.0509636	0.336605	0.0516602	0.360306	0.0526357	0.36793	0.0525159	0.360235	0.0526913	0.361337	0.0529953	0.371349	0.0525627	0.396124	0.0528646	0.364388	0.0534716	0.384839	0.0528419	0.382494	0.0537961	0.376098	0.0530704
																		0.426152	0.057506	0.429711	0.057834	0.426152	0.0575926			0.374693	0.0506808	0.337613	0.0513556	0.361373	0.0524016	0.368468	0.052302	0.360894	0.0524479	0.362026	0.0527609	0.371826	0.0523674	0.396741	0.0526271	0.365118	0.0532201	0.385278	0.052696	0.382853	0.0536484	0.376649	0.0528476
																		0.429711	0.0579213	0.433279	0.0582488	0.429711	0.0580085			0.376352	0.050429	0.339605	0.0510774	0.363483	0.0521837	0.369522	0.0521172	0.362192	0.0522317	0.363384	0.0525497	0.372756	0.0522053	0.397949	0.0524292	0.366557	0.0529939	0.38613	0.0525944	0.383556	0.0535258	0.377722	0.0526662
																		0.433279	0.0583367	0.436856	0.0586638	0.433279	0.0584246			0.378796	0.0502131	0.342542	0.0508309	0.366595	0.0519861	0.371072	0.051965	0.364102	0.0520469	0.365384	0.0523659	0.374123	0.0520794	0.399723	0.0522747	0.368677	0.0527977	0.387378	0.052539	0.384587	0.0534307	0.379298	0.0525297
																		0.436856	0.0587523	0.440442	0.0590789	0.436856	0.0588408			0.381977	0.0500374	0.346366	0.050621	0.37065	0.0518128	0.373088	0.0518484	0.366587	0.0518971	0.367989	0.0522131	0.375899	0.0519922	0.402029	0.0521668	0.371437	0.0526352	0.388998	0.052531	0.385927	0.0533649	0.381345	0.0524408
																		0.440442	0.059168	0.444036	0.0594941	0.440442	0.0592572			0.385834	0.0499051	0.351003	0.0504516	0.375567	0.0516671	0.37553	0.0517696	0.369601	0.0517852	0.371146	0.0520942	0.37805	0.0519454	0.404823	0.0521073	0.374783	0.0525095	0.390959	0.0525705	0.38755	0.0533297	0.383825	0.0524011
																		0.444036	0.0595839	0.44764	0.0599095	0.444036	0.0596737			0.390291	0.049819	0.356362	0.0503262	0.381252	0.0515518	0.378352	0.0517303	0.373082	0.0517135	0.374796	0.0520115	0.380533	0.0519399	0.40805	0.0520976	0.37865	0.0524231	0.393222	0.0526568	0.389424	0.0533258	0.386687	0.0524116
																		0.44764	0.06	0.448427	0.06	0.446858	0.06			0.395261	0.0497807	0.362341	0.0502471	0.387593	0.0514692	0.381498	0.0517311	0.376965	0.0516832	0.378866	0.0519667	0.383302	0.0519759	0.411648	0.0521378	0.382962	0.0523777	0.395743	0.0527881	0.391513	0.0533532	0.389877	0.0524719
																		0.44764	0.06	ConcBand	ConcBand	ConcBand	ConcBand			0.400648	0.0497909	0.368821	0.0502159	0.394468	0.0514208	0.384907	0.051772	0.381173	0.051695	0.383277	0.0519606	0.386301	0.0520525	0.415545	0.0522271	0.387637	0.0523742	0.398473	0.0529619	0.393776	0.0534115	0.393333	0.052581
																		IsoLine	IsoLine							0.406348	0.0498495	0.375677	0.0502332	0.401742	0.0514077	0.388513	0.0518523	0.385625	0.0517487	0.387944	0.0519933	0.389472	0.0521684	0.419667	0.0523638	0.392582	0.0524126	0.401359	0.0531748	0.396169	0.0534995	0.396987	0.0527366
																										0.412248	0.0499553	0.382776	0.0502987	0.409274	0.0514301	0.392245	0.0519703	0.390233	0.0518431	0.392775	0.0520642	0.392755	0.0523213	0.423933	0.0525452	0.397701	0.0524922	0.404345	0.0534227	0.398645	0.0536155	0.400768	0.0529357
																										0.418234	0.0501062	0.389979	0.0504111	0.416917	0.0514875	0.396031	0.0521239	0.394908	0.0519766	0.397678	0.052172	0.396083	0.0525081	0.42826	0.0527678	0.402896	0.0526114	0.407373	0.0537007	0.401157	0.0537572	0.404603	0.0531746
																										0.424191	0.0502993	0.397146	0.0505681	0.424523	0.0515788	0.399797	0.0523099	0.39956	0.0521464	0.402555	0.0523145	0.399394	0.0527254	0.432564	0.0530273	0.408064	0.052768	0.410383	0.0540035	0.403655	0.0539219	0.408417	0.0534484
																										0.430001	0.0505308	0.404138	0.0507668	0.431943	0.0517023	0.40347	0.0525248	0.404097	0.0523493	0.407313	0.0524889	0.402623	0.0529687	0.436761	0.0533186	0.413105	0.0529588	0.413318	0.0543252	0.40609	0.0541063	0.412135	0.053752
																										0.435551	0.0507963	0.410818	0.0510033	0.439033	0.0518555	0.406978	0.0527644	0.408431	0.0525813	0.411859	0.0526919	0.405706	0.0532335	0.44077	0.053636	0.417922	0.0531802	0.41612	0.0546594	0.408417	0.0543069	0.415686	0.0540793
																										0.440734	0.0510905	0.417057	0.0512729	0.445655	0.0520355	0.410254	0.0530241	0.412478	0.0528379	0.416104	0.0529195	0.408583	0.0535144	0.444512	0.0539734	0.422419	0.0534278	0.418734	0.0549997	0.410588	0.0545198	0.419001	0.0544241
																										0.445449	0.0514078	0.422733	0.0515705	0.45168	0.0522387	0.413232	0.0532987	0.416159	0.0531141	0.419966	0.0531673	0.4112	0.0538062	0.447914	0.0543241	0.426511	0.0536969	0.42111	0.0553394	0.412562	0.0547408	0.422014	0.0547795
																										0.449604	0.051742	0.427735	0.0518902	0.456991	0.0524613	0.415856	0.0535829	0.419403	0.0534045	0.423369	0.0534304	0.413504	0.0541031	0.450911	0.0546815	0.430116	0.0539822	0.423202	0.055672	0.4143	0.0549657	0.424667	0.0551388
																										0.453118	0.0520865	0.431967	0.0522258	0.461485	0.0526988	0.418074	0.0538712	0.422146	0.0537036	0.426247	0.0537038	0.415451	0.0543992	0.453444	0.0550384	0.433166	0.0542781	0.424968	0.055991	0.415769	0.0551899	0.426908	0.0554948
																										0.455923	0.0524347	0.435346	0.0525708	0.465073	0.0529467	0.419844	0.054158	0.424335	0.0540054	0.428544	0.0539821	0.417003	0.0546889	0.455464	0.0553881	0.4356	0.0545789	0.426374	0.0562901	0.41694	0.0554093	0.428694	0.0558407
																										0.457964	0.0527797	0.437806	0.0529185	0.467687	0.0532001	0.42113	0.0544378	0.425927	0.054304	0.430216	0.0542598	0.418129	0.0549666	0.456931	0.0557235	0.437371	0.0548787	0.427394	0.0565636	0.41779	0.0556195	0.429991	0.0561697
																										0.459201	0.0531149	0.439299	0.053262	0.469275	0.0534541	0.421907	0.0547049	0.426892	0.0545938	0.43123	0.0545317	0.418809	0.0552267	0.457816	0.0560384	0.438445	0.0551717	0.428006	0.0568061	0.418303	0.0558164	0.430772	0.0564755
																										0.45961	0.0534338	0.439796	0.0535948	0.469806	0.0537037	0.422161	0.0549544	0.42721	0.0548689	0.431566	0.0547923	0.419028	0.0554643	0.458104	0.0563264	0.438801	0.0554522	0.4282	0.0570129	0.418468	0.0559962	0.431023	0.056752
[truncated: 10 more columns]

[truncated: 6 more sheets: PlotDat68, PlotDat69, PlotDat70, PlotDat71, PlotDat72, PlotDat54]
