# Supplementary material
Source: publisher figshare collection journal article supplement (https://gsapubs.figshare.com/ndownloader/files/23319197)
Supplement: Supplementary file 1 [file 23319197 › Table-DR3.xlsx]

## Sheet: Feuil1
DR2020099 accompanies Youbi, N., Ernst, R.E., Soderlund, U., Boumehdi, M.A., Ait Lahna, A., Tassinari, C.C.G., El Moume, W., and Bensalah, M.K., 2020, The Central Iapetus magmatic province: An updated review and link with the ca. 580 Ma Gaskiers glaciation,
in Adatte, T., Bond, D.P.G., and Keller, G., eds., Mass Extinctions, Volcanism, and Impacts: New Developments: Geological Society of America Special Paper 544, p. 35–66, https://doi.org/10.1130/2020.2544(02).
Table DR3: Selection of U-Pb geochronological data recording magmatic pulses of the Ediacaran-Cambrian CIMP in Laurentia. After the compilations of Cawood et al., (2001), Puffer (2002), Miller and Barr, (2004), Hodych and Cox, (2007), Burton and Southworth, (2010), Ernst and Bell, (2010); Ernst and Bleeker, (2010), McCausland et al., (2007; 2011), Burton and Southworth, (2010), Mitchell et al., (…
Region	Unit	Definition	Sample Id	Mineral	System	Method	type	Age	±2σ	2σ	Reference
				1		2	3	[Ma]
Southeastern Labrador, Canada	Long Range Dykes	North-northeast-trending Long Rang dykes		Zrn/Bdl	U-Pb	TIMS	up.int	615	±2	2	Kamo et al., (1989a)
Southeastern Labrador, Canada	Long Range Dykes	North-northeast-trending Long Rang dykes		Zrn/Bdl	U-Pb	TIMS	conc	615	±4/6	4	Kamo and Gower (1994)
The Birchy Complex of the Baie Verte Peninsula, northwestern Newfoundland, Canada	The Birchy Complex of the Baie Verte Peninsula	Metagabbro	Sample DC 09/08-30	Zrn	U-Pb	LA-ICP-MS		563.9	±7.5	7.5	van Staal et al., (2013)
The Birchy Complex of the Baie Verte Peninsula, northwestern Newfoundland, Canada	The Birchy Complex of the Baie Verte Peninsula	Metagabbro	Sample SNB-06-017 (z9251)	Zrn	U-Pb	ID-TIMS		558.3	±0.7	0.7	van Staal et al., (2013)
The Birchy Complex of the Baie Verte Peninsula, northwestern Newfoundland, Canada	The Birchy Complex of the Baie Verte Peninsula	Tuffaceous intermediate schist	Sample DC 09/08-41	Zrn	U-Pb	LA-ICP-MS		556.3	±3.6	3.6	van Staal et al., (2013)
Western Newfoundland	The Skinner Cove Formation of western Newfoundland	Skinner Cove ankaramite flow		Zrn	U-Pb	TIMS		550.5	±3/2	3	McClausland et al., (1997); Cawood et al., (2001)
Western Newfoundland	Hughes Lake complex/Round Pond Granite from Little North Pond	Round Pond Granite/A-type granitoids/The granite that yields a U-Pb zircon age of 602 ± 10Ma is associated with mafic and silicic volcanic rocks and metamorphic equivalents near Deer Lake in western Newfoundland.	Sample WF-39-82	Zrn	U-Pb	TIMS	207/206	602	±10	10	Williams et al. (1985)
Western Newfoundland	Lady Slipper Pluton	Lady Slipper Pluton/Tonalitic gneiss/A-type granitoids		Zrn	U-Pb	TIMS		555	±3/5	3	Cawood et al., (1996); Cawood et al., (2001)
Western Newfoundland	Hare Hill Granite	Hare Hill Granite/A-type granitoids		Zrn	U-Pb	TIMS		617	±8	8	van Berkel and Currie (1988)
St. Lawrence Promontory: Blair River Inlier, Northern Cape Breton Island, Nova Scotia, Canada	Blair River Inlier Dykes	Labrador Formation/Metamorphosed gabbroic dykes	Metagabbroic dyke 1/ SMB98-7	Zrn	U-Pb	TIMS		581	±6	6	Miller and Barr (2004)
St. Lawrence Promontory: Blair River Inlier, Northern Cape Breton Island, Nova Scotia, Canada	Blair River Inlier Dykes	Labrador Formation/Metamorphosed gabbroic dykes	Metagabbroic dyke 2/SMB98-8	Zrn	U-Pb	TIMS		576	±6	6	Miller and Barr (2004)
Southeastern Canada	Sept Iles Layered Mafic Intrusion	A granophyric segregation in the upper part of the Layered Series		Zrn	U-Pb	TIMS		565	±4	4	Higgins and van Breemen (1998)
Quebec Appalachians, Canada	Lac Matapédia basalts of the Quebec Appalachians, Canada	Lac Matapédia basalts	Sample L1	Zrn	U-Pb	LAM-ICP-MS		565	±6	6	Hodych and Cox, (2007)
Quebec Appalachians, Canada	Lac Matapédia basalts of the Quebec Appalachians, Canada	Lac Matapédia basalts	Sample L2	Zrn	U-Pb	LAM-ICP-MS		556	± 5	5	Hodych and Cox, (2007)
Quebec Appalachians, Canada	Mt. St.-Anselme basalts of the Quebec Appalachians, Canada	Mt. St.-Anselme basalts	Sample M1	Zrn	U-Pb	LAM-ICP-MS		550	± 7	7	Hodych and Cox, (2007)
The St Simeon mafic dykes (150 km NE of Quebec City)	The St Simeon mafic dykes/ This age is similar to a published LA-ICP-MS zircon age of 550 ± 7 Ma for the Mt. St-Anselme (Hodych and Cox, 2007) basalts, which supports previous inferences of (i) a genetic relationship between them, (ii) the penecontemporaneity of OIB-type mafic magmatism in East Laurentia and (iii) the existence of two late Ediacaran plumes that attended the final breakup of Rodin…	Mafic dyke		Bdl	U-Pb	TIMS		548	± 1	1	Pisarevsky et al., (2013)
Quebec Appalachians /Waterloo area, Quebec	The Tibbit Hill Formation	Comenditic metafelsites representing the only known silicic volcanic rocks in the predominantly basaltic Tibbit Hill Formation	W-06/Tibbit Hill volcanics	Zrn	U-Pb	TIMS	up.int	554	±4/2	4	Kumarapeli et al., (1989)
The Mont Rigaud Intrusion/ Syeno-granitic stock located in the St. Lawrence River–Ottawa River Graben	Mont Rigaud Alkaline Intrusion	The earliest intrusive phase of Mont Rigaud Alkaline Intrusion		Zrn	U-Pb	TIMS		563	± 14	14	Malka et al., (1996)
The Mont Rigaud Intrusion/ Syeno-granitic stock located in the St. Lawrence River–Ottawa River Graben	Mont Rigaud Alkaline Intrusion	Feldspar-hornblende syenite (unit 1) of Mont Rigaud Alkaline Intrusion	MR94-2	Zrn	U-Pb	TIMS	up.int	556	±15/12	15	Malka et al., (2000)
The Mont Rigaud Intrusion/ Syeno-granitic stock located in the St. Lawrence River–Ottawa River Graben	Mont Rigaud Alkaline Intrusion	Granite (unit 3) of Mont Rigaud Alkaline Intrusion	MR94-17	Zrn	U-Pb	TIMS	up.int	564	±10/8	10	Malka et al., (2000)
Grenville Province in the Canadian Shield	Callander alkaline carbonatite complex	Nepheline syenite from the Callander alkaline carbonatite complex		Zrn	U-Pb	TIMS		577	±1	1	S.L. Kamo et al., unpublished data in Kamo et al., (1995)
Grenville Province in the Canadian Shield	Callander alkaline carbonatite complex	Lamprophyre dyke inruding layered cone sheets of nepheline syenite and carbonatite		Rt/Spn			Pb-Pb isochron age	576	±5.3	5.3	Kamo et al. (1989b) in Symons and Chaisson (1991)
Grenville Province in the Canadian Shield	Callander alkaline carbonatite complex	Lamprophyre dyke inruding layered cone sheets of nepheline syenite and carbonatite		Rt/Spn			Pb-Pb isochron age	550	±4	4	Kamo et al. (1989b) in Symons and Chaisson (1991)
Ontario-Quebec	The 700 km long Grenville dyke swarm	East-West trending dolerite dyke, Western part	Dolerite GDS-102 Bellefeuille, Quebec	Bdl	U-Pb	TIMS	up.int	589	±3/2	3	Kamo et al., (1995)
Ontario-Quebec	The 700 km long Grenville dyke swarm	East-West trending dolerite dyke, Western part	Dolerite GDS90-16 Low, Quebec	Zrn/Bdl	U-Pb	TIMS	up.int	592	±3	3	Kamo et al., (1995)
Ontario-Quebec	The 700 km long Grenville dyke swarm	East-West trending dolerite dyke, Eastern part	Dolerite 89AD5 Deux-Rivières, Ontario	Bdl	U-Pb	TIMS	up.int	586	±4	4	Kamo et al., (1995)
Ontario-Quebec	The 700 km long Grenville dyke swarm	East-West trending dolerite dyke, Eastern part	U-Pb baddeleyite and zircon ages for the three diabase dykes from widely spaced localities within the Grenville dyke swarm	Zrn/Bdl	U-Pb	TIMS	Mean	590	±2/1	2	Kamo et al., (1995)
Ontario-Quebec	The 700 km long Grenville dyke swarm	East-West trending dolerite dyke, Eastern part	Dolerite located at NNW Ottawa	Bdl	U-Pb	TIMS		586.3	±0.7	0.7	Buchan and Hamilton (2009)
Ontario-Quebec	The 700 km long Grenville dyke swarm	North-East trending dolerite dyke, Eastern part	Dolerite located at NNW Kingston	Bdl	U-Pb	TIMS		584	±1	1	Buchan et al., (2011)
Ontario-Quebec	The 700 km long Grenville dyke swarm	East-West trending dolerite dyke, Western part	Dolerite Augusta Lake dyke, GD2	Bdl	U-Pb	TIMS	up.int	584.8	±0.6	0.6	Halls et al., (2015)
Ontario-Quebec	The 700 km long Grenville dyke swarm	East-West trending dolerite dyke, Western part	Dolerite Sand Bay dyke, GD29	Bdl	U-Pb	TIMS	up.int	585.2	±0.8	0.8	Halls et al., (2015)
Ontario-Quebec	The 700 km long Grenville dyke swarm	East-West trending dolerite dyke, Western part	Dolerite Key River dyke, GD15	Bdl	U-Pb	TIMS	up.int	587.3	±0.7	0.7	Halls et al., (2015)
Ontario-Quebec	The 700 km long Grenville dyke swarm	East-West trending dolerite dyke, Western part	Dolerite Grenville dyke at Mattawa	Bdl	U-Pb	TIMS	206/238	576.6	±0.7	0.7	Halls et al., (2015)
Ontario-Quebec	The 700 km long Grenville dyke swarm	East-West trending dolerite dyke, Western part	Dolerite Grenville dyke at Mattawa collected at the same site (dolerite 89AD5 Deux-Rivières, Ontario) of Kamo et al., 1995	Bdl	U-Pb	TIMS	206/238	579.5	±1.4	1.4	Halls et al., (2015)
Northwest Vermont	The Pinney Hollow Formation	Metafelsite from the Pinney Hollow Formation	Sample RO-314B from metafelsite of the Pinney Hollow Formation	Zrn	U-Pb	TIMS	up.int	571	±5	5	Walsh & Aleinikoff, (1999)
Northwest Vermont	The Pinney Hollow Formation	Metafelsite from the Pinney Hollow Formation	Sample RO-314B from metafelsite of the Pinney Hollow Formation	Zrn	U-Pb	TIMS	207/206	569.6	±1.2	1.2	Walsh & Aleinikoff, (1999)
Northwest Vermont	The Pinney Hollow Formation	Metafelsite from the Pinney Hollow Formation	Sample RO-314B from metafelsite of the Pinney Hollow Formation	Zrn	U-Pb	TIMS	up.int	573	±12	12	Walsh & Aleinikoff, (1999)
Neoproterozoic A-type granitoids of the central and southern Appalachians	Neoproterozoic A-type granitoids of the central and southern Appalachians	Yonkers Gneiss in the Manhattan prong of southeastern New York	YG91-2	Zrn	U-Pb	TIMS		563	± 2	2	Tollo et al., (2004)
Neoproterozoic A-type granitoids of the central and southern Appalachians	Neoproterozoic A-type granitoids of the central and southern Appalachians	Pound Ridge Granite Gneiss in the Manhattan prong of southeastern New York	PR90-1	Zrn	U-Pb	TIMS		562	± 5	5	Tollo et al., (2004)
Neoproterozoic intyrusive rocks of Reading Prong in Pennsylvania	Reading Prong dyke swarm/Swabia Creek igneous suite	Felsic dyke belonging to a group of slightly metamorphosed mafic and felsic dykes exposed in an old mine in the southernmost Reading Prong in Pennsylvania		Zrn	U-Pb	TIMS		602.3	±2	2	Smith (2003) in Burton & Southworth (2010)
The Blue Ridge anticlinorium in the central and southern Appalachians	The Catoctin Formation	Metarhyolites (interpreted as lava flows) of the Catoctin Formation at South Mountain, Pennsylvania	Sample 1 (SM-10-89). Freedman (1967) mapped three units of metarhyolite with a combined thickness of about 520 m overlying greenstone with a minimum total thickness ofabout 170 m. The Fickels Hill sample/sample 1 (SM-10-89) is from the lowest of the three metarhyolite units. However, structural complications and generally poor exposures make the thickness estimates and proposed stratigraphy of th…	Zrn	U-Pb	SHRIMP	up.int	564.3	±9.3	9.3	Aleinikoff et al., (1991); Aleinikoff et al., (1995)
The Blue Ridge anticlinorium in the central and southern Appalachians	The Catoctin Formation	Metarhyolites (interpreted as lava flows) of the Catoctin Formation at South Mountain, Pennsylvania	Sample 1 (SM-10-89). Freedman (1967) mapped three units of metarhyolite with a combined thickness of about 520 m overlying greenstone with a minimum total thickness ofabout 170 m. The Fickels Hill sample/sample 1 (SM-10-89) is from the lowest of the three metarhyolite units. However, structural complications and generally poor exposures make the thickness estimates and proposed stratigraphy of th…	Zrn	U-Pb	SHRIMP	207/206	560	±3	3	Aleinikoff et al., (1995)
The Blue Ridge anticlinorium in the central and southern Appalachians	The Catoctin Formation	Metarhyolites (interpreted as lava flows) of the Catoctin Formation at South Mountain, Pennsylvania	Sample 1 (SM-10-89). Freedman (1967) mapped three units of metarhyolite with a combined thickness of about 520 m overlying greenstone with a minimum total thickness ofabout 170 m. The Fickels Hill sample/sample 1 (SM-10-89) is from the lowest of the three	Spn	U-Pb	SHRIMP	206/238	577	±4	4	Aleinikoff et al., (1995)
The Blue Ridge anticlinorium in the central and southern Appalachians	The Catoctin Formation	Metarhyolites (interpreted as lava flows) of the Catoctin Formation near Bluemont, Virginia	Sample 2 (B-1-89). The Catoctin Formation in northern Virginia overlies the Late Proterozoic clastic Swift Run Formation (sample 2 = B-1-89 was collected just a few meters above the contact) and Middle Proterozoic gneisses	Zrn	U-Pb	SHRIMP	up.int	570	±12	12	Aleinikoff et al., (1995)
The Blue Ridge anticlinorium in the central and southern Appalachians	The Catoctin Formation	Felsite dyke in Catoctin Formation, Point of Rocks, Virginia/This hypabyssal felsic dyke (rhyolite) is intruding Middle Proterozoic (Grenville) granitic gneiss basement and presumed to feed the Catoctin flows	Sample 3 (BR-38-90)	Zrn	U-Pb	SHRIMP	up.int	571.5	±4.7	4.7	Aleinikoff et al., (1991); Aleinikoff et al., (1995)
The Catoctin Formation of the Shenandoah National Park Region, Virginia	The Catoctin Formation	Bed of metarhyolite tuffs in the middle parts of the Catoctin Formation		Zrn	U-Pb	SHRIMP		568	±4	4	J.N. Aleinikoff, USGS, unpublished data, (2009) in Southworth et al., (2009a)
The Catoctin Formation in Virginia	The Catoctin Formation	Porphyritic metarhyolite at the top of the Catoctin formation in Pennsylvania		Zrn	U-Pb	SHRIMP		559	±5	5	Southworth and Aleinikoff, (2007) in Southworth et al., (2009a)
The Blue Ridge anticlinorium in the central and southern Appalachians	The Catoctin Formation	Metarhyolite dyke in northern Virginia/Shenandoah Massif		Zrn	U-Pb	SHRIMP		567	± 4	4	Revised (i.e., recalculated) from Aleinikoff et al., (1995) by Burton & Southworth (2010)/J.N. Aleinikoff, USGS, unpublished data, (2009) in Southworth et al., (2009)
The Blue Ridge anticlinorium in the central and southern Appalachians	The Catoctin Formation	Metarhyolite dyke in northern Virginia/Shenandoah Massif		Zrn	U-Pb	SHRIMP		555	± 4	4	Revised (i.e., recalculated) from Aleinikoff et al., (1995) by Burton & Southworth (2010)/J.N. Aleinikoff, USGS, unpublished data, (2009) in Southworth et al., (2009)
Shenandoah Massif	The Catoctin Formation	Felsic volcanic rocks		Zrn	U-Pb	SHRIMP		ca. 571			Southworth et al., (2009b) in Burton & Southworth (2010)
Shenandoah Massif	The Catoctin Formation	Felsic volcanic rocks		Zrn	U-Pb	SHRIMP		ca. 563			Southworth et al., (2009b) in Burton & Southworth (2010)
Mafic and ultramafic rocks that have been tectonically imbricated on the southwest margin of the Precordillera terrane, western Argentina	Late Proterozoic microgabbro	Microgabbro from massive diabase	Sample 1 (USP95-51), microgabbro from the massive diabase, includes two separate samples collected in 1995 (fractions a–c) and 1997 (fractions d–g) from precisely the same site and are considered as a single sample.	Zrn	U-Pb	LA-ICP-MS		576	± 17	17	Thomas et al., (2000)
Cambrian Wichita Igneous Province in the Southern Oklahoma rift zone	Wichita Mts.(Quanah Mt.) Oklahoma pegmatite	Pegmatite/Wichita Mts.(Quanah Mt.) Oklahoma	M-101	Zrn	U-Pb	SIMS	207/206	550	± 25	25	Tilton et al., (1957), Tilton et al., (1962)
Cambrian Wichita Igneous Province in the Southern Oklahoma rift zone	Wichita Mts.(Quanah Mt.) Oklahoma pegmatite	Pegmatite/Wichita Mts.(Quanah Mt.) Oklahoma	M-101	Zrn	U-Pb	SIMS	207/206	560	± 25	25	Tilton et al., (1957), Tilton et al., (1962)
Cambrian Wichita Igneous Province in the Southern Oklahoma rift zone	Bally Mt., Oklahoma, Carlton rhyolite	Rhyolite/Bally Mt., Oklahoma	M-53	Zrn	U-Pb	SIMS	206/238	505			Tilton et al., (1957), Tilton et al., (1962)
Cambrian Wichita Igneous Province in the Southern Oklahoma rift zone	Mount Sheridan Gabbro and its associated pegmatitic pods	Pegmatitic pods in Mount Sheridan Gabbro	WM-2	Zrn	U-Pb	TIMS		552	± 7	7	Bowring & Hoppe, (1982)
Cambrian Wichita Igneous Province in the Southern Oklahoma rift zone	Wichita granites	Wichita granites		Zrn	U-Pb	TIMS		533	±1	1	Wright et al., (1996); see also Hanson et al., (2013)
Cambrian Wichita Igneous Province in the Southern Oklahoma rift zone	Wichita granites	A rhyolite xenolith within the Wichita granites		Zrn	U-Pb	TIMS		530	±1	1	Wright et al., (1996); see also Hanson et al., (2013)
Cambrian Wichita Igneous Province in the Southern Oklahoma rift zone	Rhyolites exposed in the Arbuckle Mountains	Rhyolites exposed in the Arbuckle Mountains		Zrn	U-Pb	TIMS		539	± 5	5	Thomas et al., (2000); see also Hanson et al., (2013)
Cambrian Wichita Igneous Province in the Southern Oklahoma rift zone	Rhyolites exposed in the Arbuckle Mountains	Rhyolites exposed in the Arbuckle Mountains		Zrn	U-Pb	TIMS		536	± 5	5	Thomas et al., (2000); see also Hanson et al., 2013
Cambrian Wichita Igneous Province in the Southern Oklahoma rift zone	Rhyolites in the Wichita Mountains	Flows at the base and top of the rhyolite sequence at Bally Mountain		Zrn	U-Pb	TIMS		534			Hanson et al., (2009); see also Hanson et al., (2013)
Cambrian Wichita Igneous Province	Mount Sheridan Gabbro	Mount Sheridan Gabbro	Mount Sheridan Gabbro	Ttn	U-Pb	LA-ICP-MS		577	± 2	2	Hogan & Amato, (2015)
Cambrian Wichita Igneous Province	Mount Sheridan Gabbro	Large pegmatitic granite dykes that intrude the Mount Sheridan Gabbro	Large pegmatitic granite dikes that intrude the Mount Sheridan Gabbro	Zrn	U-Pb	LA-ICP-MS		535	± 2	2	Hogan & Amato, (2015)
Cambrian Wichita Igneous Province	The Mount Scott Granite at Rush Lake	The Mount Scott Granite at Rush Lake	The Mount Scott Granite	Zrn	U-Pb	LA-ICP-MS		538	± 6	6	Hogan & Amato, (2015)
Cambrian Wichita Igneous Province	An unnamed flow-banded rhyolite, that lies unconformably beneath the Pratt Hill Quartzite	An unnamed flow-banded rhyolite, that lies unconformably beneath the Pratt Hill Quartzite	An unnamed flow-banded rhyolite	Zrn	U-Pb	LA-ICP-MS		534	± 5	5	Hogan & Amato, (2015)
Cambrian Wichita Igneous Province	“Rhyolite-dyke” at Medicine Park	“Rhyolite-dyke” at Medicine Park	The “rhyolite-dike” at Medicine Park, interpreted as one of the youngest felsic intrusions in this locale	Zrn	U-Pb	LA-ICP-MS		536	± 6	6	Hogan & Amato, (2015)
Wichita Igneous Province, (WIP) in the Wichita Mountains in SW Oklahoma		Anorthositic gabbro in the Glen Mountains Layered Complex		Zrn	U-Pb	CA-ID-TIMS		532.49	± 0.15	0.15	Wall et al., (2018)
Wichita Igneous Province, (WIP) in the Wichita Mountains in SW Oklahoma		Small granite pluton representing an early pulse of felsic magmatism in this part of the province		Zrn	U-Pb	CA-ID-TIMS		532.26	± 0.16	0.16	Wall et al., (2018)
Wichita Igneous Province, (WIP) in the Wichita Mountains in SW Oklahoma		Voluminous A type rhyolites and the extensive Mt. Scott sheet granite		Zrn	U-Pb	CA-ID-TIMS		530.98	± 0.15	0.15	Wall et al., (2018)
Wichita Igneous Province, (WIP) in the Wichita Mountains in SW Oklahoma		Voluminous A type rhyolites and the extensive Mt. Scott sheet granite		Zrn	U-Pb	CA-ID-TIMS		530.45	± 0.14	0.14	Wall et al., (2018)
Wichita Igneous Province, (WIP) in the Wichita Mountains in SW Oklahoma		Another rhyolite flow exposed in the Arbuckle Mountains ~100 km m to the SE		Zrn	U-Pb	CA-ID-TIMS		539.20	± 0.15	0.15	Wall et al., (2018)
(1) Mineral: Bdl: baddeleyite; Rt: Rutile; Spn: Sphene; Zrn: zircon
(2) Method : CA-TIMS: Chemical Abrasion- Thermal Ionization Mass Spectrometry; ID-TIMS : Isotope Dilution-Thermal Ionization Mass Spectrometry; LA-ICP-MS : Laser Ablation Inductively Coupled Plasma Mass Spectrometry; LAM-ICP-MS: Laser Ablation Microprobe- Inductively Coupled Plasma Mass Spectrometry; SHRIMP: Sensitive High Resolution Ion Microprobe; SIMS: Secondary Ion Mass Spectrometry; TIMS: Th…
(3) 206/238: avg. 206Pb/238U date; 207/206: avg. 207Pb/206Pb date; conc: conordia age or concordant analyses; up.int: upper intercept; lo.int.: lower intercept
