# Supplementary material
Source: publisher figshare collection journal article supplement (https://gsapubs.figshare.com/ndownloader/files/23319197)
Supplement: Supplementary file 1 [file 23319197 › Table-DR4.xlsx]

## Sheet: Feuil1
DR2020099 accompanies Youbi, N., Ernst, R.E., Soderlund, U., Boumehdi, M.A., Ait Lahna, A., Tassinari, C.C.G., El Moume, W., and Bensalah, M.K., 2020, The Central Iapetus magmatic province: An updated review and link with the ca. 580 Ma Gaskiers glaciation,
in Adatte, T., Bond, D.P.G., and Keller, G., eds., Mass Extinctions, Volcanism, and Impacts: New Developments: Geological Society of America Special Paper 544, p. 35–66, https://doi.org/10.1130/2020.2544(02).
Table DR4: Selection of U-Pb geochronological data recording magmatic pulses of the Ediacaran-Cambrian CIMP in Baltica (After the compilations of Bingen and Solli, 2009, Baird et al., 2014, Kirsh and Svenningsen, 2015, Shumlyanskyy et al., 2016, Kuznetsov et al., 2017 completed by this work). Radiometric dates are tabulated as reported in the original literature. No corrections have been made wit…
Megaunit1	Megaunit2	Definition	Sample Id	Mineral	System	Method	Type	Age	±2σ	2σ	Reference
				1		2	3	[Ma]
Kalak Nappes	Seiland Igneous Province	Nepheline syenite pegmatite, Litlebukta, Stjernøy		Zrn	U-Pb	TIMS	207/206	523	±2	2	Pedersen et al., (1989)
Kalak Nappes	Seiland Igneous Province	Nepheline syenite pegmatite, Storjordtind, Seiland		Zrn	U-Pb	TIMS	207/206	531	±2	2	Pedersen et al., (1989)
Kalak Nappes	Seiland Igneous Province	Øksfjord granite	RJR-02-129A	Mnz	U-Pb	TIMS	207/235	561	±4	4	Roberts et al., (2006)
Kalak Nappes	Seiland Igneous Province	Øksfjord granite	RJR-02-129A	Mnz	U-Pb	TIMS	207/235	561	±4	4	Roberts et al., (2006)
Kalak Nappes	Seiland Igneous Province	Hasvik Gabbro	RJR-02-29I	Zrn	U-Pb	TIMS	up.int	562	±6	6	Roberts et al., (2006)
Kalak Nappes	Seiland Igneous Province	Storelv granodiorite	RJR-02-37A	Zrn	U-Pb	TIMS	lo.int	563	±2	2	Roberts et al., (2006)
Kalak Nappes	Seiland Igneous Province	Øksfjord gabbro, foliated	RJR-02-03B	Zrn	U-Pb	TIMS	up.int	565	±9	9	Roberts et al., (2006)
Kalak Nappes	Seiland Igneous Province	Øksfjord monzonite	RJR-02-41C	Zrn	U-Pb	TIMS	up.int	565	±5	5	Roberts et al., (2006)
Kalak Nappes	Seiland Igneous Province	Øksfjord monzodiorite	RJR-02-40B	Zrn	U-Pb	TIMS	up.int	566	±4	4	Roberts et al., (2006)
Kalak Nappes	Seiland Igneous Province	Øksfjord pyroxenite	RJR-02-129D	Zrn	U-Pb	TIMS	up.int	566	±1	1	Roberts et al., (2006)
Kalak Nappes	Seiland Igneous Province	Storelv gabbro	RJR-02-37B	Zrn	U-Pb	TIMS	up.int	569	±5	5	Roberts et al., (2006)
Kalak Nappes	Seiland Igneous Province	Øksfjord norite	RJR-02-129C	Zrn	U-Pb	TIMS	up.int	569	±9	9	Roberts et al., (2006)
Kalak Nappes	Seiland Igneous Province	Breivikbotn Diorite	RJR-02-35	Zrn	U-Pb	TIMS	up.int	571	±4	4	Roberts et al., (2006)
Kalak Nappes	Vaddas Nappe?	Rappesvarre granitic gneiss, Gildetun, Kvænangen peninsula	C03-2	Zrn	U-Pb	TIMS	lo.int	602	±5	5	Corfu et al., (2007)
Barents Sea	Barents Sea Region	Dolerite dyke in Løkvikfjellet Gp, Hamningberg		Zrn	U-Pb	TIMS	up.int	567.1	±30	30	Roberts & Walker, (1997)
Kalak Nappe Complex	Seiland Igneous Province	Malignite-Silicocarbonatite, Breivikbotn Carbonatite Complex	RJR-02-34D and 34E	Zrn	U-Pb	ID-TIMS	up.int	574	±5	5	Roberts et al., (2010)
Kalak Nappe Complex	Seiland Igneous Province	Syenite gneiss, Breivikbotn Syenite Complex	RJR-03-116	Zrn	U-Pb	ID-TIMS	up.int	564	±5	5	Roberts et al., (2010)
Kalak Nappe Complex	Seiland Igneous Province	Syenite gneiss, Breivikbotn Syenite Complex	RJR-03-116	Zrn	U-Pb	ID-TIMS	up.int	565	±4	4	Roberts et al., (2010)
Kalak Nappe Complex	Seiland Igneous Province	Syenite gneiss, Breivikbotn Syenite Complex	RJR-03-116	Zrn	U-Pb	ID-TIMS		570	±2	2	Roberts et al., (2010)
Kalak Nappe Complex	Seiland Igneous Province	Nepheline syenite dyke, Breivikbotn Syenite Complex	RJR-04-236	Zrn	U-Pb	ID-TIMS		563	±3	3	Roberts et al., (2010)
Kalak Nappe Complex	Seiland Igneous Province	Syenitic gneiss, Breivikbotn Syenite Complex	RJR-04-245	Zrn	U-Pb	ID-TIMS		579	±14	14	Roberts et al., (2010)
Sveconorwegian crystalline basement of Baltica/Rogaland Anorthosite Complex	Egersund Basaltic Dike Swarm	Basaltic dyke trending ESE-WNW	B404-Dyke 4	Bdl	U-Pb	SIMS	207/206	616	±13	13	Bingen et al., (1998)
Seve–Kalak Superterrane/Seve Nappe Complex	Indre Troms dykes	Vistas Granite		Zrn	U-Pb	SIMS	207/206	605	±42	42	Paulsson & Andréasson, (2002)
Kebnekaise Massif	Kebne Dyke Complex	Meta-gabbro showing co-mingling magmatic textures with the metadolerite	WP-94a	Zrn	U-Pb	CA-TIMS	206/238	607.8	±1.5	1.5	Baird et al., (2014)
Kebnekaise Massif	Kebne Dyke Complex	Meta-gabbro showing co-mingling magmatic textures with the metadolerite	WP-94a	Zrn	U-Pb	CA-TIMS	206/238	598.4	±1.4	1.4	Baird et al., (2014)
Kebnekaise Massif	Kebne dolerite Dyke Complex	Meta-granitoid showing co-mingling magmatic textures with the metadolerite	WP-65	Zrn	U-Pb	CA-TIMS	206/238	603.8	±0.9	0.9	Baird et al., (2014)
Kebnekaise Massif	Kebne dolerite Dyke Complex	Meta-granitoid showing co-mingling magmatic textures with the metadolerite	WP-65	Zrn	U-Pb	CA-TIMS	206/238	596.9	±1.1	1.1	Baird et al., (2014)
Kebnekaise Massif	Kebne dolerite Dyke Complex	Oxide-apatite gabbronorite from Kebnekaise Intrusive Complex	K941	Zrn	U-Pb	SIMS		578	±9	9	Kirsh and Svenningsen, (2015)
Seve–Kalak Superterrane/Seve Nappe Complex	Sarek Mountains/Sarek Dyke Swarm	Small pod-like bodies of diorite to quartz diorite in the Sarek dykes	903-1P	Zrn	U-Pb	TIMS	206/238	608	±1	1	Svenningsen, (2001)
Seve–Kalak Superterrane/Seve Nappe Complex	Sarek Mountains/Sarek Dyke Swarm	Metagabbro from the Vaimok Lens	C05-38	Ttn	U-Pb	ID–TIMS	206/238	606.9	±2	2	Root & Corfu, (2012)
The Neoproterozoic glaciogenic Lillfja¨llet Formation, southern Swedish Caledonides		The Ottfjället mafic dyke swarm. The Lillfjället Formation in Sweden is penetrated by the Ottfjället dolerite dykes that are correlated with the Sarek Dyke Swarm in northern Sweden with an age of c. 608 Ma (Svenningsen 2001)		Bdl	U-Pb	TIMS		596	±4	4	Kumpulainen et al., (2016)
Western East European Craton	Neoproterozoic Volhynia-Brest Magmatic Province	Tholeiite basalt tuffs collected at the Upper Siawatycze Formation in the Kaplonosy IG-1 borehole at depth of 1455.5 m in eastern Poland.This tuff is believed to represent the last eruptive event related to the Volyn volcanism (Shumlyanskyy et al., 2016)	PL-92-77	Zrn	U-Pb	SHRIMP		551	±4	4	Compston et al., (1995)
Western East European Craton	Neoproterozoic Volhynia-Brest Magmatic Province	Tholeiite basalts collected at Ukraine		Zrn	U-Pb	SIMS		549	±29	29	Shumlyanskyy et al., (2006)
Western East European Craton	Neoproterozoic Volhynia-Brest Magmatic Province	A rhyolitic dacite flow, recovered from a drill hole in Belarus (1c at 1108–1157 m depth), that represents a rare suite of felsic rocks locally present in the Brest depression and stratigraphically occurring between the low- and high-Ti Ratne basalts Formation/ Ukraine		Zrn	U-Pb	SHRIMP		557	±9	9	Nosova et al., (2010)
Western East European Craton	Neoproterozoic Volhynia-Brest Magmatic Province	Tholeiite basalts sampled in drill hole 5881/ High-Ti Ratne basalts Formation/ Ukraine	Basalt 5881/51,5-53	Zrn	U-Pb	SIMS	206/238	573	±14	14	Shumlyanskyy et al., (2016)
Western East European Craton	Neoproterozoic Volhynia-Brest Magmatic Province	Tholeiite basalts sampled in drill hole 5881/ High-Ti Ratne basalts Formation/ Ukraine	Basalt 5881/51,5-53	Zrn	U-Pb	SIMS	up.int	577	±22	22	Shumlyanskyy et al., (2016)
Western East European Craton	Neoproterozoic Volhynia-Brest Magmatic Province	Tholeiite basalts sampled in drill hole 5881/ High-Ti Ratne basalts Formation/ Ukraine	Basalt 5881/51,5-53	Zrn	U-Pb	SIMS		513	±15	15	Shumlyanskyy et al., (2016)
Western East European Craton	Neoproterozoic Volhynia-Brest Magmatic Province	Dolerite sampled from sheet-like intrusive bodies located immediately beneath the Volyn flood basalt sequence	Dolerite sample 68/147-154	Bdl	U-Pb	SIMS	207/206	567	±61	61	Shumlyanskyy et al., (2016)
Western East European Craton	Neoproterozoic Volhynia-Brest Magmatic Province	Dolerite sampled from sheet-like intrusive bodies located immediately beneath the Volyn flood basalt sequence	Dolerite sample 68/147-154	Bdl	U-Pb	SIMS	206/238	626	±17	17	Shumlyanskyy et al., (2016)
Western East European Craton	Neoproterozoic Volhynia-Brest Magmatic Province	A rhyolitic dacite flow, recovered from a drill hole in Belarus (1c at 1108–1157 m depth), that represents a rare suite of felsic rocks locally present in the Brest depression and stratigraphically occurring between the low- and high-Ti Ratne basalts Formation	Rhyolitic dacite 1c	Zrn	U-Pb	SHRIMP	206/238	567	±11	11	Shumlyanskyy et al., (2016)
Western East European Craton	Neoproterozoic Volhynia-Brest Magmatic Province	A rhyolitic dacite flow, recovered from a drill hole in Belarus (1c at 1108–1157 m depth), that represents a rare suite of felsic rocks locally present in the Brest depression and stratigraphically occurring between the low- and high-Ti Ratne basalts Formation	Rhyolitic dacite 1c	Zrn	U-Pb	SHRIMP	206/238	540	±8	8	Shumlyanskyy et al., (2016)
Middle Urals (Eastern margin of the East European Platform)	Volcanic tuffs related to the Neoproterozoic Volhynia-Brest Magmatic Province	Volcanic tuffs from the upper part of the Starye Pechi Formation in the Vilukha Hole on the left side of the Us’va River. Diamictites are located at the bottom of the Starye Pechi Formation	Sample Sp 1	Zrn	U-Pb	LA-ICP-MS		561	± 36	36	Maslov et al., (2013)
Middle Urals (Eastern margin of the East European Platform)	Volcanic tuffs related to the Neoproterozoic Volhynia-Brest Magmatic Province	Volcanic tuffs from Perevalok Formation of the Sylvitsa Group, Central Urals. The formation is overlying the Starye Pechi Formation with the last level of diamictites	Sample 09 03 15	Zrn	U-Pb	LA-ICP-MS		567.2	± 3.9	3.9	Grazhdankin et al., (2011); Maslov et al., (2013)
Middle Urals (Eastern margin of the East European Platform)	Volcanic tuffs related to the Neoproterozoic Volhynia-Brest Magmatic Province	Ash interbed at the base of the Chernokamen Formation	Sample Us272	Zrn	U-Pb	SHRIMP		557	± 13	13	Ronkin et al., (2006); Maslov et al., (2013)
Middle Urals (Eastern margin of the East European Platform)	Volcanic tuffs related to the Neoproterozoic Volhynia-Brest Magmatic Province	Host mudstone of the ash interbed at the base of the Chernokamen Formation	Sample UsA	Zrn	U-Pb	SHRIMP		557	± 10	10	Ronkin et al., (2006); Maslov et al., (2013)
Middle Urals (Eastern margin of the East European Platform)	Volcanic tuffs related to the Neoproterozoic Volhynia-Brest Magmatic Province	Volcanic tuffs from the Ust’–Sylvitsa Formation at the top of the Sylvitsa Group. Since ash interbeds are located near the foot of sandstone of the Takata Formation, the deposits hosting these interbeds are related to the Ust’–Sylvitsa Formation at the top of the Sylvitsa Group.	Sample K10-161	Zrn	U-Pb	LA-ICP-MS		563.5	± 3.5	3.5	Kuznetsov et al., (2017)
Middle Urals (Eastern margin of the East European Platform)	Volcanic tuffs related to the Neoproterozoic Volhynia-Brest Magmatic Province	Pillow basalts from the basal part of the Tany Formation which constitute the first level with diamictites	Sample 11 m 007	Zrn	U-Pb	LA-ICP-MS		598.1	± 6.0	6.0	Maslov et al., (2013)
South Urals (Eastern margin of the East European Platform)	Volcanic tuffs related to the Neoproterozoic Volhynia-Brest Magmatic Province	Volcanic tuffs from the the Zimnii Bereg sequence/Erga Formation (Zolotica river in NW Russia, located within the Kola–Dvyna Rift System in the Baltic Shield)	Sample ZL129	Zrn	U-Pb	SHRIMP	conc	550.2	± 4.6	4.6	Iglesia Llanos et al., (2005)
South Urals (Eastern margin of the East European Platform)	Volcanic tuffs related to the Neoproterozoic Volhynia-Brest Magmatic Province	Volcanic tuffs from the the Zimnii Bereg sequence/Erga Formation (Zolotica river in NW Russia, located within the Kola–Dvyna Rift System in the Baltic Shield)	Sample ZL129	Zrn	U-Pb	SHRIMP	206/238	552.9	± 5.6	5.6	Iglesia Llanos et al., (2005)
South Urals (Eastern margin of the East European Platform)	Volcanic tuffs related to the Neoproterozoic Volhynia-Brest Magmatic Province	Volcanic tuffs from the the Zimnii Bereg sequence/Erga Formation (Zolotica river in NW Russia, located within the Kola–Dvyna Rift System in the Baltic Shield)	Sample ZL129	Zrn	U-Pb	SHRIMP	206/238	555.3	± 4.2	4.2	Iglesia Llanos et al., (2005)
South Urals (Eastern margin of the East European Platform)	Volcanic tuffs related to the Neoproterozoic Volhynia-Brest Magmatic Province	Volcanic tuffs from the the Zimnii Bereg sequence/Erga Formation (Zolotica river in NW Russia, located within the Kola–Dvyna Rift System in the Baltic Shield)	Sample ZL129	Zrn	U-Pb	SHRIMP	206/238	560.5	± 4.9	4.9	Iglesia Llanos et al., (2005)
South Urals (Eastern margin of the East European Platform)	Volcanic tuffs related to the Neoproterozoic Volhynia-Brest Magmatic Province	Volcanic tuffs from the uppermost Zigan Formation of the Ediacaran Asha Series, South Urals	X	Zrn	U-Pb	LA-ICP-MS	206/238	547.6	± 3.8	3.8	Levashova et al., (2013)
Southeastern part of the Belomorian area (Northeastern margin of the East European Platform)	Volcanic tuffs related to the Neoproterozoic Volhynia-Brest Magmatic Province	Volcanic tuffs from the base of the Verkhovka Formation	X	Zrn	U-Pb	LA-ICP-MS		558	± 1	1	M. W. Martin personal communication, 2001 to Grazhdankin in Grazhdankin (2004)
Southeastern part of the Belomorian area (Northeastern margin of the East European Platform)	Volcanic tuffs related to the Neoproterozoic Volhynia-Brest Magmatic Province	Volcanic tuffs from the Zimnegory Formation ( Zimnie Gory volcanic ash)		Zrn	U-Pb	LA-ICP-MS	up.int	555.4	± 1.6	1.6	Martin et al., (2000)
Southeastern part of the Belomorian area (Northeastern margin of the East European Platform)	Volcanic tuffs related to the Neoproterozoic Volhynia-Brest Magmatic Province	Volcanic tuffs from the Zimnegory Formation ( Zimnie Gory volcanic ash)		Zrn	U-Pb	LA-ICP-MS	up.int	555.4	±1.7	1.7	Martin et al., (2000)
Southeastern part of the Belomorian area (Northeastern margin of the East European Platform)	Volcanic tuffs related to the Neoproterozoic Volhynia-Brest Magmatic Province	Volcanic tuffs from the Zimnegory Formation ( Zimnie Gory volcanic ash)		Zrn	U-Pb	LA-ICP-MS	207/206	555.3	±0.3	0.3	Martin et al., (2000)
Southeastern part of the Belomorian area (Northeastern margin of the East European Platform)	Volcanic tuffs related to the Neoproterozoic Volhynia-Brest Magmatic Province	Volcanic tuffs from the Zimnegory Formation ( Zimnie Gory volcanic ash)	X	Zrn	U-Pb	LA-ICP-MS	conc	552.85	± 0.77	0.77	Revised (i.e., recalculated) from Martin et al., (2000) by Schmitz (2012)
(1) Mineral: Bdl: baddeleyite; Mnz: monazite; Zrn: zircon
(2) Method : CA-TIMS: Chemical Abrasion- Thermal Ionization Mass Spectrometry; ID-TIMS : Isotope Dilution-Thermal Ionization Mass Spectrometry; LA-ICP-MS : Laser Ablation Inductively Coupled Plasma Mass Spectrometry; LAM-ICP-MS: Laser Ablation Microprobe- Inductively Coupled Plasma Mass Spectrometry; SHRIMP: Sensitive High Resolution Ion Microprobe; SIMS: Secondary Ion Mass Spectrometry; TIMS: Th…
(3) 206/238: avg. 206Pb/238U date; 207/206: avg. 207Pb/206Pb date; 3D-iso: 3D isochron; conc: conordia age or concordant analyses; up.int: upper intercept; lo.int.: lower intercept; evap: evaporation method
