# Supplementary material
Source: publisher figshare collection journal article supplement (https://gsapubs.figshare.com/ndownloader/files/23319197)
Supplement: Supplementary file 1 [file 23319197 › Table-DR5.xlsx]

## Sheet: Feuil1
DR2020099 accompanies Youbi, N., Ernst, R.E., Soderlund, U., Boumehdi, M.A., Ait Lahna, A., Tassinari, C.C.G., El Moume, W., and Bensalah, M.K., 2020, The Central Iapetus magmatic province: An updated review and link with the ca. 580 Ma Gaskiers glaciation,
in Adatte, T., Bond, D.P.G., and Keller, G., eds., Mass Extinctions, Volcanism, and Impacts: New Developments: Geological Society of America Special Paper 544, p. 35–66, https://doi.org/10.1130/2020.2544(02).
Table DR5: Selection of U-Pb geochronological data recording magmatic pulses of the CIMP in the norther portion of the West African craton (i.e., Anti-Atlas, High Atlas and Western Meseta After the compilations of Youbi, 1998; Thomas et al., 2002; Soulaimani et al., 2003; Gasquet et al., 2005; 2008; Walsh et al., 2002; 2012; Hefferan et al., 2014 completed by this work). Radiometric dates are tab…
Region	Unit	Definition	Sample Id	Mineral	System	Method	Type	Age	±2σ	2σ	Reference
				1		2	3	[Ma]
Western Meseta /Bou Regreg Corridor between Sehoul Block and Sidi Bettache Basin	Ouarzazate Group	Tiflet granitoids/ Sidi Bou Jemaa granitoids	BJE	Zrn	U-Pb	LA-ICP-MS	conc	605	± 4	4	Tahiri et al., 2010
Western Meseta /Bou Regreg Corridor between Sehoul Block and Sidi Bettache Basin	Ouarzazate Group	Tiflet granitoids/ Sidi Bou Jemaa granitoids	BJE	Zrn	U-Pb	LA-ICP-MS	207/206	605	± 4	4	Tahiri et al., 2010
Western Meseta /Bou Regreg Corridor between Sehoul Block and Sidi Bettache Basin	Ouarzazate Group	Tiflet granitoids/ Taicha granitoids	TA	Zrn	U-Pb	LA-ICP-MS	conc	606	± 6	6	Tahiri et al., 2010
Western Meseta /Bou Regreg Corridor between Sehoul Block and Sidi Bettache Basin	Ouarzazate Group	Tiflet granitoids/ Taicha granitoids	TA	Zrn	U-Pb	LA-ICP-MS	207/206	609	± 3	3	Tahiri et al., 2010
Western Meseta /Bou Regreg Corridor between Sehoul Block and Sidi Bettache Basin	Ouarzazate Group	Rhyolites of Jbel Hadid section / Greenish-reddish rhyolite	15DL9 taken from a massive rhyolite from the central part of the Jbel Hadid section	Zrn	U-Pb	LA-ICP-MS	206/238	563.8	±	3.6	Letsch et al., (2018a)
Western Meseta /Bou Regreg Corridor between Sehoul Block and Sidi Bettache Basin	Ouarzazate Group	Rhyolites of Jbel Hadid section / Greenish-reddish rhyolite	15DL9 taken from a massive rhyolite from the central part of the Jbel Hadid section	Zrn	U-Pb	LA-ICP-MS	206/238	597.4	± 2.7	2.7	Letsch et al., (2018a)
Western Meseta /Bou Regreg Corridor between Sehoul Block and Sidi Bettache Basin	Ouarzazate Group	Rhyolites of Bou Ibenrhar section / Rhyolite	15DL1 taken from a rhyolite at the base of the Bou Ibenrhar succession	Zrn	U-Pb	LA-ICP-MS	206/238	569.6	± 3.8	3.8	Letsch et al., (2018a)
Western Meseta / Moroccan Central Massif	Ouarzazate Group	Goaïda dark granitoids	GGT44	Zrn	U-Pb	LA-ICP-MS	206/238	599.9	± 9.9	9.9	Ouabid et al., (2017)
Western Meseta / Moroccan Central Massif	Ouarzazate Group	Goaïda pink granite	GGT43	Zrn	U-Pb	LA-ICP-MS	206/238	552.4	± 9.6	9.6	Ouabid et al., (2017)
Western Meseta / Moroccan Central Massif	Ouarzazate Group	Goaïda granite		Zrn	U-Pb	LA-ICP-MS	up.int	598	± 32	32	Pereira et al., (2014)
Western Meseta / Moroccan Central Massif	Ouarzazate Group	Goaïda granite		Zrn	U-Pb	LA-ICP-MS		590	± 3	3	Pereira et al., (2014)
Western Meseta/ Rehamna	Ouarzazate Group	Sidi Bahilil metarhyolite dome	SRYN 220	Zrn	U-Pb	SHRIMP		593.2	± 7.5	7.5	Cocherie, (2001); Baudin et al., (2003)
Western Meseta	Ouarzazate Group	Rhyolite El Jadida/Rhyolitic ignimbrites	EJR12	Zrn	U-Pb	SHRIMP		597.6	± 4.6	4.6	Youbi et al., (2017)
Western Meseta	Ouarzazate Group	Rhyolite El Jadida/Rhyolitic ignimbrites		Zrn	U-Pb	SHRIMP		577.2	± 3.1	3.1	El Haibi et al., (2017)
Western Meseta	Ouarzazate Group	Rhyolite El Jadida/Rhyolitic ignimbrites		Zrn	U-Pb	SHRIMP		580.8	± 1.4	1.4	El Haibi et al., (2017)
Western Meseta	Ouarzazate Group	Rhyolite El Jadida/Rhyolitic and rhyodacitic lava flows		Zrn	U-Pb	SHRIMP		605	± 11	11	El Haibi et al., (2017)
Western Meseta	Ouarzazate Group	Rhyolite El Jadida/Rhyolitic and rhyodacitic lava flows		Zrn	U-Pb	SHRIMP		577.7	± 3.8	3.8	El Haibi et al., (2017)
Western Meseta	Ouarzazate Group	Rhyolite El Jadida/Rhyolite	JD1	Zrn	U-Pb	SHRIMP		584.2	± 4.8	4.8	El Houicha et al., (2018)
Western High Atlas	Ouarzazate Group	Wirgane granodiorite		Zrn	U-Pb	SIMS		598.2	± 5.2	5.2	Eddif (2002)
Western High Atlas	Ouarzazate Group	Wirgane granodiorite/ Tighardine localitie		Zrn	U-Pb	SIMS		567	± 6	6	Fekkak et al., (unpublished data, 2018)
Western High Atlas	Ouarzazate Group	Wirgane granodiorite/Tighardine localitie		Zrn	U-Pb	SIMS		521	± 5	5	Fekkak et al., (unpublished data, 2018)
Western High Atlas	Ouarzazate Group	Al Medinet granite/Al Medinet localitie		Zrn	U-Pb	SIMS		514	± 3	3	Fekkak et al., (unpublished data, 2018)
Western High Atlas	Ouarzazate Group	Lower porphyritic volcanic unit. Porphyritic andesite	E88	Zrn	U-Pb	SF-ICP-MS	conc	596.1	± 3.3	3.3	Boukerrou et al., (2018)
Western High Atlas	Ouarzazate Group	Lower porphyritic volcanic unit. Porphyritic andesite	E88	Zrn	U-Pb	SF-ICP-MS	206/238	588.5	± 5.9	5.9	Boukerrou et al., (2018)
Western High Atlas	Ouarzazate Group	Lower porphyritic volcanic unit. Dacite	E119	Zrn	U-Pb	SF-ICP-MS	conc	603.5	± 3.3	3.3	Boukerrou et al., (2018)
Western High Atlas	Ouarzazate Group	Lower porphyritic volcanic unit. Dacite	E119	Zrn	U-Pb	SF-ICP-MS	206/238	591.5	± 5.3	5.3	Boukerrou et al., (2018)
Western High Atlas	Lemdad syncline Ash (High Atlas)	Lemdad syncline Ash (High Atlas)/ The ash horizon Le-XI-10.8 lies in the upper Antatlasia gutta-pluviae Zone of the Moroccan upper Lower Cambrian Banian Stage	Le-Xi-10.8	Zrn	U-Pb	TIMS	207/206	517	±0.9	0.9	Landing et al., (1998)
Western High Atlas	Lemdad syncline Ash (High Atlas)	Lemdad syncline Ash (High Atlas)/ The ash horizon Le-XI-10.8 lies in the upper Antatlasia gutta-pluviae Zone of the Moroccan upper Lower Cambrian Banian Stage	Le-Xi-10.8	Zrn	U-Pb	TIMS	206/238	515.5	±0.5	0.5	Landing et al., (1998)
Western High Atlas	Lemdad syncline Ash (High Atlas)	Lemdad syncline Ash (High Atlas)/ The ash horizon Le-XI-10.8 lies in the upper Antatlasia gutta-pluviae Zone of the Moroccan upper Lower Cambrian Banian Stage	Le-Xi-10.8	Zrn	U-Pb	TIMS	207/235	515.8	±0.4	0.4	Landing et al., (1998)
Western High Atlas	Lemdad syncline Ash (High Atlas)	Lemdad syncline Ash (High Atlas)/ The ash horizon Le-XI-10.8 lies in the upper Antatlasia gutta-pluviae Zone of the Moroccan upper Lower Cambrian Banian Stage	Le-Xi-10.8	Zrn	U-Pb	TIMS	conc	517	±1.5	1.5	Landing et al., (1998)
Western High Atlas	The Early Ifri-Azegour Formation	The dacite of Azegour (Tizgui)/Unit 1	T and TIZ	Zrn	U-Pb	SIMS	up.int	532.5	± 4.2	4.2	Pouclet et al., (2008)
Western High Atlas	The Early Ifri-Azegour Formation	The dacite of Azegour (Tizgui)/Unit 1	T and TIZ	Zrn	U-Pb	SIMS	up.int	529	± 15	15	Pouclet et al., (2008)
Western High Atlas	The Early Ifri-Azegour Formation	The dacite of Azegour (Tizgui)/Unit 1	T and TIZ	Zrn	U-Pb	SIMS	206/238	532	± 12	12	Pouclet et al., (2008)
Western High Atlas	The Early Ifri-Azegour Formation	The dacite of Azegour (Tizgui)/Unit 1	T and TIZ	Zrn	U-Pb	SIMS	207/206	537	± 9	9	Pouclet et al., (2008)
High Atlas	Ouarzazate Group	Melsten granite		Zrn	U-Pb	SIMS		565	± 20	20	Juery (1976)
High Atlas	Ouarzazate Group	Melsten granite		Zrn	U-Pb	SIMS		563	± 20	20	Juery et al., (1974); Juery et al., (1975)
High Atlas	Ouarzazate Group	Ourika granodiorite	HA71	Zrn	U-Pb	SIMS	up.int	610	± 15	15	Juery et al., (1975); Juery (1976)
High Atlas	Ouarzazate Group	Bou Ourhioul Rhyolites (Tichrt upper rhyodacitic Ignimbrites)		Zrn	U-Pb	SIMS		578	± 15	15	Juery et al., (1974); Juery et al., (1975)
High Atlas	Ouarzazate Group	Bou Ourhioul Rhyolites (Tichrt upper rhyodacitic Ignimbrites)	HA51	Zrn	U-Pb	SIMS	up.int	580	± 20	20	Juery et al., (1974); Juery (1976)
High Atlas	Ouarzazate Group	Ourika Pink granite	HA104	Zrn	U-Pb	SIMS	up.int	580	± 12	12	Juery et al., (1975); Juery (1976)
High Atlas	Ouzellagh Promontory/Douar Eç-çour Dyke swarm	Dolerite	IG2a	Zrn and Ttn	U-Pb	SIMS		555.7	± 6	6	El Moume et al., (2017)
High Atlas	Ouzellagh Promontory/Douar Eç-çour Dyke swarm	Dolerite	IG2a	Zrn	U-Pb	SIMS		556.4	± 7.3	7.3	El Moume et al., (2017)
High Atlas	Ouzellagh Promontory/Douar Eç-çour Dyke swarm	Dolerite	IG2a	Ttn	U-Pb	SIMS		554	± 10	10	El Moume et al., (2017)
High Atlas	Ouzellagh Promontory/Assarag Suite	Tourcht Diorite	GM58	Zrn	U-Pb	SHRIMP	206/238	579	± 7	7	Thomas et al., (2002)
High Atlas	Ouzellagh Promontory/Assarag Suite	Amlouggui Tonalite	RJM1	Zrn	U-Pb	SHRIMP	207/206	586	± 6	6	Thomas et al., (2002)
Eastern High Atlas	Tamlalt-Menhouhou	Bou Salem metatuffite	JM05 15	Zrn	U-Pb	SIMS	206/238	569	± 8	8	Pelleter et al., (2007)
Eastern High Atlas	Tamlalt-Menhouhou	Menhouhou Upper Rhyolite	JM04-12	Zrn	U-Pb	SIMS	206/238	544	± 7	7	Pelleter et al., (2007)
Eastern High Atlas	Tamlalt-Menhouhou	Menhouhou Albitized banded rhyolitic metatuffite	JM04 14	Zrn	U-Pb	SIMS	206/238	562	± 16	16	Pelleter et al., (2007)
Eastern Anti-Atlas	Ougnat inlier /Ouarzazate Supergroup	Bou Madine Rhyolitic dome	BM7	Zrn	U-Pb	SIMS	206/238	552	± 5	5	Gasquet et al., (2005)
Eastern Anti-Atlas	Jebel Saghro Massif /Ouarzazate Supergroup/Mançour Goup/Oulggou Formation	Andesite lava flows of the bottom of the volcanic pile of the Ouarzazate Supergroup	B 816	Zrn	U-Pb	SIMS	up.int	570	± 7	7	O'Connor et al (2010)
Eastern Anti-Atlas	Jebel Saghro Massif /Ouarzazate Supergroup/Mançour Goup/Amtattouch Yadawdane Formation	Rhyolitic ignimbrites of the lower part of the volcanic pile of the Ouarzazate Supergroup	B 901	Zrn	U-Pb	SIMS	up.int	566	± 8	8	O'Connor et al (2010)
Eastern Anti-Atlas	Jebel Saghro Massif /Ouarzazate Supergroup/Mançour Goup/Ouzarzam Formation	Rhyolitic ignimbrites of the bottom of the volcanic pile of the Ouarzazate Supergroup	B 637	Zrn	U-Pb	SIMS	up.int	564	± 6	6	O'Connor et al (2010)
Eastern Anti-Atlas	Jebel Saghro Massif /Ouarzazate Supergroup/Mançour Goup/Ouzarzam Formation	Rhyolitic ignimbrites of the upper part of the volcanic pile of the Ouarzazate Supergroup	B 239	Zrn	U-Pb	SIMS	up.int	548	± 3	3	O'Connor et al (2010)
Eastern Anti-Atlas	Jebel Saghro Massif /1/50 000 Imtir Sheet	Igoudrane Pluton/ Tonalite	DP 096	Zrn	U-Pb	SIMS		618	±43	43	Schiavo et al., (2007)
Eastern Anti-Atlas	Jebel Saghro Massif /1/50 000 Imtir Sheet	Oussilkane Pluton/ Monzogranite	DP 964	Zrn	U-Pb	SIMS		596	±20	20	Schiavo et al., (2007)
Eastern Anti-Atlas	Jebel Saghro Massif /1/50 000 Imtir Sheet	Oussilkane Pluton/ Monzogranite	DP 964	Zrn	U-Pb	SIMS		571	±22	15	Schiavo et al., (2007)
Eastern Anti-Atlas	Jebel Saghro Massif /1/50 000 Imtir Sheet	Oussilkane Pluton/ Monzogranite	DP 964	Zrn	U-Pb	SIMS		541	±15	15	Schiavo et al., (2007)
Eastern Anti-Atlas	Jebel Saghro Massif /1/50 000 Imtir Sheet	Arharrhitz Pluton/ Monzogranite	MM 305	Zrn	U-Pb	SIMS		618	±26	26	Schiavo et al., (2007)
Eastern Anti-Atlas	Jebel Saghro Massif /1/50 000 Imtir Sheet	Arharrhitz Pluton/ Monzogranite	MM 305	Zrn	U-Pb	SIMS		615	±20	20	Schiavo et al., (2007)
Eastern Anti-Atlas	Jebel Saghro Massif /1/50 000 Imtir Sheet	Arharrhitz Pluton/ Monzogranite	MM 305	Zrn	U-Pb	SIMS		571	±22	22	Schiavo et al., (2007)
Eastern Anti-Atlas	Jebel Saghro Massif /1/50 000 Imtir Sheet	Jbel n' Habab-Imiter Dacite	DP 113	Zrn	U-Pb	SIMS		524	±16	16	Schiavo et al., (2007)
Eastern Anti-Atlas	Jebel Saghro Massif /1/50 000 Boumalne Sheet	Taouzzakt Pluton/ Quatrz diorite		Zrn	U-Pb	SIMS		572	±5	5	Schiavo et al., (2007)
Eastern Anti-Atlas	Jebel Saghro Massif /1/50 000 Boumalne Sheet	Assif n' Tagoudalt rhyolite	DP 039	Zrn	U-Pb	SIMS		521	±16	16	Massironi et al (2007)
Eastern Anti-Atlas	Jebel Saghro Massif /Ouarzazate Supergroup	Igoudrane Pluton/Granodiorite		Zrn	U-Pb	SIMS		565	±5	5	De Wall et al. (2001)
Eastern Anti-Atlas	Jebel Saghro Massif /Ouarzazate Supergroup	Taouzzakt Pluton/Quatrz diorite		Zrn	U-Pb	SIMS		555	±7	7	De Wall et al. (2001); Errami et al. (2009)
Eastern Anti-Atlas	Jebel Saghro Massif /Ouarzazate Supergroup	Taouzzakt Pluton/Granodiorite		Zrn	U-Pb	SIMS		573	±4	4	Cheilletz et al. (2002)
Eastern Anti-Atlas	Jebel Saghro Massif /Ouarzazate Supergroup	Taouzzakt Pluton/Granodiorite		Zrn	U-Pb	SIMS		572	±5	5	Levresse (2001); Levresse etal., (2004)
Eastern Anti-Atlas	Jebel Saghro Massif /Ouarzazate Supergroup	Bou Teglimt Pluton /Granite		Zrn	U-Pb	SIMS		576	±4	4	De Wall et al. (2001); Errami et al. (2009)
Eastern Anti-Atlas	Jebel Saghro Massif /Ouarzazate Supergroup	Isk'n Allah Pluton/ Granite		Zrn	U-Pb	SIMS		555	±4	4	De Wall et al. (2001); Errami et al. (2009)
Eastern Anti-Atlas	Jebel Saghro Massif /Ouarzazate Supergroup	Kada Aïssa Pluton/ Monzodiorite		Zrn	U-Pb	SIMS		561	±2	2	Chebbaa (1996)
Eastern Anti-Atlas	Jebel Saghro Massif /Ouarzazate Supergroup	Takhatert Rhyolitic dome		Zrn	U-Pb	SIMS		550	±3	3	Cheilletz et al. (2002)
Eastern Anti-Atlas	Jebel Saghro Massif /Ouarzazate Supergroup	Tachkakacht Rhyolitic dyke		Zrn	U-Pb	SIMS		543	±9	9	Gasquet et al. (2005)
Eastern Anti-Atlas	Jebel Saghro Massif /Ouarzazate Supergroup	Tachkakacht Rhyolitic dyke		Zrn	U-Pb	SIMS		545	±4	4	Levresse (2001); Levresse et al., (2004)
Eastern Anti-Atlas	Jebel Saghro Massif /Ouarzazate Supergroup	Issougrid Rhyolite		Zrn	U-Pb	SIMS		561	±3	3	Chebbaa (1996)
Eastern Anti-Atlas	Jebel Saghro Massif /Ouarzazate Supergroup	Bou Fliou Pluton/Granite		Zrn	U-Pb	SHRIMP	206/238	582	± 6	6	Baidada et al., (2017)
Eastern Anti-Atlas	Jebel Saghro Massif /Ouarzazate Supergroup	Teglimt Pluton/Granodiorite		Zrn	U-Pb	SHRIMP	206/238	567	± 6	6	Baidada et al., (2017)
Eastern Anti-Atlas	Jebel Saghro Massif /Ouarzazate Supergroup	Ikniwn granodiorite intrusion		Zrn	U-Pb	LA-ICP-MS		563.5	± 6.3	6.3	Tuduri et al., (2018)
Eastern Anti-Atlas	Jebel Saghro Massif /Ouarzazate Supergroup	Rhyolite flow at Jebel Amgroud /Upper Ouarzazate Supergroup	G1115	Zrn	U-Pb	SHRIMP		556	±4	4	Walsh et al., (2012)
Eastern Anti-Atlas	Jebel Saghro Massif /Ouarzazate Supergroup	Rhyolite flow at Jebel Amgroud /Upper Ouarzazate Supergroup	G1115	Zrn	U-Pb	SHRIMP		555	±5	5	Walsh et al., (2012)
Eastern Anti-Atlas	Jebel Saghro Massif /Ouarzazate Supergroup	Rhyolite flow in the Oued Alqantrat / Upper Ouarzazate Supergroup	B101	Zrn	U-Pb	SHRIMP		558	±4	4	Walsh et al., (2012)
Eastern Anti-Atlas	Jebel Saghro Massif /Ouarzazate Supergroup	Rhyolite flow / Lower Ouarzazate Supergroup	B3026	Zrn	U-Pb	SHRIMP		571	±5	5	Walsh et al., (2012)
Eastern Anti-Atlas	Jebel Saghro Massif /Ouarzazate Supergroup	Rhyolite flow / Lower Ouarzazate Supergroup	B3026	Zrn	U-Pb	SHRIMP		571	±6	6	Walsh et al., (2012)
Eastern Anti-Atlas	Jebel Saghro Massif /Ouarzazate Supergroup	Rhyodacitic tuff/ Lower Ouarzazate Supergroup	T4218	Zrn	U-Pb	SHRIMP		571	±5	5	Walsh et al., (2012)
Eastern Anti-Atlas	Jebel Saghro Massif /Ouarzazate Supergroup	Rhyolitic tuff of the Oued Dar’a caldera / Lower Ouarzazate Supergroup	T4216	Zrn	U-Pb	SHRIMP		574	±7	7	Walsh et al., (2012)
Eastern Anti-Atlas	Jebel Saghro Massif /Ouarzazate Supergroup	Rhyolitic tuff of the Oued Dar’a caldera / Lower Ouarzazate Supergroup	T4216	Zrn	U-Pb	SHRIMP		573	±5	5	Walsh et al., (2012)
Eastern Anti-Atlas	Jebel Saghro Massif /Ouarzazate Supergroup	Rhyolitic dike of Timijt swarm/ NP3 intrusive rocks	B1363	Zrn	U-Pb	SHRIMP		562	±5	5	Walsh et al., (2012)
Eastern Anti-Atlas	Jebel Saghro Massif /Ouarzazate Supergroup	Pink Isk-n-Alla granite/ NP3 intrusive rocks	K1123	Zrn	U-Pb	SHRIMP		559	±5	5	Walsh et al., (2012)
Eastern Anti-Atlas	Jebel Saghro Massif /Ouarzazate Supergroup	Pink Isk-n-Alla granite/ NP3 intrusive rocks	K1123	Zrn	U-Pb	SHRIMP		558	±5	5	Walsh et al., (2012)
Eastern Anti-Atlas	Jebel Saghro Massif /Ouarzazate Supergroup	Gabbro of Tagmout/ NP3 intrusive rocks	K3052	Zrn	U-Pb	SHRIMP		556	±5	5	Walsh et al., (2012)
Eastern Anti-Atlas	Jebel Saghro Massif /Ouarzazate Supergroup	Gabbro of Tagmout/ NP3 intrusive rocks	K3052	Zrn	U-Pb	SHRIMP		557	±5	5	Walsh et al., (2012)
Eastern Anti-Atlas	Jebel Saghro Massif /Ouarzazate Supergroup	Rhyolitic dike of the Bouskour–Sidi Flah swarm/ NP3 intrusive rocks	B1158	Zrn	U-Pb	SHRIMP		563	±7	7	Walsh et al., (2012)
Eastern Anti-Atlas	Jebel Saghro Massif /Ouarzazate Supergroup	Rhyolitic dike of the Bouskour–Sidi Flah swarm/ NP3 intrusive rocks	B1158	Zrn	U-Pb	SHRIMP		564	±7	7	Walsh et al., (2012)
Eastern Anti-Atlas	Jebel Saghro Massif /Ouarzazate Supergroup	Bouskour granite / NP3 intrusive rocks	B1159	Zrn	U-Pb	SHRIMP		570	±5	5	Walsh et al., (2012)
Eastern Anti-Atlas	Jebel Saghro Massif /Ouarzazate Supergroup	Granodiorite of Wizergane/ NP3 intrusive rocks	K36	Zrn	U-Pb	SHRIMP		576	±5	5	Walsh et al., (2012)
Eastern Anti-Atlas	Jebel Saghro Massif /Ouarzazate Supergroup	Granodiorite of Wizergane/ NP3 intrusive rocks	K36	Zrn	U-Pb	SHRIMP		577	±6	6	Walsh et al., (2012)
Eastern Anti-Atlas	Jebel Saghro Massif /Ouarzazate Supergroup	Pink microgranite of Assif Tagmout / NP3 intrusive rocks	B1178	Zrn	U-Pb	SHRIMP		574	±9	9	Walsh et al., (2012)
Eastern Anti-Atlas	Jebel Saghro Massif /Ouarzazate Supergroup	Pink microgranite of Assif Tagmout / NP3 intrusive rocks	B1178	Zrn	U-Pb	SHRIMP		577	±8	8	Walsh et al., (2012)
Eastern Anti-Atlas	Jebel Saghro Massif /Ouarzazate Supergroup	Zouzmitane microgranite/ NP3 intrusive rocks	B1073	Zrn	U-Pb	SHRIMP		588	±7	7	Walsh et al., (2012)
Eastern Anti-Atlas	Jebel Saghro Massif /Ouarzazate Supergroup	Zouzmitane microgranite/ NP3 intrusive rocks	B1073	Zrn	U-Pb	SHRIMP		588	±6	6	Walsh et al., (2012)
Eastern Anti-Atlas	Jebel Saghro Massif /Ouarzazate Supergroup	N 45° trending dolerite dyke/ Imiter Dyke	AN737	Zrn	U-Pb	LA-ICPMS		578.8	±3.8	3.8	El Moume et al., (2017)
Central Anti-Atlas	Bou Azzer El Graara inlier	Bleida Pluton /Granodiorite		Zrn	U-Pb	SIMS		615	± 12	12	Durcot (1978); Durcot (1979)
Central Anti-Atlas	Bou Azzer El Graara inlier	Bleida Pluton /Granodiorite		Zrn	U-Pb	TIMS		578.5	± 1.2	1.2	Inglis et al.,(2004)
Central Anti-Atlas	Bou Azzer El Graara inlier	Bleida Pluton /Granodiorite		Zrn	U-Pb	TIMS		579.4	± 1.2	1.2	Inglis et al., (2004)
Central Anti-Atlas	Bou Azzer El Graara inlier	Bleida Pluton /Granodiorite		Zrn	U-Pb	SIMS		595.2	± 3.4	3.4	Maloof, (2004)
Central Anti-Atlas	Bou Azzer El Graara inlier	Bleida Pluton /Granodiorite		Zrn	U-Pb	SIMS		596.6	± 7.2	7.2	Maloof, (2004)
Central Anti-Atlas	Bou Azzer El Graara inlier	Ousdrat Pluton/Diorite		Zrn	U-Pb	SIMS		602	± 6	6	Mrini (1993)
Central Anti-Atlas	Bou Azzer El Graara inlier	Jbel Boho Syenite Intrusion		Zrn	U-Pb	SIMS		534	± 10	10	Ducrot et Lancelot (1977)
Central Anti-Atlas	Bou Azzer El Graara inlier	Jbel Boho Syenite Intrusion		Zrn	U-Pb	SIMS		529	± 3	3	Gasquet et al., (2005)
Central Anti-Atlas	Bou Azzer El Graara inlier	Aghbar Trachyte		Zrn	U-Pb	SIMS		531	± 5	5	Gasquet et al. (2005)
Central Anti-Atlas	Bou Azzer El Graara inlier	The base of the Adoudou Formation is characterized by a pyroclastic breccia with basaltic clasts. Sample BOPC343, one of these clasts, is a porphyric basalt with plagioclase feldspar phenocrysts	BOPC343	Zrn	U-Pb	SHRIMP		541	±6	6	Blein et al (2014b)
Central Anti-Atlas	Bou Azzer El Graara inlier	Bou Azzer Ignimbrite	BOYN106b	Zrn	U-Pb	SIMS		534	±3	3	Blein et al (2014b)
Central Anti-Atlas	Bou Azzer El Graara inlier	Rhyolitic welded tuff overlying the Tiddiline Group	ALDG20	Zrn	U-Pb	SHRIMP		567	±5	5	Blein et al (2014b)
Central Anti-Atlas	Bou Azzer El Graara inlier	Rhyolitic welded tuff at north Bou Azzer	BODG6	Zrn	U-Pb	SIMS		566	±4	4	Blein et al (2014b)
Central Anti-Atlas	Bou Azzer El Graara inlier	Bleida Pluton /Granodiorite	AGDG1	Zrn	U-Pb	SIMS		586	±15	15	Blein et al (2014b)
Central Anti-Atlas	Siroua (Sirwa) Window	Syn-Ouarzazate Group granites/Boutazart granite	RTM 154	Zrn	U-Pb	SHRIMP	up.int	559	±6	6	Thomas et al., (2002)
Central Anti-Atlas	Siroua (Sirwa) Window	Syn-Ouarzazate Group granites/Tikitar granite		Zrn	U-Pb	SHRIMP		559	±6	6	Thomas et al. (2000)
Central Anti-Atlas	Siroua (Sirwa) Window	Ouarzazate Group volcanics/Tikhfist Formation rhyolite (Tidili rhyolite)	GK 313	Zrn	U-Pb	SHRIMP		571	±8	8	Thomas et al. (2000)
Central Anti-Atlas	Siroua (Sirwa) Window	Syn-Ouarzazate Group granites/ Tazoult granite (Tazoult quartz porphyry)	RTM 154	Zrn	U-Pb	SHRIMP		559	±6	6	Thomas et al., (2002)
Central Anti-Atlas	Siroua (Sirwa) Window	Syn-Ouarzazate Group granites/Imourkhsane granite	GM 51	Zrn	U-Pb	SHRIMP	up.int	562	±5	5	Thomas et al., (2002)
Central Anti-Atlas	Siroua (Sirwa) Window	Post Sarhro (Saghro) Group intrusive rocks/Assarag Suite/Askaoun granodiorite	RTM 87	Zrn	U-Pb	SHRIMP	up.int	575	±8	8	Thomas et al., (2002)
Central Anti-Atlas	Siroua (Sirwa) Window	Post Sarhro (Saghro) Group intrusive rocks/Assarag Suite/Amlouggui tonalite	RJM 1	Zrn	U-Pb	SHRIMP		586	±8	8	Thomas et al., (2002)
Central Anti-Atlas	Siroua (Sirwa) Window	Post Sarhro (Saghro) Group intrusive rocks/Tourcht diorite	GM 58	Zrn	U-Pb	SHRIMP		579	±7	8	Thomas et al., (2002)
Central Anti-Atlas	Siroua (Sirwa) Window	Rhyolites associated with the Bou Salda Formation/Tamriwine rhyolite	GM 191	Zrn	U-Pb	SHRIMP		605	±9	9	Thomas et al., (2002)
Central Anti-Atlas	Siroua (Sirwa) Window	Rhyolites associated with the Bou Salda Formation/Tadmant rhyolite	GM 73	Zrn	U-Pb	SHRIMP		606	±6	6	Thomas et al., (2002)
Central Anti-Atlas	Siroua (Sirwa) Window	Middle Ignimbrites of Tiouine		Zrn	U-Pb	SIMS		563	±10	10	Mifdal et Peucat (1985)
Central Anti-Atlas	Siroua (Sirwa) Window	Upper Ignimbrite of Tiouine		Zrn	U-Pb	SIMS		586	±20	20	Mifdal et Peucat (1985)
Central Anti-Atlas	Siroua (Sirwa) Window	Upper Ignimbrite of Tiouine		Zrn	U-Pb	SIMS		574	±5	5	Mifdal et Peucat (1985)
Central Anti-Atlas	Siroua (Sirwa) Window	Lower Rhyolites of Jbel Bachkoun		Zrn	U-Pb	SIMS		580	±12	12	Mifdal et Peucat (1985)
Central Anti-Atlas	Siroua (Sirwa) Window	Post Sarhro (Saghro) Group intrusive rocks/Imourkhssen granite	PH10	Zrn	U-Pb	SIMS		560.7	±3.1	3.1	Toummite et al., (2012)
Central Anti-Atlas	Siroua (Sirwa) Window	Post Sarhro (Saghro) Group intrusive rocks/Assarag Suite/Askaoun granodiorite	MS7	Zrn	U-Pb	SIMS		557.7	±3.3	3.3	Toummite et al., (2012)
Central Anti-Atlas	Siroua (Sirwa) Window	Post Sarhro (Saghro) Group intrusive rocks/Assarag Suite/Askaoun granodiorite	MS7	Zrn	U-Pb	SIMS	conc	587.9	±5.6	5.6	Toummite et al., (2012)
Central Anti-Atlas	Siroua (Sirwa) Window	Post Sarhro (Saghro) Group intrusive rocks/Assarag Suite/Askaoun granodiorite	DZB	Zrn	U-Pb	SIMS	conc	557.8	±2.2	2.2	Toummite et al., (2012)
Central Anti-Atlas	Siroua (Sirwa) Window	Ouarzazate Group / Rhyolitic dikes and plugs of the Assarag suite in the Zgounder area/ Rhyolite dome	ZG04- 05	Zrn	U-Pb	SIMS	206/238	617	± 6	6	Pelleter et al., (2016)
Central Anti-Atlas	Siroua (Sirwa) Window	Ouarzazate Group / Rhyolitic dikes and plugs of the Assarag suite in the Zgounder area/ Rhyolite dome	ZG04- 05	Zrn	U-Pb	SIMS	207/206	610	± 7	7	Pelleter et al., (2016)
Central Anti-Atlas	Siroua (Sirwa) Window	Ouarzazate Group / Rhyolitic dikes and plugs of the Assarag suite in the Zgounder area/ Rhyolite dome	ZG04- 05	Zrn	U-Pb	SIMS	206/238	610	± 7	7	Pelleter et al., (2016)
Central Anti-Atlas	Siroua (Sirwa) Window	Ouarzazate Group / Rhyolitic dikes and plugs of the Assarag suite in the Zgounder area/ E-W-trending rhyolite dyke	ZG05- 07	Zrn	U-Pb	SIMS	207/206	576	± 10.5	10.5	Pelleter et al., (2016)
Central Anti-Atlas	Siroua (Sirwa) Window	Ouarzazate Group / Rhyolitic dikes and plugs of the Assarag suite in the Zgounder area/ Albitized rhyolite plug	ZG04- 22	Zrn	U-Pb	SIMS	up.int	576	± 27	27	Pelleter et al., (2016)
Central Anti-Atlas	Siroua (Sirwa) Window	Ouarzazate Group / Rhyolitic dikes and plugs of the Assarag suite in the Zgounder area/ Albitized rhyolite plug	ZG04- 22	Zrn	U-Pb	SIMS	207/206	578	± 4	4	Pelleter et al., (2016)
Central Anti-Atlas	Siroua (Sirwa) Window	Ouarzazate Group / Rhyolitic dikes and plugs of the Assarag suite in the Zgounder area/ Albitized rhyolite plug	ZG04- 22	Zrn	U-Pb	SIMS	up.int	560	± 21	21	Pelleter et al., (2016)
Central Anti-Atlas	Siroua (Sirwa) Window	Ouarzazate Group / Rhyolitic dikes and plugs of the Assarag suite in the Zgounder area/ Albitized rhyolite plug	ZG04- 22	Zrn	U-Pb	SIMS	207/206	564	± 15	15	Pelleter et al., (2016)
Central Anti-Atlas	Zenaga inlier	Syn-Ouarzazate Group granites/Tilsakht granite (Sidi El Hosseine)	GM 220	Zrn	U-Pb	SHRIMP	up.int	579	±7	7	Thomas et al., (2002)
Central Anti-Atlas	Zenaga inlier	Ouarzazate Group volcanics/Tawzzart Formation rhyolite/Aguins Member	CM 7	Zrn	U-Pb	SHRIMP		577	±6	8	Thomas et al. (2000)
Central Anti-Atlas	Zenaga inlier	Ouarzazate Group volcanics/Upper rhyolitic ignimbrite	14DL15	Zrn	U-Pb	LA-ICP-MS		574.9	±3	3	Letsch et al., (2018b)
Central Anti-Atlas	Zenaga inlier	Ouarzazate Group volcanics/Lower rhyolitic ignimbrite	14DL21	Zrn	U-Pb	LA-ICP-MS/CA-ID-TIMS		593.12	± 0.14	3	Letsch et al., (2018b)
Central Anti-Atlas	Agadir Melloul inlier/Tabadrist 1/50 000 Sheet	Ouarzazate Group /Rhyolitic crystal tuf	TBTB 647	Zrn	U-Pb	SHRIMP		572	±5	5	Blein et al., (2014a)
Central Anti-Atlas	Agadir Melloul inlier/Agadir Melloul 1/50 000 Sheet	Ouarzazate Group /Rhyolite	AMTB 059	Zrn	U-Pb	SHRIMP		570	±6	6	Blein et al., (2014a)
Central Anti-Atlas	Agadir Melloul inlier/ Agadir Melloul 1/50 000 Sheet	Syn-Ouarzazate Group Dolerite/ /Dolerite	AMAS 014	Zrn	U-Pb	SHRIMP		570	±7	7	Blein et al., (2014a)
Central Anti-Atlas	Agadir Melloul inlier/ Tabadrist 1/50 000 Sheet	Ouarzazate Group /Rhyolitic Tuf	TBTB 404	Zrn	U-Pb	SHRIMP		568	±6	6	Blein et al., (2014a)
Central Anti-Atlas	Agadir Melloul inlier/ Agadir Melloul 1/50 000 Sheet	Ouarzazate Group /Andesitic flow	AMTB 061	Zrn	U-Pb	SHRIMP		566	±6	6	Blein et al., (2014a)
Central Anti-Atlas	Agadir Melloul inlier/Agadir Melloul 1/50 000 Sheet	Ouarzazate Group /Ignimbrite	AMOB 211	Zrn	U-Pb	SHRIMP		567	±5	5	Blein et al., (2014a)
Central Anti-Atlas	Agadir Melloul inlier/Agadir Melloul 1/50 000 Sheet	Ouarzazate Group /Ignimbrite	AMOB 065	Zrn	U-Pb	SHRIMP		556	±5	5	Blein et al., (2014a)
Central Anti-Atlas	Agadir Melloul inlier/Tabadrist 1/50 000 Sheet	Ouarzazate Group /Dacitic crystal tuf	TBOB 003	Zrn	U-Pb	SHRIMP		561	±6	6	Blein et al., (2014a)
Central Anti-Atlas	Agadir Melloul inlier/Tabadrist 1/50 000 Sheet	Ouarzazate Group /Ignimbrite	TBTB 329	Zrn	U-Pb	SHRIMP		565	±6	6	Blein et al., (2014a)
Central Anti-Atlas	Agadir Melloul inlier/Tabadrist 1/50 000 Sheet	Ouarzazate Group /Rhyolite	TBOB 047	Zrn	U-Pb	SHRIMP		564	±6	6	Blein et al., (2014a)
Central Anti-Atlas	Agadir Melloul inlier/Tabadrist 1/50 000 Sheet	Ouarzazate Group /Ignimbrite	TBOB 063	Zrn	U-Pb	SHRIMP		565	±5	5	Blein et al., (2014a)
Central Anti-Atlas	Tagragra of Tata inlier	Ouarzazate Group/Ignimbrite de Tifarcht	Sample 40905	Zrn	U-Pb	SHRIMP		565	±7	7	Walsh et al. (2002)
Western Anti-Atlas	Ighrem inlier	Tuff within the Lie de Vin Formation, near Tiout/ The ash is reported to lie 730 m above the base of the 940 m thick Lie de vin Formation at the Tiout locality in the western Anti-Atlas	Mounts Z833 and Z902	Zrn	U-Pb	SHRIMP		521	±7	7	Compston et al. (1992)
Western Anti-Atlas	Ighrem inlier	Oued Sdas Ash (Tifnout Member/Upper Adoudou Formation)	M223	Zrn	U-Pb	TIMS	conc	526.44	±0.14	0.14	Maloof, (2004)
Western Anti-Atlas	Ighrem inlier	Oued Sdas Ash (Tifnout Member/Upper Adoudou Formation)	M223	Zrn	U-Pb	TIMS	conc	525.38	±0.46	0.46	Maloof et al. (2004)
Western Anti-Atlas	Ighrem inlier	Oued Sdas Ash (Tifnout Member/Upper Adoudou Formation)	M223	Zrn	U-Pb	TIMS	207/206	527.28	±0.53	0.53	Maloof et al. (2004)
Western Anti-Atlas	Ighrem inlier	Oued Sdas Ash (Tifnout Member/Upper Adoudou Formation)	M223	Zrn	U-Pb	TIMS	207/206	527.28	±4.57	4.57	Maloof et al. (2004)
Western Anti-Atlas	Ighrem inlier	Oued Sdas Ash (Tifnout Member/Upper Adoudou Formation)	M223	Zrn	U-Pb	TIMS	207/235	525.60	±0.18	0.18	Maloof et al. (2004)
Western Anti-Atlas	Ighrem inlier	Oued Sdas Ash (Tifnout Member/Upper Adoudou Formation)	M223	Zrn	U-Pb	TIMS	207/235	525.60	±0.44	0.44	Maloof et al. (2004)
Western Anti-Atlas	Ighrem inlier	Oued Sdas Ash (Tifnout Member/Upper Adoudou Formation)	M223	Zrn	U-Pb	TIMS	207/235	525.60	±1.16	1.16	Maloof et al. (2004)
Western Anti-Atlas	Ighrem inlier	Oued Sdas Ash (Tifnout Member/Upper Adoudou Formation)	M223	Zrn	U-Pb	TIMS	206/238	525.23	±0.12	0.12	Maloof et al. (2004)
Western Anti-Atlas	Ighrem inlier	Oued Sdas Ash (Tifnout Member/Upper Adoudou Formation)	M223	Zrn	U-Pb	TIMS	206/238	525.23	±0.38	0.38	Maloof et al. (2004)
Western Anti-Atlas	Ighrem inlier	Oued Sdas Ash (Tifnout Member/Upper Adoudou Formation)	M223	Zrn	U-Pb	TIMS	206/238	525.23	±0.94	0.94	Maloof et al. (2004)
Western Anti-Atlas	Ighrem inlier	Oued Sdas Ash (Tifnout Member/Upper Adoudou Formation)	M223	Zrn	U-Pb	TIMS	206/238	525.343	±0.088	0.088	Maloof et al., (2010)
Western Anti-Atlas	Ighrem inlier	Oued Sdas Ash (Tifnout Member/Upper Adoudou Formation)	M223	Zrn	U-Pb	TIMS	207/235	525.86	±0.17	0.17	Maloof et al., (2010)
Western Anti-Atlas	Ighrem inlier	Oued Sdas Ash (Tifnout Member/Upper Adoudou Formation)	M223	Zrn	U-Pb	TIMS	207/206	528.09	±0.71	0.71	Maloof et al., (2010)
Western Anti-Atlas	Ighrem inlier	Oued Sdas Ash (Tifnout Member/Upper Adoudou Formation)	M231	Zrn	U-Pb	TIMS	206/238	524.837	±0.092	0.092	Maloof et al., (2010)
Western Anti-Atlas	Ighrem inlier	Oued Sdas Ash (Tifnout Member/Upper Adoudou Formation)	M231	Zrn	U-Pb	TIMS	207/235	525.07	±0.13	0.13	Maloof et al., (2010)
Western Anti-Atlas	Ighrem inlier	Oued Sdas Ash (Tifnout Member/Upper Adoudou Formation)	M231	Zrn	U-Pb	TIMS	207/206	525.99	±0.58	0.58	Maloof et al., (2010)
Western Anti-Atlas	Ighrem inlier	Oued Sdas Ash (Lie de Vin Formation)	M234	Zrn	U-Pb	TIMS	206/238	523.17	±0.16	0.16	Maloof et al., (2010)
Western Anti-Atlas	Ighrem inlier	Oued Sdas Ash (Lie de Vin Formation)	M234	Zrn	U-Pb	TIMS	207/235	523.62	±0.47	0.47	Maloof et al., (2010)
Western Anti-Atlas	Ighrem inlier	Oued Sdas Ash (Lie de Vin Formation)	M234	Zrn	U-Pb	TIMS	207/206	525.6	±2.3	2.3	Maloof et al., (2010)
Western Anti-Atlas	Ighrem inlier	Oued Sdas Ash (Lie de Vin Formation)	M236	Zrn	U-Pb	TIMS	206/238	520.93	±0.14	0.14	Maloof et al., (2010)
Western Anti-Atlas	Ighrem inlier	Oued Sdas Ash (Lie de Vin Formation)	M236	Zrn	U-Pb	TIMS	207/235	521.57	±0.37	0.37	Maloof et al., (2010)
Western Anti-Atlas	Ighrem inlier	Oued Sdas Ash (Lie de Vin Formation)	M236	Zrn	U-Pb	TIMS	207/206	524.6	±1.8	1.8	Maloof et al., (2010)
Western Anti-Atlas	Ighrem inlier	Igherm Tuff	M7.4	Zrn	U-Pb	TIMS		564.6	±3.2	3.2	Maloof, (2004)
Western Anti-Atlas	Ighrem inlier	Ouarzazate Group/Minount Rhyodacite/The second youngest lava flow associated with a volcanic center to the northwest of Timjich in the uppermost Ouarzazate Group	M1149	Zrn	U-Pb	TIMS	conc	561	±1	1	Maloof, (2004)
Western Anti-Atlas	Ighrem inlier	Ouarzazate Group/Minount Rhyodacite/The second youngest lava flow associated with a volcanic center to the northwest of Timjich in the uppermost Ouarzazate Group	M1149	Zrn	U-Pb	TIMS	207/206	563.84	±0.66	0.66	Maloof et al., (2005)
Western Anti-Atlas	Ighrem inlier	Ouarzazate Group/Minount Rhyodacite/The second youngest lava flow associated with a volcanic center to the northwest of Timjich in the uppermost Ouarzazate Group	M1149	Zrn	U-Pb	TIMS	207/206	563.84	±4.61	4.61	Maloof et al., (2005)
Western Anti-Atlas	Ighrem inlier	Ouarzazate Group/Minount Rhyodacite/The second youngest lava flow associated with a volcanic center to the northwest of Timjich in the uppermost Ouarzazate Group	M1149	Zrn	U-Pb	TIMS	207/235	563.02	±0.23	0.23	Maloof et al., (2005)
Western Anti-Atlas	Ighrem inlier	Ouarzazate Group/Minount Rhyodacite/The second youngest lava flow associated with a volcanic center to the northwest of Timjich in the uppermost Ouarzazate Group	M1149	Zrn	U-Pb	TIMS	207/235	563.02	±0.51	0.51	Maloof et al., (2005)
Western Anti-Atlas	Ighrem inlier	Ouarzazate Group/Minount Rhyodacite/The second youngest lava flow associated with a volcanic center to the northwest of Timjich in the uppermost Ouarzazate Group	M1149	Zrn	U-Pb	TIMS	207/235	563.02	±1.27	1.27	Maloof et al., (2005)
Western Anti-Atlas	Ighrem inlier	Ouarzazate Group/Minount Rhyodacite/The second youngest lava flow associated with a volcanic center to the northwest of Timjich in the uppermost Ouarzazate Group	M1149	Zrn	U-Pb	TIMS	206/238	562.81	±0.15	0.15	Maloof et al., (2005)
Western Anti-Atlas	Ighrem inlier	Ouarzazate Group/Minount Rhyodacite/The second youngest lava flow associated with a volcanic center to the northwest of Timjich in the uppermost Ouarzazate Group	M1149	Zrn	U-Pb	TIMS	206/238	562.81	±0.43	0.43	Maloof et al., (2005)
Western Anti-Atlas	Ighrem inlier	Ouarzazate Group/Minount Rhyodacite/The second youngest lava flow associated with a volcanic center to the northwest of Timjich in the uppermost Ouarzazate Group	M1149	Zrn	U-Pb	TIMS	206/238	562.81	±1.03	1.03	Maloof et al., (2005)
Western Anti-Atlas	Ighrem inlier	Ouarzazate Group/Minount Rhyodacite/The second youngest lava flow associated with a volcanic center to the northwest of Timjich in the uppermost Ouarzazate Group	M1149	Zrn	U-Pb	TIMS	conc	562.89	±0.49	0.49	Maloof et al., (2005)
Western Anti-Atlas	Ighrem inlier	Tuff within the Lie de Vin Formation, near Tiout/ Bed 566 of Monniger (1979) lies 763 m above the base of the Lie de vin Formation, and is about 10 m above the level from which Latham and Riding (1990) reported the calcareous alga Kordephyton.	TIOUT-566	Zrn	U-Pb	TIMS	207/206	523	±2	2	Landing et al., (1998)
Western Anti-Atlas	Ighrem inlier	Tuff within the Lie de Vin Formation, near Tiout/ Bed 566 of Monniger (1979) lies 763 m above the base of the Lie de vin Formation, and is about 10 m above the level from which Latham and Riding (1990) reported the calcareous alga Kordephyton.	TIOUT-566	Zrn	U-Pb	TIMS	206/238	522.4	± 2.5	2.5	Landing et al., (1998)
Western Anti-Atlas	Ighrem inlier	Tuff within the Lie de Vin Formation, near Tiout/ Bed 566 of Monniger (1979) lies 763 m above the base of the Lie de vin Formation, and is about 10 m above the level from which Latham and Riding (1990) reported the calcareous alga Kordephyton.	TIOUT-566	Zrn	U-Pb	TIMS	207/235	522.4	± 1.1	1.1	Landing et al., (1998)
Western Anti-Atlas	Ighrem inlier	Tuff within the Lie de Vin Formation, near Tiout/ Bed 566 of Monniger (1979) lies 763 m above the base of the Lie de vin Formation, and is about 10 m above the level from which Latham and Riding (1990) reported the calcareous alga Kordephyton.	TIOUT-566	Zrn	U-Pb	TIMS	conc	522.4	±2	2	Landing et al., (1998)
Western Anti-Atlas	Ighrem inlier	Tuff within the Lie de Vin Formation, near Tiout/ Bed 566 of Monniger (1979) lies 763 m above the base of the Lie de vin Formation, and is about 10 m above the level from which Latham and Riding (1990) reported the calcareous alga Kordephyton.	TIOUT-566	Zrn	U-Pb	TIMS	206/238	521.10	±0.11	0.11	Landing et al., (2017)
Western Anti-Atlas	Ighrem inlier	Tuff within the boundary Igoudine Formation/ Tiout Member- Amouslek Formation	ASH Ti-Am-0.0	Zrn	U-Pb	TIMS	206/238	519.23	± 0.14	0.14	Landing et al., (2017)
Western Anti-Atlas	Ighrem inlier	Tuff within the Amouslek Formation	ASH Ti-Am-34.0	Zrn	U-Pb	TIMS	206/238	518.99	± 0.14	0.14	Landing et al., (2017)
Western Anti-Atlas	Tagragra of Akka inlier	Dacite Dyke/ Ouarzazate Group	DG 169	Zrn	U-Pb	SHRIMP	207/206	600	± 5	5	Gasquet et al. 2004
Western Anti-Atlas	Kerdous inlier	Ouarzazate Supergroupe/Tafrawt Group/ Iyghchchane Formation/Ait Wachhal Member/ Ait Wachhal rhyolitic Ignimbrite	K 404	Zrn	U-Pb	TIMS		570	36	36	O'Connor et al (2010)
Western Anti-Atlas	Kerdous inlier	Ouarzazate Group/Mselat Rhyolitic lava flows	AWTB051	Zrn	U-Pb	SHRIMP		561.2	± 5.5	5.5	Calves et al., (2006)
Western Anti-Atlas	Kerdous inlier	Ouarzazate Supergroupe/Tafrawt Group/ Iyghchchane Formation/Tagdiycht Member/ Tagdiycht rhyolitic Ignimbrite	K 496	Zrn	U-Pb	TIMS		614	± 38	38	O'Connor et al (2010)
Western Anti-Atlas	Kerdous inlier	Ouarzazate Supergroupe/Oufoud Group/ Tiygdrn Formation/ Tiygdrn Ignimbrite	K 706	Zrn	U-Pb	TIMS		545	± 11	11	O'Connor et al (2010)
Western Anti-Atlas	Kerdous inlier	Ouarzazate Supergroupe/Aït Baha Group/ Tazeyout Formation/ Ignimbrite de Tazeyout	K 948	Zrn	U-Pb	TIMS		548	± 11	11	O'Connor et al (2010)
Western Anti-Atlas	Kerdous inlier	Ouarzazate Supergroupe/Aït Baha Group/ Assirdrar Formation/ Assirdrar Ignimbrite	K 752	Zrn	U-Pb	TIMS		555	± 7	7	O'Connor et al (2010)
Western Anti-Atlas	Kerdous inlier	Ouarzazate Supergroupe/Aït Baha Group/Tifghilt Formation/ Tifghilt Ignimbrite	K 733	Zrn	U-Pb	TIMS		565	± 8	8	O'Connor et al (2010)
Western Anti-Atlas	Kerdous inlier	Ouarzazate Supergroupe/Aït Baha Group/Aït Mar Formation/Aït Mar Ignimbrite	K 986	Zrn	U-Pb	LA-PMMS		600	± 50	50	O'Connor et al (2010)
Western Anti-Atlas	Kerdous inlier	Syn-Ouarzazate Group granites/Granodiorite Tarçouate	KER 1	Zrn	U-Pb	SIMS	up.int	583	± 11	11	Aït Malek (1997); Aït Malek et al., (1998)
Western Anti-Atlas	Kerdous inlier	Syn-Ouarzazate Group granites/Granodiorite Tarçouate	KER 1	Zrn	U-Pb	SIMS	207/206	582	± 1	1	Aït Malek (1997); Aït Malek et al., (1998)
Western Anti-Atlas	Kerdous inlier	Syn-Ouarzazate Group granites/Granodiorite Tarçouate	KER 1	Zrn	U-Pb	SIMS	207/206	587	± 3	3	Aït Malek (1997); Aït Malek et al., (1998)
Western Anti-Atlas	Kerdous inlier	Syn-Ouarzazate Group granites/Gabbro-diorite Tarçouate	KER 7	Zrn	U-Pb	SIMS	up.int	560	± 2	2	Aït Malek (1997); Aït Malek et al., (1998)
Western Anti-Atlas	Kerdous inlier	Syn-Ouarzazate Group granites/Gabbro-diorite Tarçouate	KER 7	Zrn	U-Pb	SIMS	207/206	560	± 2	2	Aït Malek (1997); Aït Malek et al., (1998)
Western Anti-Atlas	Ifni inlier /Sidi Ifni 1/50 000 Sheet	Syn-Ouarzazate Group granites/Taoulecht Monzogranite	BSC_005	Zrn	U-Pb	SHRIMP		591	± 3	3	Benziane et al., (2016)
Western Anti-Atlas	Ifni inlier /Sidi Ifni 1/50 000 Sheet	Syn-Ouarzazate Group granites/Tirhit Granodiorite	FBE_004	Zrn	U-Pb	SHRIMP		590	± 4	4	Benziane et al., (2016)
Western Anti-Atlas	Ifni inlier /Mirleft 1/50 000 Sheet	Syn-Ouarzazate Group granites/Mirleft Granodiorite	FBE_030	Zrn	U-Pb	SHRIMP		571	± 3	3	Schulte et al., (2016)
Western Anti-Atlas	Ifni inlier / Tlata Al Akhçaç 1/50 000 Sheet	Syn-Ouarzazate Group granites/Tiyourhza Monzogranite	YAZ_079	Zrn	U-Pb	SHRIMP		570	± 3	3	Benziane et al., (2016)
Western Anti-Atlas	Ifni inlier /Sidi Ifni 1/50 000 Sheet	Syn-Ouarzazate Group granites/Ifni Granodiorite	YAZ_001	Zrn	U-Pb	SHRIMP		566	± 5	5	Benziane et al., (2016
Western Anti-Atlas	Ifni inlier /Sidi Ifni 1/50 000 Sheet	Syn-Ouarzazate Group granites/Mesti Granodiorite	YAZ_002	Zrn	U-Pb	SHRIMP		564	± 4	4	Benziane et al., (2016)
Western Anti-Atlas	Ifni inlier /Sidi Ifni 1/50 000 Sheet	Ouarzazate Group /Rhyolitic ignimbrite (Lower part of the volcanic pile)	YAZ_004	Zrn	U-Pb	SHRIMP		567	± 4	4	Benziane et al., (2016)
Western Anti-Atlas	Ifni inlier /Mirleft 1/50 000 Sheet	Ouarzazate Group/Rhyolite (Middle part of the volcanic pile)	FBE_028	Zrn	U-Pb	SHRIMP		567	± 4	4	Schulte et al., (2016)
Western Anti-Atlas	Ifni inlier /Sidi Ifni 1/50 000 Sheet	Syn-Ouarzazate Group granites/Rhyolite Dyke	BSC_145	Zrn	U-Pb	SHRIMP		565	± 4	4	Benziane et al., (2016)
Western Anti-Atlas	Ifni inlier /Arbaa Sahel 1/50 000 Sheet	Ouarzazate Group/Rhyolite (Upper part of the volcanic pile)	BSC_084	Zrn	U-Pb	SHRIMP		564	± 5	7	Schulte et al., (2016)
Western Anti-Atlas	Ifni inlier /Sidi Ifni 1/50 000 Sheet	Ouarzazate Group/Basalt	YAZ_114	Zrn	U-Pb	SHRIMP		569	± 4	4	Benziane et al., (2016)
Western Anti-Atlas	Bas Drâa inlier	Syn-Ouarzazate Group granites/Gellaba Suite/Drâa Granite	BD 161	Zrn	U-Pb	LA-PIMMS	conc	570	± 15	15	O'Connor et al (2010)
Western Anti-Atlas	Bas Drâa inlier	Syn-Ouarzazate Group granites/Gellaba Suite/Sidi Mohammed Granite (Taourgha Granite)	BD 143	Zrn	U-Pb	TIMS		579	± 3	3	O'Connor et al (2010)
Western Anti-Atlas	Bas Drâa inlier	Syn-Ouarzazate Group granites/Gellaba Suite/Taourgha Granite	GRF	Zrn	U-Pb	SIMS	up.int	575	± 2	2	Aït Malek (1997)
Western Anti-Atlas	Bas Drâa inlier	Syn-Ouarzazate Group granites/Gellaba Suite/Taourgha Granite	GRF	Zrn	U-Pb	SIMS	up.int	575	± 4	4	Aït Malek et al., (1998)
Western Anti-Atlas	Bas Drâa inlier	Ouarzazate Group/Houssi El Gah Rhyolite/10 m thick Houssi El Gah rhyolite which is located 75 m below the first Tabia Member carbonates at Bas Drâa. The lava flow is the youngest in a thick pile of felsic volcanics	M22	Zrn	U-Pb	TIMS	conc	560	± 2.1	2.1	Maloof, (2004); Maloof et al., (2005)
Western Anti-Atlas	Bas Drâa inlier	Ouarzazate Group/Rhyolitic ignimbrite unit AO I	BD 107	Zrn	U-Pb	LA-ICPMS		564.8	± 1.7	1.7	Karaoui et al., (2014)
Western Anti-Atlas	Bas Drâa inlier	Ouarzazate Group/Rhyolitic ignimbrite unit AO I	BD 107	Zrn	U-Pb	LA-ICPMS		564.8	± 5.6	5.6	Karaoui et al., (2015)
Western Anti-Atlas	Bas Drâa inlier	Ouarzazate Group/Rhyolitic ignimbrite unit AO I	BD 107	Zrn	U-Pb	LA-ICPMS		567.8	± 5.7	5.7	Karaoui et al., (2015)
(1) Mineral: Tn: titanite; Zrn: zircon
(2) Method : CA-TIMS: Chemical Abrasion- Thermal Ionization Mass Spectrometry; ID-TIMS : Isotope Dilution-Thermal Ionization Mass Spectrometry; LA-ICP-MS : Laser Ablation Inductively Coupled Plasma Mass Spectrometry; LAM-ICP-MS: Laser Ablation Microprobe- Inductively Coupled Plasma Mass Spectrometry; SHRIMP: Sensitive High Resolution Ion Microprobe; SIMS: Secondary Ion Mass Spectrometry; TIMS: Th…
(3) 206/238: avg. 206Pb/238U date; 207/206: avg. 207Pb/206Pb date; conc: conordia age or concordant analyses; up.int: upper intercept; lo.int.: lower intercept
