# Supplementary material
Source: publisher figshare collection journal article supplement (https://gsapubs.figshare.com/ndownloader/files/23319197)
Supplement: Supplementary file 1 [file 23319197 › Text-DR1.pdf]

**DR2020099** accompanies Youbi, N., Ernst, R.E., Soderlund, U., Boumehdi, M.A., Ait Lahna, A., Tassinari, C.C.G., El Moume, W., and Bensalah, M.K., 2020, The Central Iapetus magmatic province: An updated review and link with the ca. 580 Ma Gaskiers glaciation, *in* Adatte, T., Bond, D.P.G., and Keller, G., eds., Mass Extinctions, Volcanism, and Impacts: New Developments: Geological Society of America Special Paper 544, p. 35–66, [https://doi.org/10.1130/2020.2544\(02\)](https://doi.org/10.1130/2020.2544(02)).

### **Text DR1. References cited in Table DR1**

- Baird, G.B., Figg, S. A., and Chamberlain, K. R. 2014, Intrusive age and geochemistry of the Kebne Dyke Complex in the Seve Nappe Complex, Kebnekaise Massif, arctic Sweden Caledonides: *Journal of the Geological Society of Sweden GFF*, v. 136, no. 4, p. 556–570, [doi.org/10.1080/11035897.2014.924553](https://doi.org/10.1080/11035897.2014.924553)
- Bingen B, Griffin WL, Torsvik TH, Saeed A, 2005, Timing of Late Neoproterozoic glaciation on Baltica constrained by detrital zircon geochronology in the Hedmark Group, southeast Norway: *Terra Nova*, v. 17, 3, p. 250–258, [doi.org/10.1111/j.1365-3121.2005.00609.x](https://doi.org/10.1111/j.1365-3121.2005.00609.x)
- Blein, O., Baudin, T., Chèvremont, P., Soulaïmani, A., Admou, H., Gasquet, P., Cocherie, A., Egal, E., Youbi, N., Razin, P., Bouabdelli, M., Gombert, P., 2014a, Geochronological constraints on the polycyclic magmatism in the Bou Azzer-El Graara inlier (Central Anti-Atlas Morocco): *Journal of African Earth Sciences*, v. 99, p. 287–306, [doi.org/10.1016/j.jafrearsci.2014.04.021](https://doi.org/10.1016/j.jafrearsci.2014.04.021)
- Bowring, S.A., Myrow, P.M., Landing, E., and Ramezani, J., 2003, Geochronological constraints on terminal Neoproterozoic events and the rise of metazoans: *Geophysical Research Abstracts*, v. 5, 13219, p. 219.
- Calver, C.R., Black, L.P., Everard, J.L., Seymour, D.B., 2004, U-Pb zircon age constraints on late Neoproterozoic glaciation in Tasmania: *Geology*, v. 32, p. 893-896. [doi:10.1130/G20713.1](https://doi.org/10.1130/G20713.1)
- Calver, C.R.; Crowley, J.L., Wingate, M.T.D., Evans, D.A.D., Raub, T.D. and Schmitz, M.D., 2013, Globally synchronous Marinoan deglaciation indicated by U-Pb geochronology of

- the Cottons Breccia, Tasmania, Australia: *Geology*, v. 41 (10), p. 1127-1130.  
[doi.org/10.1130/G34568.1](https://doi.org/10.1130/G34568.1)
- Campanha, G.A.C., Basei, M.S., Tassinari, C.C.G., Nutman, A.P., and Faleiros, F.M., 2008, Constraining the age of the Iporanga Formation with SHRIMP U-Pb zircon: Implications for possible Ediacaran glaciation in the Ribeira Belt, SE Brazil: *Gondwana Research*, v. 13, p. 117-125, [doi.org/10.1016/j.gr.2007.05.010](https://doi.org/10.1016/j.gr.2007.05.010)
- Chumakov, N.M., 2004, Climates and climate zonality of the Vendian: geological evidence, *in* Vickers-Rich, P., Komarower, P., eds., *The Rise and Fall of the Ediacaran Biota*. Geological Society of London, v. 286. Special Publications, p. 15-26, <https://doi.org/10.1144/SP286.2>
- De Souza, S.C.D.R., 2015, Revisão estratigráfica das unidades superiores da faixa paraguai norte: litoestratigrafia, quimioestratigrafia (C e Sr) e geocronologia (U-Pb). Mato Grosso, Brasil. 2015. xiv, 98 f., il. Dissertação N° 349 (Mestrado em Geologia, Master Thesis in Geology)-Universidade de Brasília, Brasília.  
<http://repositorio.unb.br/handle/10482/19599>
- Dempster, T.J., Rogers, G., Tanner, P.W.G., Bluck, B.J., Muir, R.J., Redwood, S.D., Ireland, T.E., Patterson, B.A., 2002, Timing of deposition, orogenesis and glaciation within the Dalradian rocks of Scotland: constraints from U-Pb zircon ages: *Journal of the Geological Society, London*, v. 159, p. 83–94, [doi.org/10.1144/0016-764901061](https://doi.org/10.1144/0016-764901061)
- Ducrot, J. 1979, Datation à 615 Ma de la grandiorite de Bleida et conséquences sur la chronologie des phases tectoniques, métamorphiques et magmatiques pan-africaines dans l'Anti-Atlas marocain : *Bulletin de la Société Géologique de France*, v. S7-XXI (4), p. 495-499, [doi.org/10.2113/gssgfbull.S7-XXI.4.495](https://doi.org/10.2113/gssgfbull.S7-XXI.4.495)
- Ducrot, J., 1978, Age pan-africain de la granodiorite de Bleida (Anti-Atlas, Maroc) et conséquences. 6<sup>ème</sup> Réunion Annuelle des Sciences de la Terre, Orsay, p. 150.

- Edwards, M.B., 1984, Sedimentology of the Upper Proterozoic Glacial Record, Vestertana Group, Finnmark, North Norway. Norges Geologiske Undersøkelse Bulletin, vol. 394. 76 p
- Etemad-Saeed, N., Hosseini-Barzi, M., Adabi, M., Miller, N. R., Sadeghi, A., Houshmandzadeh, A., & Stockli, D. F., 2016, Evidence for ~560 Ma Ediacaran glaciation in the Kahar Formation, Central Alborz Mountains, northern Iran: Gondwana Research, v. 31, p. 164–183. doi.org/10.1016/j.gr.2015.01.005
- Gostin, V.A., McKirdy, D.M., Webster, L.J., and Williams, G.E., 2010, Ediacaran ice-rafting and coeval asteroid impact, South Australia: Insights into the terminal Proterozoic environment: Australian Journal of Earth Sciences, v. 57, p. 859–869, doi:10.1080/08120099.2010.509408.
- Graindor, M.J., 1964. Les tillites anté-cambriennes de Normandie : Geologische Rundschau, v. 54, p. 61–83, doi.org/10.1007/BF01821170
- Grazhdankin, D.V., Marusin, V.V., Meert, J., Krupenin, M.T., Maslov, A.V., 2011, Kotlin regional stage in the South Urals: Doklady Earth Sciences, v. 440, p. 1222–1226, doi.org/10.1134/S1028334X11090170
- Grotzinger, J. P., Bowring, S. A., Saylor, B. Z., and Kaufman, A. J., 1995, Biostratigraphic and Geochronologic Constraints on Early Animal Evolution: Science, v. 270, Issue 5236, p. 598-604, doi: 10.1126/science.270.5236.598
- Guerrot, C., and Peucat, J.J., 1990, U-Pb geochronology of the late Proterozoic Cadomian Orogeny in the Northern Armorican Massif, France, in, D’Lemos, R.S., Strathan, R.A. and Topley C.G. eds., The Cadomian Orogeny: Geological Society of London, Special Publications, v. 51, p. 13-26, doi.org/10.1144/GSL.SP.1990.051.01.02
- Halliday, A.N., Graham, C.M., Aftalon, M., Dymoke, P.L., 1989, The depositional age of the Dalradian Supergroup: U-Pb and Sm-Nd isotopic studies of the Tayvallich Volcanics,

- Scotland: Journal of the Geological Society, London, v. 146, p., 3-6,  
[doi.org/10.1144/gsjgs.146.1.0003](https://doi.org/10.1144/gsjgs.146.1.0003)
- Hanley, L. M., and Wingate, M. T. D., 2000, SHRIMP zircon age for an Early Cambrian  
dolerite dyke: an intrusive phase of the Antrim Plateau Volcanics of northern Australia:  
Australian Journal of Earth Sciences, v. 46, 1029-1040,
- Hannah, J. L., Stein, H.J., Yang, G., Zimmerman, A., and Bernard Bingen Re-Os Dating of  
Black Shales: Timing and Duration of Sedimentary Processes. Adapted from oral  
presentation at AAPG Annual Convention, San Antonio, TX, April 20-23, 2008 Search  
and Discovery Article #40365 (2008)
- He, J.W., Zhu, W.B., Ge, R.F., 2014, New age constraints on Neoproterozoic diamictites in  
Kuruktag, NW China and Precambrian crustal evolution of the Tarim Craton:  
Precambrian Research, v. 241, p. 44-60, [doi.org/10.1016/j.precamres.2013.11.005](https://doi.org/10.1016/j.precamres.2013.11.005)
- Hoffman, P.F., Li, Z.X., 2009, A palaeogeographic context for Neoproterozoic glaciation.  
Palaeogeography, Palaeoclimatology, Palaeoecology v. 277, p. 158–172,  
[doi.org/10.1016/j.palaeo.2009.03.013](https://doi.org/10.1016/j.palaeo.2009.03.013)
- Hoffman, P.I F., Calver, C.R., Halverson, G.P., 2009, Cottons Breccia of King Island,  
Tasmania: Glacial or non-glacial, Cryogenian or Ediacaran? : Precambrian Research v.  
172, 311-322, [doi.org/10.1016/j.precamres.2009.06.003](https://doi.org/10.1016/j.precamres.2009.06.003)
- Hofmann, M., Linnemann, U., Hoffmann, K.-H., Germs, G., Gerdes, A., Marko, L.,  
Eckelmann, K., Gärtner, A., Krause, R., 2015, The four Neoproterozoic glaciations of  
southern Namibia and their detrital zircon record: The fingerprints of four crustal growth  
events during two supercontinent cycles Precambrian Research, v. 259, p. 176-188,  
[doi.org/10.1016/j.precamres.2014.07.021](https://doi.org/10.1016/j.precamres.2014.07.021)
- Inglis, J.D., MacLean, J.S., Samson, S.D., D’Lemos, R.S., Admou, H., Hefferan, K., 2004, A  
precise U-Pb zircon age for the Bleïda granodiorite, Anti-Atlas, Morocco: implications

- for the timing of deformation and terrane assembly in the eastern Anti-Atlas: *Journal African Earth Sciences*, v. 39, p. 277–283, doi:10.1016/j.jafrearsci.2004.07.041
- Jourdan, F., Hodges, K., Sell, B., Schaltegger, U., Wingate, M.T.D., Evins, L.Z., Söderlund, U., Haines, P.W., Philips, D., Blenkinsop T., 2014. High-precision dating of the Kalkarindji large igneous province, Australia, and synchrony with the Early–Middle Cambrian (Stage 4–5) extinction: *Geology*, v. 42, p. 543–546, doi.org/10.1130/G35434.1
- Kirsch, M., and Svenningsen, O., 2015, Root zone of a continental rift: the Neoproterozoic Kebnekaise Intrusive Complex, northern Swedish Caledonides, in Söderlund, U., Klausen, M.B., Ernst, R.E., and Bleeke W., eds., *New advances in using large igneous provinces (LIPs) to reconstruct ancient supercontinents*: *Journal of the Geological Society of Sweden GFF*, v. 138, 1, p. 31–53, doi.org/10.1080/11035897.2015.1055298
- Kumpulainen, R. A., Hamilton, M. A., Söderlund U. , and J. P. Nystuen, 2016, A new U -Pb baddeleyite age for the Ottfjället dolerite dyke swarm in the Scandinavian Caledonides – a minimum age for late Neoproterozoic glaciation in Baltica. 32nd Nordic Geological Winter Meeting, Helsinki, Finland, Abstracts Volume, p. 171-172
- Kusky, T.M. and Matsah, M.I., 2003, Neoproterozoic dextral faulting on the Najd Fault System, Saudi Arabia, preceded sinistral faulting and escape tectonics related to closure of the Mozambique Ocean, *in* Yoshida, M., Windley, B. F. & Dasgupta, S., eds., *Proterozoic East Gondwana: Supercontinent Assembly and Breakup*: Geological Society of London, Special Publications, v. 206 , p. 327–361, doi.org/10.1144/GSL.SP.2003.206.01.16
- Kuznetsov, N. B., Belousova, E. A., Krupenin, M. T., Romanyuk, T. V., Maslov, A. V., 2017 The results of geochronological and isotope–geochemical study of zircons from tuff of the Sylvitsa Group (western slope of the Middle Urals): The origin of ash layers in

- Vendian rocks of the East European Platform: *Doklady Earth Sciences*, v. 473, 1, p. 359–362, doi.org/10.1134/S1028334X17030254
- Letsch, D., Large, S.J.E., Buechi, M.W., Winkler, W., and von Quadt, A., 2018, Ediacaran glaciations of the west African Craton-Evidence from Morocco: *Precambrian Research*, v. 310, p. 17–38, doi.org/10.1016/j.precamres.2018.02.015
- Linnemann U, Pidal AP, Hofmann M, Drost K, Quesada C, Gerdes A, Marko L, Gärtner A, Zieger J, Ulrich J, Krause R, Vickers-Rich P, Horak J, 2018, A~ 565 Ma old glaciation in the Ediacaran of peri-Gondwanan West Africa: *International Journal of Earth Sciences (Geol Rundsch)*, v. 107,( 3), p. 885–911, doi.org/10.1007/s00531-017-1520-7
- Mac Gabhann, B. A. 2005, Age constraints on Precambrian glaciations and the subdivision of Neoproterozoic time. Annual Report of IGCP Project 512, 13 p. [https://web.viu.ca/earle/geol305/labs/MacGabhann\\_05\\_Ediacaran\\_Subcommission.pdf](https://web.viu.ca/earle/geol305/labs/MacGabhann_05_Ediacaran_Subcommission.pdf) (accessed June 2018).
- Maloof, A.C., 2004, Thermal contraction cracks, polar wandering, and global carbon cycling: non-uniformitarian changes that shaped the Neoproterozoic and Early Cambrian Earth. Unpublished Ph.D thesis, The Department of Earth and Planetary Sciences, Harvard University Cambridge, Massachusetts, U.S.A., 193p.
- Maslov, A.V., Meert, J., Levashova, N.M., Ronkin, Yu.L., Grazhdankin, D.V., Kuznetsov, N.B., Krupenin, M.T., Fedorova, N.M., and Ipat'eva, I.S. 2013, New constraints for the age of Vendian glacial deposits (Central Urals): *Doklady Earth Sciences*, v.449, 1, p. 303–308, doi.org/10.1134/S1028334X13030203
- McCay, G.A., Prave, A.R., Alsop, G.I., Fallick, A.E., 2006, Glacial trinity: Neoproterozoic Earth history within the British-Irish Caledonides: *Geology*, v. 34, p. 909–912, doi.org/10.1130/G22694A.1

- McGee, B., Collins, A. S., Trindade, R. I. F., Payne, J., 2015, Age and provenance of the Cryogenian to Cambrian passive margin to foreland basin sequence of the northern Paraguay Belt, Brazil: *Geological Society of America Bulletin*, v. 127, (1-2), p. 76-86, doi:10.1130/B30842.1
- McGee, B., Collins, A.S., and Trindade, R.I., 2013, A glacially incised canyon in Brazil: Further evidence for mid-Ediacaran glaciation?: *Journal of Geology*, v. 121, p. 275–287, doi:10.1086/669979.
- Miller, N., Johnson, P.R., and Stern, R. J., 2008, Marine versus non-marine environments for the Jibalah Group, NW Arabian Shield: a sedimentologic and geochemical survey and report of possible metazoa in the Dhaiqa Formation: *The Arabian Journal for Science and Engineering*, v. 33,1C, p. 55-77.
- Nystuen, J., 1976, Late Precambrian Moelv tillite deposited on a discontinuity surface associated with a fossil ice wedge, Rendalen, southern Norway: *Norsk Geologiske Tidsskrift*, v. 56, 29–50.
- Paulsson, O., and Andréasson, P.G., 2002, Attempted break-up of Rodinia at 850 Ma: geochronological evidence from the Seve–Kalak Superterrane, Scandinavian Caledonides: *Journal of the Geological Society*, v. 159, p. 751–761, doi.org/10.1144/0016-764901-156
- Pu J.P., Bowring S.A., Ramezani J., Myrow P., Raub T.D., Landing E., Mills A., Hodgins E., Macdonald F.A., 2016, Dodging snowballs: geochronology of the Gaskiers glaciation and the first appearance of the Ediacaran biota: *Geology*, v. 44, (11), p. 955-958, doi.org/10.1130/G38284.1
- Rice, A.H.N., Edwards, M.B., Hansen, T.A., Arnaud, E. & Halverson, G.P., 2011. Glaciogenic rocks of the Neoproterozoic Smalfjord and Mortensnes formations, Vestertana Group, E. Finnmark, Norway, *in* Arnaud, E., Halverson, G.P. and Shields-

- Zhou, G. eds., The Geological Record of Neoproterozoic Glaciations. Geological Society London, Memoirs v. 36, p. 593–602, doi.org/10.1144/M36.57
- Ronkin, Yu. L., Grazhdankin, D. V., Maslov A. V., Mizens, G. A., Matukov D. I., Krupenin M. T., Petrov G. A., Lepikhina O. P., Kornilova, A. Yu., 2006, U-Pb (SHRIMP II) age of zircons from ash beds of the chernokamen formation, Vendian Sylvitsa group (Central Urals): Doklady Earth Sciences, v. 411, Issue 2, p. 1341–1345, doi.org/10.1134/S1028334X06090029
- Smith, A.G., 2009, Neoproterozoic timescales and stratigraphy, *in* Craig, J., Thurow, J., Thusu, B., Whitham, A., and Abutarruma, Y., eds., Global Neoproterozoic Petroleum Systems: The Emerging Potential in North Africa: Geological Society, London, Special Publications 326, p. 27 –54. doi.org/10.1144/SP326.2
- Spence, G.H., Le Heron, D.P., and Fairchild, I.J., 2016, Sedimentological perspectives on climatic, atmospheric and environmental change in the Neoproterozoic Era: Sedimentology, v. 63, p. 253–306, doi:10.1111/sed.12261.
- Svenningsen, O.M., 2001, Onset of seafloor spreading in the Iapetus Ocean at 608 Ma: precise age of the Sarek Dyke Swarm, northern Swedish Caledonides: Precambrian Research, v. 110, p. 241–245, doi.org/10.1016/S0301-9268(01)00189-9
- Thompson MD, Ramezani J, Crowley JL (2014) U-Pb zircon geochronology of Roxbury Conglomerate, Boston Basin, Massachusetts: Tectono-stratigraphic implications for Avalonia in and beyond SE New England: American Journal of Science, v. 314 no. 6, p. 1009-1040, doi: 10.2475/06.2014.02
- Thompson, M. D., and Bowring, S. A., 2000, Age of the Squantum “Tillite,” Boston Basin, Massachusetts: U-Pb zircon constraints on terminal Neoproterozoic glaciation: American Journal of Science, v. 300, p. 630–655, doi.org/10.2475/ajs.300.8.630

- Vickers-Rich P., Fedonkin M.A., 2007, The proterozoic (2.5 billion to 542 million years ago),  
*in* Fedonkin M.A., Gehling J.G., Grey K., Narbonne G.M., Vickers-Rich P. eds, The rise  
of animals. Evolution and Diversification of the Kingdom Animalia. The Johns Hopkins  
University Press, Baltimore, p. 29–51
- Xiao, S.-H., Bao, H.-M., Wang, H., Kaufman, A.J., Zhou, C., Li, G., Yuan, X., Ling, H.,  
2004, The Neoproterozoic Quruqtagh Group in eastern Chinese Tianshan: evidence for a  
post-Marinoan glaciation: *Precambrian Research*, v. 130, p., 1-26,  
[doi.org/10.1016/j.precamres.2003.10.013](https://doi.org/10.1016/j.precamres.2003.10.013)
- Xu, B., Xiao, S., Zou, H.-B., Chen, Y., Li, Z.-X., Song, B., Liu, D.-Y., Zhou, C.-M., Yuan,  
X.-L., 2009, SHRIMP zircon U–Pb age constraints on Neoproterozoic Quruqtagh  
diamictites in NW China: *Precambrian Research*, v. 168, p., 247–258,  
[doi.org/10.1016/j.precamres.2008.10.008](https://doi.org/10.1016/j.precamres.2008.10.008)
