# Supplementary material
Source: publisher figshare collection journal article supplement (https://gsapubs.figshare.com/ndownloader/files/23319197)
Supplement: Supplementary file 1 [file 23319197 › Text-DR2.pdf]

**DR2020099** accompanies Youbi, N., Ernst, R.E., Soderlund, U., Boumehdi, M.A., Ait Lahna, A., Tassinari, C.C.G., El Moume, W., and Bensalah, M.K., 2020, The Central Iapetus magmatic province: An updated review and link with the ca. 580 Ma Gaskiers glaciation, *in* Adatte, T., Bond, D.P.G., and Keller, G., eds., *Mass Extinctions, Volcanism, and Impacts: New Developments*: Geological Society of America Special Paper 544, p. 35–66, [https://doi.org/10.1130/2020.2544\(02\)](https://doi.org/10.1130/2020.2544(02)).

## Text DR2. Report on the zircon U-Pb SHRIMP geochronology of the rhyodacitic juvenile fragment located at the uppermost top of the Ouarzazate Group volcanic pile (sample BP13) in the Bou Azzer inlier.

### **ANALYTICAL PROCEDURES**

Igneous zircon grains from the sample BP13 located at the uppermost top of the Ouarzazate Group volcanic pile on the Tazegzaout Section in the Bou Azzer inlier were separated, from rocks by well-known routine procedure: moderate; crushing and sieving followed by densimetric (bromoform and methylene iodide), magnetic and electromagnetic separations of the heavy minerals fraction for U-Pb age determinations at the CPGeo-USP, Brazil. The crystals were further mounted in epoxy, together with the TEMORA-2 standard (Black et al. 2004), and polished to expose the interior of the grains. After coating with Au, the polished mounts were comprehensively examined with a FEI Quanta 250 scanning electron microscope equipped with secondary-electron and cathodoluminescence (CL) detectors at CPGeo-USP; the most common conditions used in CL analysis were as follows: 60  $\mu$ A emission current, 15.0 kV accelerating voltage, 7  $\mu$ m beam diameter, 200  $\mu$ s acquisition time, and a resolution of  $1024 \times 884$ . The same mounts were afterwards analyzed by the U-Pb isotopic technique using a SHRIMP II following

the analytical procedures presented by Williams (1998). Correction for common Pb was made based on the basis of the  $^{204}\text{Pb}$  measured, and the typical error for the  $^{206}\text{Pb}/^{238}\text{U}$  ratio is less than 2%; uranium abundance and U/Pb ratios were calibrated against the TEMORA standard, and the ages were calculated using Isoplot® version 3.0 software application (Ludwig 2003). Errors are reported as  $1\sigma$  deviations and ages have been calculated at the  $2\sigma$  level.

## RESULTS

Zircons from the sample BP13 exhibit mean lengths and widths of  $147\text{ }\mu\text{m}$  and  $67\text{ }\mu\text{m}$ , respectively. The grains are euhedral to subhedral and CL images show oscillatory zoning for most of them (**Figure F1 DR2**). The Th/U ratio ranges from 0.15 to 1.67, (**Figure F2 DR2**) indicating a population of exclusively igneous origin crystallized from magmas of intermediate to felsic composition (e.g., Hoskin and Schaltegger 2003; Linnemann et al., 2007). Nineteen spots were analyzed on 16 grains. The spots were generally set on oscillatory zoned regions of the grains (**Figure F1 DR2**). The ages range from  $496 \pm 11\text{ Ma}$  to  $1249 \pm 23\text{ Ma}$  and 11 spots yielded a Concordia age of  $578.6 \pm 4.8\text{ Ma}$  (MSWD of concordance = 0.031, Probability of concordance = 0.86) interpreted as the crystallization age of the rhyodacitic juvenile fragment (**Figure F3 DR2**). The older ages are interpreted as inherited ages while the youngest ages could be a result of Pb loss.

## FIGURES

# Sample:BP13

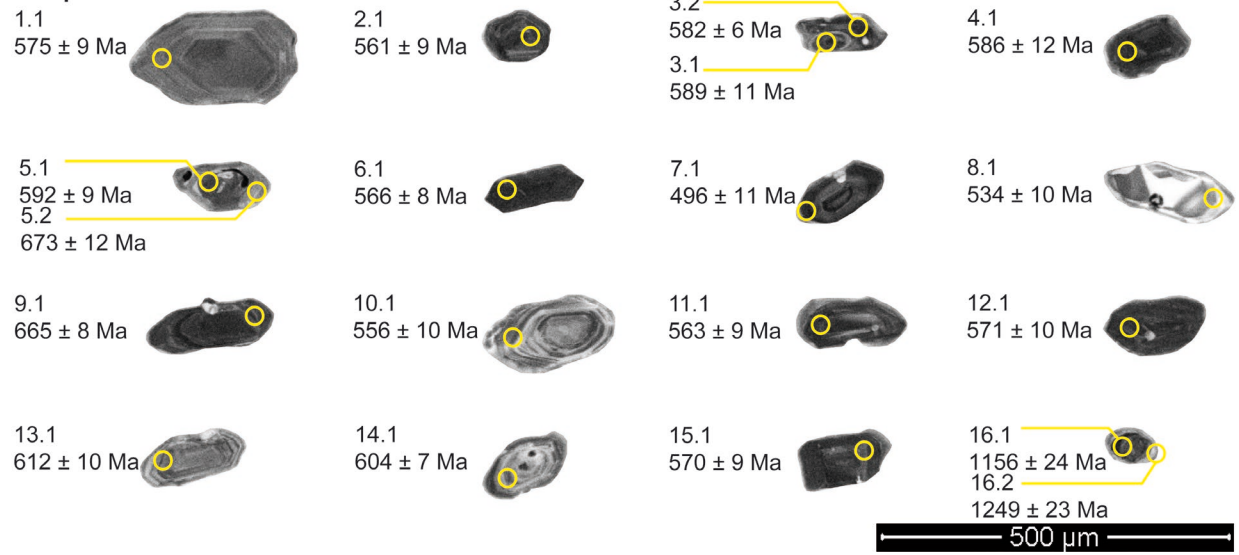

**Figure F1 DR2.** Cathodoluminescence (CL) images of zircon grains obtained from the rhyodacitic juvenile fragment located at the uppermost top of the Ouarzazate Group volcanic pile (sample BP13) in the Bou Azzer inlier showing their internal texture, laser spots (yellow circles), and apparent ages in Ma ( $1\sigma$  error).

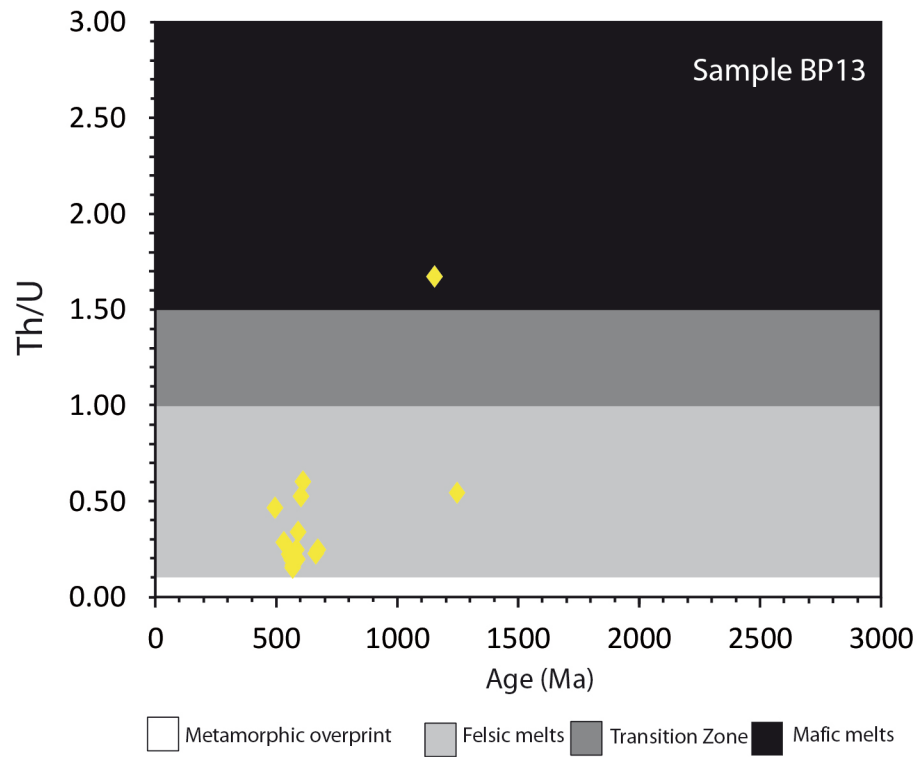

**Figure F2 DR2.** Th/U ratio vs. concordant U-Pb age of igneous zircon grains of the rhyodacitic juvenile fragment located at the uppermost top of the Ouarzazate Group volcanic pile (sample BP13) in the Bou Azzer inlier.

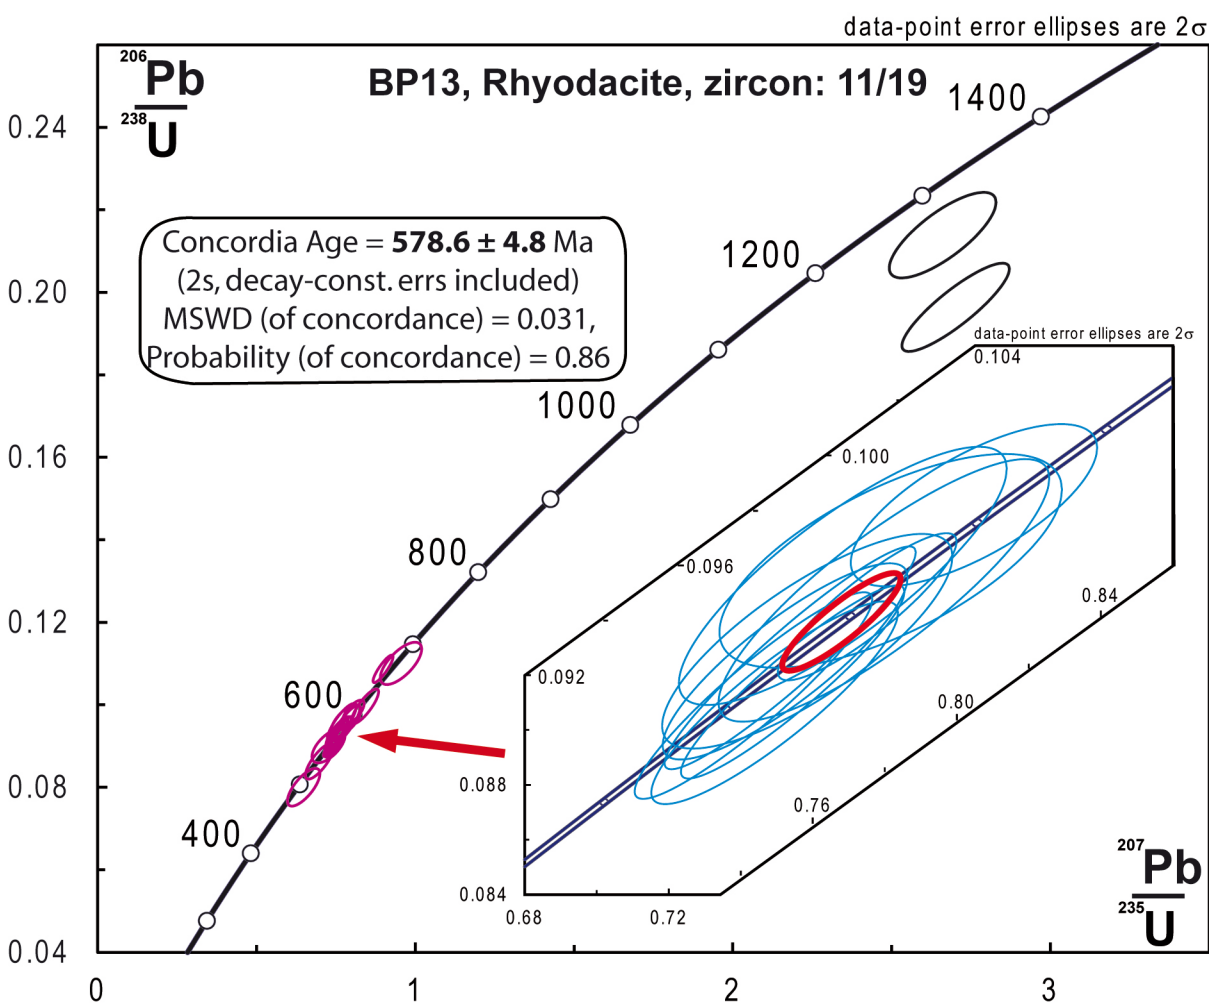

**Figure F3 DR2.** Zircon U-Pb SHRIMP geochronology: Wetherill concordia plots of U-Pb zircon data of the rhyodacitic juvenile fragment located at the uppermost top of the Ouarzazate Group volcanic pile (sample BP13) in the Bou Azzer inlier.

## REFERENCES CITED

Hoskin, P.W.O. and Schaltegger, U., 2003, The Composition of Zircon and Igneous and Metamorphic Petrogenesis, *in* Hanchar J.M., Hoskin P.W.O. eds., Zircon. Reviews in Mineralogy and Geochemistry, v. 53 (1), p. 27-62, doi.org/10.2113/0530027.

- Linnemann, U., Gerdes, A., Drost, K., Buschmann, B., 2007, The continuum between Cadomian orogenesis and opening of the Rheic Ocean: Constraints from LA-ICP-MS U-Pb zircon dating and analysis of plate-tectonic setting (Saxo-Thuringian zone, northeastern Bohemian Massif, Germany), *in* Linnemann, U., Nance, D., Kraft, P., Zulauf, G. eds., The Evolution of the Rheic Ocean: From Avalonian-Cadomian Active Margin to Alleghenian-Variscan Collision: Memoir of Geological Society of America, v. 423. Geological Society of America, Boulder, Colorado, p. 61–96, doi.org/10.1130/2007.2423(03).
- Ludwig, K.R., 2003, Isoplot 3. In: A Geochronological toolkit for Microsoft Excel. Berkeley Geochronology Centre Special Publication 1a.
- Williams, I.S., 1998, U-Th-Pb Geochronology by Ion Microprobe, *in* McKibben, M.A., Shanks, W.C., Riley, W.I. eds., Applications of microanalytical techniques to understanding mineralizing processes. Reviews in Economic Geology, v. 7, p. 1-35.
