# Supplementary material
Source: publisher figshare collection journal article supplement (https://gsapubs.figshare.com/ndownloader/files/23319197)
Supplement: Supplementary file 1 [file 23319197 › Text-DR3.pdf]

**DR2020099** accompanies Youbi, N., Ernst, R.E., Soderlund, U., Boumehdi, M.A., Ait Lahna, A., Tassinari, C.C.G., El Moume, W., and Bensalah, M.K., 2020, The Central Iapetus magmatic province: An updated review and link with the ca. 580 Ma Gaskiers glaciation, *in* Adatte, T., Bond, D.P.G., and Keller, G., eds., Mass Extinctions, Volcanism, and Impacts: New Developments: Geological Society of America Special Paper 544, p. 35–66, [https://doi.org/10.1130/2020.2544\(02\)](https://doi.org/10.1130/2020.2544(02)).

### **Text DR3. References cited in Table DR3**

- Aleinikoff, J. N.; Zartman, R. E.; Rankin, D. W.; Lyttle, P. T.; Burton, W. C.; and McDowell, R. C., 1991, New U-Pb zircon ages for rhyolite of the Catoclin and Mount Rogers Formations—more evidence for two pulses of Iapetan rifting in the central and southern Appalachians: : Geological Society of America Abstracts with Programs, v. 23, p. 2.
- Aleinikoff, J. N.; Zartman, R. E.; Walter, M.; Rankin, D. W.; Lyttle, P. T.; and Burton, W. C. 1995, U-Pb ages of metarhyolites of the Catoclin and Mount Rogers formations, Central and Southern Appalachians; evidence for two pulses of Iapetan rifting: American Journal of Science, v. 295, p. 428–454, doi: 10.2475/ajs.295.4.428
- Beranek, L., P., 2017, A magma-poor rift model for the Cordilleran margin of western North America: Geology, v. 45, (12), p. 1115–1118. doi.org/10.1130/G39265.1
- Bowring, S.A., Hoppe, W.J., 1982, U-Pb zircon ages from Mount Sheridan Gabbro, Wichita Mountains. In: Gilbert, M.C., Donovan, R.N., eds., Geology of the Eastern Wichita Mountains, Southwestern Oklahoma. Oklahoma Geological Survey Guidebook, v. 21, p. 54–59
- Brueseke, M. E., Hobbs, J. M., Bulen, C.L., Mertzman, S.A., Puckett, Walker, R. E., J. D., Feldman, J., 2016, Cambrian intermediate-mafic magmatism along the Laurentian margin: Evidence for flood basalt volcanism from well cuttings in the Southern Oklahoma Aulacogen (U.S.A.): Lithos, v. 260, p. 164–177, [dx.doi.org/10.1016/j.lithos.2016.05.016](https://doi.org/10.1016/j.lithos.2016.05.016)
- Buchan, K. L., and Hamilton, M. A., 2009, New Geochronologic and Paleomagnetic Results for the Grenville Dyke Swarm and Implications for the Ediacaran APWP for Laurentia:

EOS, Transactions of the American Geophysical Union, v. 90, n. 22, p. Jt. Assem. Suppl., Abstract GA12A-04.

Buchan, K.L., Hamilton, M.A., Davidson, A., Ernst, R.E., 2011. U–Pb geochronology and magnetic overprinting of Late Neoproterozoic dyke swarms associated with the Ottawa–Bonnechere and Timiskaming grabens and SW faults of the Upper St. Lawrence River: Geological Association of Canada Annual Meeting, Ottawa, Ontario, Canada, Abstracts, p. 29.

Burton, W.C., and Southworth, S., 2010, A model for Iapetan rifting of Laurentia based on Neoproterozoic dikes and related rocks, *in* Tollo, R.P., Bartholomew, M.J., Hibbard, J.P., and Karabinos, P.M., eds., From Rodinia to Pangea: The Lithotectonic Record of the Appalachian Region: Geological Society of America Memoir 206, p. 455–476, doi: 10.1130/2010.1206(20).

Cawood, P.A., McCausland, P.J.A., and Dunning, G.R., 2001, Opening Iapetus: Constraints from the Laurentian margin in Newfoundland: Geological Society of America Bulletin, v. 113, p. 443–453, doi.org/10.1130/0016-7606(2001)113<0443:OICFTL>2.0.CO;2

Cawood, P.A., van Gool, J.A.M., and Dunning, G.R., 1996, Geological development of eastern Humber and western Dunnage zones: Corner Brook–Glover Island region, Newfoundland: Canadian Journal of Earth Sciences, v. 33, p. 182–198, doi.org/10.1139/e96-017

Ernst, R.E., 2014, Large Igneous Provinces. Cambridge University Press, 653 p.

Ernst, R.E., and Bell, K. 2010, Large igneous provinces (LIPs) and carbonatites: Mineralogy and Petrology, v. 98, (1–4), p. 55-76. doi:10.1007/s00710-009-0074-1

Ernst, R.E., and Bleeker, W., 2010, Large igneous provinces (LIPs), giant dyke swarms, and mantle plumes: significance for breakup events within Canada and adjacent regions from

2.5 Ga to the Present: Canadian Journal of Earth Sciences, v. 47, p. 695–739, doi:10.1139/E10-025

Halls, H., C., Lovette, A., Hamilton, M., and Söderlund, U. 2015, A paleomagnetic and U-Pb geochronology study of the western end of the Grenville dyke swarm: Rapid changes in paleomagnetic field direction at ca. 585 Ma related to polarity reversals? : Precambrian Research, v. 257, p. 137–166, doi.org/10.1016/j.precamres.2014.11.029

Hanson, R.E., Mc Cleery, D.A., Crowley, J.L., Bowring, S.A., Burkholder, B.A., Finegan, S.A., Philips, C.M., Pollard, J.B., 2009, Large-scale Cambrian rhyolitic volcanism in southern Oklahoma related to opening of Iapetus: Geological Society of America Abstracts with Programs, v. 41, no. 2, p. 14

Hanson, R.E., Puckett Jr., R.E., Keller, G.R., Brueseke, M.E., Bulen, C.L., Mertzman, S.A., Finegan, S.A., McCleery, D.A., 2013, Intraplate magmatism related to opening of the southern Iapetus Ocean: Cambrian Wichita igneous province in the Southern Oklahoma rift zone: Lithos 174, p. 57–70, doi.org/10.1016/j.lithos.2012.06.003

Higgins, M. D., and van Breeman, O. 1998, The Age of the Sept Iles Layered Mafic Intrusion, Canada: Implications for the Late Neoproterozoic/Cambrian History of Southeastern Canada: The Journal of Geology, v.106, p. 421–431, doi.org/10.1086/516033

Hodych, J.P., Cox, R.A., 2007, Ediacaran U–Pb zircon dates for the Lac Matapédia and Mt St. -Anselme basalts of the Quebec Appalachians: support for a long-lived mantle plume during the rifting phase of Iapetus opening: Canadian Journal of Earth Sciences, v. 44, p. 565–581, doi.org/10.1139/e06-112

Hogan, J.P., Amato, J.M., 2015. Confirmation of temporally distinct magmatic events in the Wichita Mountains, Oklahoma: Geological Society of America Abstracts with Programs, v. 47, no. 1, p.13

- Kamo, S. L., Gower, C. F., 1994, Note: U-Pb baddeleyite dating clarifies age of characteristic paleomagnetic remanence of Long Range dykes, southeastern Labrador: *Atlantic Geology*, v. 30, p. 259–262, doi.org/10.4138/2133
- Kamo, S. L., Gower, C. F., and Krogh, T. E., 1989a, Birthdate for the Iapetus Ocean? A precise U-Pb zircon and baddeleyite age for the Long Range dikes, southern Labrador: *Geology*, v. 17, p. 602–605, doi.org/10.1130/0091-7613(1989)017<0602:BFTLOA>2.3.CO;2
- Kamo, S. L., Heaman, L. M., and Lumbers, S.B. 1989b. Age for a lamprophyre dike, Callander Bay, Ontario: Use of Ti bearing minerals as a potential geochronometer: *Geological Association of Canada, Program with Abstracts*, 14, A41.
- Kamo, S. L.; Krogh, T. E.; and Kumarapeli, P. S. 1995, Age of the Grenville dyke swarm, Ontario–Quebec: implications for the timing of Iapetan rifting: *Canadian Journal of Earth Sciences*, v. 32, p. 273–280, doi.org/10.1139/e95-022
- Kumarapeli, P. S., Dunning, G. R., Pintson, H., and Shaver, J., 1989, Geochemistry and U–Pb zircon age of comenditic metafelsites of the Tibbit Hill Formation, Quebec Appalachians: *Canadian Journal of Earth Sciences*, v. 26, p. 1374 –1383, doi.org/10.1139/e89-117
- Malka, E., Stevenson, R.K., and David, J., 1996, The petrology and petrogenesis of the Mt. Rigaud alkaline syeno-granite, Quebec: *Geological Association of Canada Program with Abstracts*, v. 21, p. A-61.
- Malka, E.; Stevenson, R. K.; and David, J. 2000. Sm-Nd Geochemistry and U-Pb Geochronology of the Mont Rigaud Stock, Quebec, Canada: A Late Magmatic Event Associated with the Formation of the Iapetus Rift: *The Journal of Geology*, v. 108, p. 569–583, doi: 10.1086/314419

- McCausland P.J.A., Van der Voo R., Hall C.M., 2007, Circum-Iapetus paleogeography of the Precambrian–Cambrian transition with a new paleomagnetic constraint from Laurentia: Precambrian Research, v. 156, p. 125-152, doi.org/10.1016/j.precamres.2007.03.004
- McCausland, P.J.A., Hankard, F., Van der Voo, R. and Hall, C.M., 2011, Ediacaran paleogeography of Laurentia: Paleomagnetism and  $^{40}\text{Ar}$ - $^{39}\text{Ar}$  geochronology of the 583 Ma Baie des Moutons syenite, Quebec: Precambrian Research, v. 187, p. 58-78, doi: 10.1016/j.precamres. 2011.02.004.
- McCausland, P. J. A., Hodych, J. P., and Dunning, G. R., 1997, Evidence from Western Newfoundland for the final breakup of Rodinia? U-Pb age and paleolatitude of the Skinner Cove Volcanics: Geological Association of Canada Annual Meeting, Abstract Volume, p. A-99.
- Miller, B.V., and Barr, S.M., 2004, Metamorphosed gabbroic dikes related to the opening of Iapetus Ocean at the St. Lawrence Promontory: Blair River inlier, Nova Scotia, Canada: The Journal of Geology, v. 112, p. 277–288, doi: 10.1086/382759
- Mitchell, R.N., Kilian, T.M., Raub, T. D., Evans, D.A. D., Bleeker, W. and Maloof, A. C., 2011, Sutton hotspot: Resolving Ediacaran-Cambrian Tectonics and true polar wander for Laurentia: American Journal of Science, v. 311 (8), p. 651-663, doi: 10.2475/08.2011.01
- Pisarevsky, S., Murphy, B., Hamilton, M., Söderlund, U., and Joseph Hodych, H., 2013, U-Pb geochronology and paleomagnetism of the Neoproterozoic St Simeon dolerite dykes, Quebec: an eastern Laurentian perspective of Ediacaran Rodinia breakup: EGU General Assembly 2013, Geophysical Research Abstracts, v. 15, p. EGU2013-3693-1
- Puffer, J.H., 2002, A late Neoproterozoic, Eastern Laurentian superplume: Location, size, chemical composition, and environmental impact: American Journal of Science, v. 302, p. 1–27, doi: 10.2475/ajs.302.1.1.

- Smith, R.C., II, 2003, Late Neoproterozoic felsite ( $602.3 \pm 2$  Ma) and associated metadiabase dikes in the Reading Prong, Pennsylvania, and rifting of Laurentia: *Northeastern Geology and Environmental Sciences*, v. 25, no. 3, p. 175–185.
- Southworth, S., Aleinikoff, J., Bailey, C., Burton, W., Crider, E., Hackley, P., Smoot, J., and Tollo, R., 2009a, *Geologic Map of the Shenandoah National Park Region, Virginia*: U.S. Geological Survey Open-File Report 2009-1153, scale 1:100,000.
- Southworth, S., Aleinikoff, J., Bailey, C., Burton, W., Crider, E., Hackley, P., Kunk, M., Mundil, R., Naeser, C., Naeser, N., Smoot, J., and Tollo, R., 2009b, New geologic map and geochronology of the Shenandoah National Park region, Virginia: *Geological Society of America Abstracts with Programs*, v. 41, no. 7, p. 365.
- Southworth, S., and Aleinikoff, J.N., 2007, Time versus tectonic significance-The disconformity at the base of the Chilhowee Group and the Neoproterozoic-Cambrian boundary : *Geological Society of America Abstracts with Program*, v. 39, no. 2, p. 9.
- Symons, D.T.A. & Chaisson, A.D., 1991, Paleomagnetism of the Callander Complex and the Cambrian apparent polar wander path for North America: *Canadian Journal of Earth Sciences*, v. 28, p. 355–36, doi.org/10.1139/e91-032
- Thomas, W.A., Tucker, R.D., Astini, R.A., 2000, Rifting of the Argentine Precordillera from southern Laurentia: palinspastic restoration of basement provinces: *Geological Society of America Abstracts with Programs* 32 (7), A-505.
- Tilton, G. R., Davis, G. L., Wetherill, G. W., and Aldrich, L. T., 1957, Isotopic ages of zircon from granites and pegmatites: *Transactions of American Geophysical Union*, v. 38, p. 360-371.
- Tilton, G.R, Wetherill, G.W., and Davis, G.L. 1962, Mineral ages from the Wichita and Arbuckle Mountains, Oklahoma and the St. Francois Mountains, Missouri: *Journal of Geophysical Research*, v. 67, p. 4011-4019.

- Tollo, R.P., Aleinikoff, J.N., Bartholomew, M.J., and Rankin, D.W., 2004, Neoproterozoic A-type granitoids of the Central and Southern Appalachians: Intraplate magmatism associated with episodic rifting of the Rodinian supercontinent: *Precambrian Research*, v. 128, p. 3–38, doi: 10.1016/j.precamres.2003.08.007.
- van Berkel, J.T., and Currie, K.L., 1988, Geology of the Puddle Pond (12A/5) and Little Grand Lake (12A/12) map areas, southwestern Newfoundland: Newfoundland Department of Mines, Mineral Development Division Report, v. 88–1, p. 99–107.
- van Staal, C.R., Chew, D.M., Zagorevski, A., McNicoll, V.J., Hibbard, J.P., Skulski, T., Castonguay, S., Escayola, M.P., and Sylvester, P.J., 2013, Evidence of late Ediacaran hyperextension of the Laurentian Iapetan margin in the Birchy Complex, Baie Vert Peninsula, northwest Newfoundland: Implications for the opening of the Iapetus, formation of peri-Laurentian microcontinents and Taconic-Grampian orogenesis: *Geoscience Canada*, v. 40, p. 94–117, doi:10.12789/geocanj.2013.40.006.
- Wall, C.J., Schmitz, M., Hanson R.E., Price, J.D., and Donovan N., 2018, High-precision U-Pb zircon Geochronology of the Wichita Igneous Province, Oklahoma. *Goldschmidt 2018 Abstract*
- Walsh, G. J., and Aleinikoff, J. N. 1999. U-Pb zircon age of metafelsite from the Pinney Hollow Formation; implications for the development of the Vermont Appalachians: *American Journal of Science*, v. 299, p. 157–170, doi: 10.2475/ajs.299.2.157
- Williams, H., Gillespie, R. T., and Van Breemen, O., 1985, A late Precambrian rift-related igneous suite in western Newfoundland: *Canadian Journal of Earth Sciences*, v. 22, p. 1727–1735, doi.org/10.1139/e85-181
- Wright, J.E., Hogan, J.P., and Gilbert, M.C., 1996, The Southern Oklahoma Aulacogen: Not just another B.L.I.P.: *EOS, Transactions of the American Geophysical Union*, v. 77, no. 46, F845.
