# Supplementary material
Source: publisher figshare collection journal article supplement (https://gsapubs.figshare.com/ndownloader/files/23319197)
Supplement: Supplementary file 1 [file 23319197 › Text-DR4.pdf]

**DR2020099** accompanies Youbi, N., Ernst, R.E., Soderlund, U., Boumehdi, M.A., Ait Lahna, A., Tassinari, C.C.G., El Moume, W., and Bensalah, M.K., 2020, The Central Iapetus magmatic province: An updated review and link with the ca. 580 Ma Gaskiers glaciation, *in* Adatte, T., Bond, D.P.G., and Keller, G., eds., Mass Extinctions, Volcanism, and Impacts: New Developments: Geological Society of America Special Paper 544, p. 35–66, [https://doi.org/10.1130/2020.2544\(02\)](https://doi.org/10.1130/2020.2544(02)).

#### **Text DR4. References cited in Table DR4.**

- Baird, G.B., Figg, S. A., and Chamberlain, K. R. 2014, Intrusive age and geochemistry of the Kebne Dyke Complex in the Seve Nappe Complex, Kebnekaise Massif, arctic Sweden Caledonides: Journal of the Geological Society of Sweden GFF, v. 136, no. 4, p. 556–570, [doi.org/10.1080/11035897.2014.924553](https://doi.org/10.1080/11035897.2014.924553)
- Bingen, B. & Solli, A. 2009, Geochronology of magmatism in the Caledonian and Sveconorwegian belts of Baltica: synopsis for detrital zircon provenance studies: Norwegian Journal of Geology (Norsk Geologisk Tidsskrift), v. 89, (4), p. 267-290.
- Bingen, B., Demaiffe, D. & van Breemen, O. 1998, The 616 Ma Old Egersund Basaltic Dike Swarm, Sw Norway, and Late Neoproterozoic Opening of the Iapetus Ocean: The Journal of Geology 106, p. 565-574, [doi.org/10.1086/516042](https://doi.org/10.1086/516042)
- Compston, W., Sambridge, M.S., Reinfrank, R.F., Moczydeowska, M., Vidal, G., and Claesson, S., 1995, Numerical ages of volcanic rocks and the earliest faunal zone within the Late Precambrian of east Poland: Journal of the Geological Society, v. 152, p. 599–611, [doi.org/10.1144/gsjgs.152.4.0599](https://doi.org/10.1144/gsjgs.152.4.0599)
- Corfu, F., Roberts, R.J., Torsvik, T.H., Ashwal, L.D., and Ramsay, D.M. 2007, Peri-Gondwanan elements in the Caledonian Nappes of Finnmark, Northern Norway: Implications for the paleogeographic framework of the Scandinavian Caledonides: American Journal of Science, v. 307, p. 434-458, doi: 10.2475/02.2007.05
- Grazhdankin, D., 2004, Patterns of distribution in the Ediacaran biotas: Facies versus biogeography and evolution: Paleobiology, v. 30, p. 203-221, doi:10.1666 /0094-8373(2004)030<0203:PODITE>2.0.CO;2.

- Grazhdankin, D.V., Marusin, V.V., Meert, J., Krupenin, M.T., Maslov, A.V., 2011, Kotlin regional stage in the South Urals. *Doklady Earth Sciences*, v. 440, p. 1222–1226, doi.org/10.1134/S1028334X11090170
- Iglesia Llanos, M.P., Tait, J.A., Popov, V., Abalmasova, A., 2005, Palaeomagnetic data from Ediacaran (Vendian) sediments of the Arkhangelsk region, NW Russia: An alternative apparent polar wander path of Baltica for the Late Proterozoic–Early Palaeozoic: *Earth and Planetary Science Letters*, v. 240, p. 732–747, doi.org/10.1016/j.epsl.2005.09.063
- Kirsch, M., and Svenningsen, O., 2015, Root zone of a continental rift: the Neoproterozoic Kebnekaise Intrusive Complex, northern Swedish Caledonides, *in* Söderlund, U., Klausen, M.B., Ernst, R.E., and Bleeke W., eds., *New advances in using large igneous provinces (LIPs) to reconstruct ancient supercontinents: Journal of the Geological Society of Sweden GFF*, v. 138, 1, p. 31–53, doi.org/10.1080/11035897.2015.1055298
- Kumpulainen, R. A., Hamilton, M. A., Söderlund U. , and J. P. Nystuen, 2016, A new U -Pb baddeleyite age for the Ottfjället dolerite dyke swarm in the Scandinavian Caledonides – a minimum age for late Neoproterozoic glaciation in Baltica. 32nd Nordic Geological Winter Meeting, Helsinki, Finland, Abstracts Volume, p. 171-172
- Kuznetsov, N. B., Belousova, E. A., Krupenin, M. T., Romanyuk, T. V., Maslov, A. V., 2017 The results of geochronological and isotope–geochemical study of zircons from tuff of the Sylvitsa Group (western slope of the Middle Urals): The origin of ash layers in Vendian rocks of the East European Platform: *Doklady Earth Sciences*, v. 473, 1, p. 359–362, doi.org/10.1134/S1028334X17030254
- Levashova, N. M., Bazhenov, M. L., Meert, J. G., Kuznetsov, N. B., Golovanova, I. V., Danukalov, K. N., and Fedorova, N. M. 2013, Paleogeography of Baltica in the Ediacaran: Paleomagnetic and geochronological data from the clastic Zigan Formation,

- South Urals: Precambrian Research, v. 236, p. 16–30, doi.org/10.1016/j.precamres.2013.06.006
- Martin, M.W., Grazhdankin, D.V., Bowring, S.A., Evans, D.A.D., Fedonkin, M.A., and Kirschvink, J.L., 2000, Age of Neoproterozoic bilaterian body and trace fossils, White Sea, Russia: Implications for metazoan evolution: Science, v. 288, p. 841–845, doi:10.1126/science.288.5467.841.
- Maslov, A.V., Meert, J., Levashova, N.M., Ronkin, Yu.L., Grazhdankin, D.V., Kuznetsov, N.B., Krupenin, M.T., Fedorova, N.M., and Ipat'eva, I.S. 2013, New constraints for the age of Vendian glacial deposits (Central Urals): Doklady Earth Sciences, v.449, 1, p. 303–308, doi.org/10.1134/S1028334X13030203
- Nosova, A.A., Kuz'menkova, O.F. & Shumlyanskiy, L.V., 2010, in Magmatism and metamorphism in Earth history. Proceedings of the 11th All-Russian petrographic meeting, p. 103–104
- Paulsson, O., and Andréasson, P.G., 2002, Attempted break-up of Rodinia at 850 Ma: geochronological evidence from the Seve–Kalak Superterrane, Scandinavian Caledonides: Journal of the Geological Society, v. 159, p. 751–761, doi.org/10.1144/0016-764901-156
- Pedersen, R.B., Dunning, G.R. & Robins, B. 1989, U-Pb ages of nepheline syenite pegmatites from the Seiland Magmatic Province, N Norway, *in* Gayer, R.A., eds., The Caledonide Geology of Scandinavia p. 3-8, Springer
- Roberts, R. J., Corfu, F., Torsvik, T. H., Hetherington, C. J., and Ashwal, L. D., 2010, Age of alkaline rocks in the Seiland Igneous Province, Northern Norway: Journal of the Geological Society, London, v. 167, 2010, p. 71-81. doi: 10.1144/0016-76492009-014.

- Roberts, D. & Walker, N. 1997, U-Pb zircon age of a dolerite dyke from near Hamningberg, Varanger Peninsula, North Norway, and its regional significance: *Norges Geologiske Undersøkelse Bulletin (NGUB)*, v. 432, p. 95-102.
- Roberts, R.J., Corfu, F., Torsvik, T.H., Ashwal, L.D. & Ramsay, D.M. 2006, Short-lived mafic magmatism at 560–570 Ma in the northern Norwegian Caledonides: U–Pb zircon ages from the Seiland Igneous Province: *Geological Magazine*, v. 143, p. 887-903, doi.org/10.1017/S0016756806002512
- Ronkin, Yu. L., Grazhdankin, D. V., Maslov A. V., Mizens, G. A., Matukov D. I., Krupenin M. T., Petrov G. A., Lepikhina O. P., Kornilova, A. Yu., 2006, U-Pb (SHRIMP II) age of zircons from ash beds of the chernokamen formation, Vendian Sylvitsa group (Central Urals): *Doklady Earth Sciences*, v. 411, Issue 2, p. 1341–1345, doi.org/10.1134/S1028334X06090029
- Root, D. & Corfu, F., 2012, U–Pb geochronology of two discrete Ordovician high-pressure metamorphic events in the Seve Nappe Complex, Scandinavian Caledonides: *Contributions to Mineralogy and Petrology*, v. 163, p. 769–788, doi.org/10.1007/s00410-011-0698-0
- Schmitz, M. D., 2012, Radiogenic isotopes geochronology, *in* Gradstein, F. M., Ogg, J.G., and Schmitz, M, Ogg, G., eds., *The Geologic Time Scale 2012*. Published by Elsevier B.V, p. 115-126, doi.org/10.1016/B978-0-444-59425-9.00006-8
- Shumlyanskiy, L.V., Andreasson, P.G., Mel'nichuk, V.G. & Derevs'ka, K.I., 2006 in Shumlyanskiy, L.V., eds., *The Volynian copper*. Scientific Transactions of Institute of Basic Research, p. 105–115, Znan'n'a.
- Shumlyanskyy, L., Nosova, A., Billström, K., Söderlund, U., Andréasson P. & Kuzmenkova, O., 2016, The U–Pb zircon and baddeleyite ages of the Neoproterozoic Volyn Large Igneous Province: implication for the age of the magmatism and the nature of a crustal

contaminant , *in* Söderlund, U., Klausen, M.B., Ernst, R.E., and Bleeke W., eds., New advances in using large igneous provinces (LIPs) to reconstruct ancient supercontinents: Journal of the Geological Society of Sweden GFF, v. 138, 1, p. 17–30, doi.org/10.1080/11035897.2015.1123289

Svenningsen, O.M., 2001, Onset of seafloor spreading in the Iapetus Ocean at 608 Ma: precise age of the Sarek Dyke Swarm, northern Swedish Caledonides: Precambrian Research, v. 110, p. 241–245, doi.org/10.1016/S0301-9268(01)00189-9
