# Supplementary material
Source: publisher figshare collection journal article supplement (https://gsapubs.figshare.com/ndownloader/files/23319197)
Supplement: Supplementary file 1 [file 23319197 › Text-DR5.pdf]

**DR2020099** accompanies Youbi, N., Ernst, R.E., Soderlund, U., Boumehdi, M.A., Ait Lahna, A., Tassinari, C.C.G., El Moume, W., and Bensalah, M.K., 2020, The Central Iapetus magmatic province: An updated review and link with the ca. 580 Ma Gaskiers glaciation, *in* Adatte, T., Bond, D.P.G., and Keller, G., eds., Mass Extinctions, Volcanism, and Impacts: New Developments: Geological Society of America Special Paper 544, p. 35–66, [https://doi.org/10.1130/2020.2544\(02\)](https://doi.org/10.1130/2020.2544(02)).

#### **Text DR5. References cited in Table DR5.**

Aït Malek, H., 1997, *Pétrologie, géochimie et géochronologie U-Pb d'associations acide-basiques : exemples du SE du Velay (Massif Central français) et de l'Anti-Atlas occidental (Maroc)*. Unpublished Ph.D thesis, Institut National Polytechnique de Lorraine, Nancy, France, 191p. (in French)

Aït Malek, H., Gasquet, D., Bertrand, J.-M., Leterrier, J., 1998, Géochronologie U-Pb sur zircon de granitoïdes éburnéens et panafricains dans les boutonnières protérozoïques d'Igherm, du Kerdous et du Bas Drâa (Anti-Atlas occidental, Maroc): Comptes Rendus de l'Académie des Sciences - Series IIA - Earth and Planetary Science, v. 327, Issue 12, p. 819-826, [doi.org/10.1016/S1251-8050\(99\)80056-1](https://doi.org/10.1016/S1251-8050(99)80056-1)

Baidada, B., Ikenne, M., Barbey, P., Alansari, A., Soulaïmani, A., Coussens, B., Haissen, F., Ilmen, S., 2017, New zircon U-Pb ages of the Imiter granitoids (Saghro massif, eastern Anti-Atlas, Morocco): Geodynamic implications. 2nd Colloquium of the International Geoscience Program IGCP638: “Geodynamics and mineralizations of paleoproterozoic formations for a sustainable development”, Casablanca, Morocco, Abstract book, p. 89-90.

Baudin, T., Chévremont, P., Razin, P., Youbi, N., Andries, D., Hoepffner, C., Thiéblemont, D., Chihani, E., Tegye, M., 2003. Carte géologique du Maroc au 1/50 000, feuille de Skhour des Rehamna, Mémoire explicatif. Notes Mémoires Service Géologique Maroc, 435 et 435bis, 114 p

- Benziane, F., Yazidi, A., Schulte, B., Boger, S., Stockhammer, S., Lehmann, A., Saadane, A., & Yazidi, M., 2016, Carte géologique du Maroc au 1/50 000, Feuille Sidi Ifni Mémoire explicatif : Notes et Mémoires du Service Géologique Maroc, n° 542 bis, 160 p.
- Benziane, F., Yazidi, A., Schulte, B., Boger, S., Stockhammer, S., Lehmann, A., Saadane, A., & Yazidi, M., 2016, Carte géologique du Maroc au 1/50 000, Feuille Tlata Al Akhçaç Mémoire explicatif : Notes et Mémoires du Service Géologique Maroc, n° 543 bis, 162 p.
- Blein, O., Baudin, T., Chèvremont, P., Soulaïmani, A., Admou, H., Gasquet, P., Cocherie, A., Egal, E., Youbi, N., Razin, P., Bouabdelli, M., Gombert, P., 2014a. Geochronological constraints on the polycyclic magmatism in the Bou Azzer-El Graara inlier (Central Anti-Atlas Morocco): *Journal of African Earth Sciences*, v. 99, p. 287 –306, doi.org/10.1016/j.jafrearsci.2014.04.021
- Blein, O., Baudin, T., Soulaïmani, A., Cocherie, A., Chèvremont, P., Admou, H., Ouanaimi, H., Hafid, A., Razin, P., Bouabdelli, M., Roger, J., 2014b. New geochemical, geochronological and structural constraints on the Ediacaran evolution of the south Sirwa, Agadir-Melloul and Iguerda inliers, Anti-Atlas, Morocco: *Journal of African Earth Sciences*, v. 98, p. 47-71, doi.org/10.1016/j.jafrearsci.2014.06.019
- Boukerrou, S., Nalini, H., Moreira, H., Maacha, L., Zouhair, M., Outhounjite, M., Ouirouane, S., Hibti, M., and Touil, A., 2018, Geochronology and geochemistry of Ediacaran volcanic rocks of the Tighardine ore deposit formation (western High Atlas, Morocco): *Arabian Journal of Geosciences*, p.11-22, doi.org/10.1007/s12517-017-3375-4
- Calves, G., Chèvremont, P., Razin, P., Baudin, T., Gabudianu, D., Roger, J. & Denis Thiéblemont, D., 2006, Carte géologique du Maroc au 1/50 000, Feuille Awkarda Notice explicative : Notes et Mémoires du Service Géologique Maroc, n° 497 bis, 114 p.

- Chebbaa, B., 1996, Metallogénie du cuivre associé aux roches volcaniques d'âge Précambrien III supérieur dans l'Anti-Atlas marocain. Unpublished Ph.D thesis, Université Lausanne, Lausanne, Suisse, 296 p. (in French)
- Cheilletz, A., Levresse, G., Gasquet, D., Aziz Samir, M.R., Zyadi, R., Archibald, D.A., and Farrar, E., 2002, The giant Imiter silver deposit: Neoproterozoic epithermal mineralization in the Anti Atlas, Morocco: *Mineralium Deposita*, v. 37, p. 772-781, doi: 10.1007/s00126-002-0317-0.
- Cocherie, A., 2001. Datations effectuées dans le cadre du projet Maroc. *Compte-Rendu Technique Bureau de Recherches Géologiques et Minières (BRGM)*, AC/81.11.01, 7 p. plus annexes.
- Compston, W., Williams, I., Kirschvink, J., Zichao, Z., and Guogan, M., 1992, Zircon U-Pb ages from the Early Cambrian time scale: *Geological Society of London Journal*, v. 149, p. 171–184, doi: 10.1144/gsjgs.149.2.0171.
- De Wall, H., Kober, B., Errami, E., Ennih, N., and Greiling, R.O., 2001, Age de mise en place et contexte géologique des granitoïdes de la boutonnière d'Imiter (Saghro oriental, Anti-Atlas, Maroc): 2ème Colloque International « Magmatisme, Métamorphisme et Minéralisations Associées », Marrakech, Morocco, v. 10-12, p. 19.
- Ducrot, J. 1979, Datation à 615 Ma de la grandiorite de Bleida et conséquences sur la chronologie des phases tectoniques, métamorphiques et magmatiques pan-africaines dans l'Anti-Atlas marocain : *Bulletin de la Société Géologique de France*, v. S7-XXI (4), p. 495-499, doi.org/10.2113/gssgfbull.S7-XXI.4.495
- Ducrot, J., 1978. Age pan-africain de la granodiorite de Bleida (Anti-Atlas, Maroc) et conséquences. 6<sup>ème</sup> Réunion Annuelle des Sciences de la Terre, Orsay, p. 150.
- Ducrot, J., et Lancelot, J. R., 1977, Problème de la limite Précambrien-Cambrien: étude radiochronologique par la méthode U–Pb sur zircons du volcan du Jbel Boho (Anti-Atlas

- marocain): Canadian Journal of Earth Sciences, v. 14, 12, p. 277 1-2777, doi.org/10.1139/e77-243
- Eddif, A., 2002, Géochronologie, pétrologie, géochimie et structure des intrusions tardi-panafricaines de Wirgane et de leur couverture néoprotérozoïque à paléozoïque (Haut-Atlas occidental). Unpublished Thesis, Mohamed V University, Rabat, Morocco, 194p.
- Eddif, A., Gasquet, D., Hoepffner, C., Levresse, G., 2007, Age of the Wirgane granodiorite intrusions (Western High-Atlas, Morocco): New U–Pb constraints: Journal of African Earth Sciences, v. 31, p. 227–231, p.
- El Haibi, H., El Hadi, H., Tahiri, A., Martínez Poyatos, D.J., Pérez Cáceres, I., 2017, New U–Pb ages of the calc-alkaline felsic volcanism of El Jadida (Moroccan Coastal Block). 2nd Colloquium of the International Geoscience Program IGCP638: “Geodynamics and mineralizations of paleoproterozoic formations for a sustainable development”, Casablanca, Morocco, Abstract book, p. 41
- El Houicha, M., Pereira, M.F., Jouhari, A., Gama, C., Ennih, N., Fekkak, A., Ezzouhairi, H., El Attari, A., Brandão Silva, J., 2018, Recycling of the Proterozoic crystalline basement in the Coastal Block (Moroccan Meseta): New insights for understanding the geodynamic evolution of the northern peri-Gondwanan realm: Precambrian Research, v. 306, p. 129-154, doi.org/10.1016/j.precamres.2017.12.039
- El Moume, W., Youbi, N., Marzoli, A., Bertrand H., Gärtner, A., Linnemann, U., Gerdes, A., Ernst R.E., Söderlund, U., El Hachimi, H., Bellieni, G., Ikenne, M., Ait Lahna, A., Tassinari, C.C.G., Bensalah, M.K., Boumehdi, M.A., and Vérati, C., 2017, The distribution of the Central Iapetus Magmatic Province (CIMP) into West African craton: U–Pb dating, geochemistry and petrology of Douar Eç-çour and Imiter mafic Dyke Swarms (High and Anti-Atlas, Morocco). 2nd Colloquium of the International Geoscience Program IGCP638: “Geodynamics and mineralizations of paleoproterozoic

formations for a sustainable development”, Casablanca, Morocco, Abstract book, p. 89-90.

Errami, E., Bonin, B., Laduron, D., Lasri, L., 2009, Petrology and geodynamic significance of the post-collisional Pan-African magmatism in the Eastern Saghro area (Anti-Atlas, Morocco): *Journal of African Earth Sciences*, v. 55, Issues 1-2, p. 105-124, doi.org/10.1016/j.jafrearsci.2009.02.006

Gasquet, D., Chèvremont, P., Baudin, T., Chalot-Prat, F., Guerrot, C., Cocherie, A., Roger, J., Hassenforder, B., Cheilletz, A., 2004, Polycyclic magmatism in the Tagragra d'Akka and Kerdous–Tafeltast inliers (Western Anti-Atlas, Morocco): *Journal of African Earth Sciences*, v., Issues 3–5, p. 267-275, doi.org/10.1016/j.jafrearsci.2004.07.062

Gasquet, D., Ennih, N., Liégeois, J.P., Soulaïmani, A., Michard, A., 2008, The PanAfrican Belt, *in* Michard, A., Saddiqi, O., Chalouan, A., Frizon de Lamotte, D. eds., *Continental Evolution: The Geology of Morocco. Lecture Notes in Earth Sciences*, v. 116, p. 33–64. Springer

Gasquet, D., Levresse, G., Cheilletz, A., Azizi-Samir, M.R., Mouttaqi, A., 2005, Contribution to a geodynamic reconstruction of the Anti-Atlas (Morocco) during Pan-African times with the emphasis on inversion tectonics and metallogenic activity at the Precambrian–Cambrian transition: *Precambrian Research*, v. 140, Issues 3–4, p. 157-182, doi.org/10.1016/j.precamres.2005.06.009

Hefferan, K., Soulaïmani, A., Samson, S., Admou, H., Inglis, J., Saquaque, A., Latifa, C., Heywood, N., 2014, A reconsideration of Pan African orogenic cycle in the Anti-Atlas Mountains, Morocco: *Journal of African Earth Sciences*, v. 98, p. 34-46, doi.org/10.1016/j.jafrearsci.2014.03.007

- Inglis, J.D., D'Lemos, R.S., Samson, S.D., Admou, H., 2005, Geochronological Constraints on Late Precambrian Intrusion, Metamorphism, and Tectonism in the Anti-Atlas Mountains: *The Journal of Geology*, v. 113, 4, p. 439-450, doi: 10.1086/430242
- Inglis, J.D., MacLean, J.S., Samson, S.D., D'Lemos, R.S., Admou, H., Hefferan, K., 2004, A precise U-Pb zircon age for the Bleïda granodiorite, Anti-Atlas, Morocco: implications for the timing of deformation and terrane assembly in the eastern Anti-Atlas: *Journal African Earth Sciences*, v. 39, p. 277–283, doi:10.1016/j.jafrearsci.2004.07.041
- Juery, A., 1976, Datation U/Pb du socle précambrien du Haut-Atlas (Maroc). Master Thesis, Paris VII University, Paris, France, 85 p.
- Jurey A., Lancelot, J. R., Hamet, J., Proust F. et Allègre, C. J., 1974, L'âge des rhyolites du Pr III du Haut-Atlas et le problème de la limite Précambrien-Cambrien. 2<sup>ème</sup> Réunion Annuelle des Sciences de la Terre. p. 230. Nancy, France
- Jurey A., Lancelot, J. R., Hamet, J., Proust F., et Allègre, C. J. 1975, Chronologie U-Pb et Rb-Sr du socle Précambrien du Haut-Atlas. 3<sup>ème</sup> Réunion Annuelle des Sciences de la Terre. p. 209. Montpellier, France
- Karaoui, B., Breitzkreutz, C., Mahmoudi, A., Youbi, N., Hofmann, M., Gärtner, A., Linnemann, U., 2015, U-Pb zircon ages from volcanic and sedimentary rocks of the Ediacaran Bas Draâ inlier (Anti-Atlas Morocco): Chronostratigraphic and provenance implications: *Precambrian Research*, v. 263, p. 43–58, doi.org/10.1016/j.precamres.2015.03.003
- Karaoui, B., Breitzkreuz, C., Mahmoudi, A., Youbi, N., 2014 Physical volcanology, geochemistry and basin evolution of the Ediacaran volcano-sedimentary succession in the Bas Draâ inlier (Ouarzazate Supergroup, Western Anti-Atlas, Morocco): *Journal of African Earth Sciences* v. 99, Part 2, p. 307-33, doi.org/10.1016/j.jafrearsci.2014.06.022

- Landing, E., Bowring, S.A., Davidek, K.L., Westrop, S.R., Geyer, G., and Heldmaier, W., 1998, Duration of the Early Cambrian: U-Pb ages of volcanic ashes from Avalon and Gondwana: *Canadian Journal Earth Sciences*, v. 35, (4), p. 329-338, doi.org/10.1139/e97-107
- Landing, Ed., Schmitz, M., Geyer, G., Samuel E. Bowring, S.E., 2017, Precise U-Pb volcanic zircon dates show diachroneity of oldest Cambrian trilobites: examples from the West Gondwanan (southern Morocco) and Avalonia paleocontinents. Conference: International Symposium on the Ediacaran-Cambrian Transition 2017, Memorial University, St. John's, Newfoundland, Canada.
- Letsch, D., El Houicha, M., von Quadt, A., Winkler, W., 2018a, A missing link in the peri-Gondwanan terrane collage: the Precambrian basement of the Moroccan Meseta and its lower Paleozoic cover: *Canadian Journal of Earth Sciences*, v. 55, (1), p. 33-51, doi.org/10.1139/cjes-2017-0086
- Letsch, D., Large, S.J.E., Buechi, M.W., Winkler, W., and von Quadt, A., 2018b, Ediacaran glaciations of the west African Craton-Evidence from Morocco: *Precambrian Research*, v. 310, p. 17–38, doi.org/10.1016/j.precamres.2018.02.015
- Levresse, G., 2001, Contribution à l'établissement d'un modèle génétique des gisements d'Imiter (Ag-Hg), Bou Madine (Pb-Zn-Cu-Ag-Au), Bou Azzer (Co, Ni, As, Au, Ag) dans l'Anti-Atlas Marocain. Unpublished Ph.D thesis, Institut National Polytechnique de Lorraine, Nancy, France, 191p. (in French)
- Levresse, G., Cheilletz, A., Gasquet, D., Reisberg, L., Deloule, E., Marty, B. and Kyser, K., 2004, Osmium, sulphur, and helium isotopic results from the giant Neoproterozoic epithermal Imiter silver deposit, Morocco: evidence for a mantle source: *Chemical Geology*, v. 207, Issues 1-2, p. 59-79, doi.org/10.1016/j.chemgeo.2004.02.004

- Maloof, A.C., 2004, Thermal contraction cracks, polar wandering, and global carbon cycling: non-uniformitarian changes that shaped the Neoproterozoic and Early Cambrian Earth. Unpublished Ph.D thesis, The Department of Earth and Planetary Sciences, Harvard University Cambridge, Massachusetts, U.S.A., 193p.
- Maloof, A.C., Ramezani, J., Bowring, S.A., Fike, D.A., Porter, S.M., Mazouad, M. 2010, Constraints on early Cambrian carbon cycling from the duration of the Nemakit-Daldynian-Tommotian boundary  $\delta^{13}\text{C}$  shift, Morocco, *Geology*, v. 38, (7), p. 623-626, doi.org/10.1130/G30726.1
- Maloof, A.C., Schrag, D.P., Crowley, J.L., and Bowring, S.A. 2005, An expanded record of Early Cambrian carbon cycling from the Anti-Atlas Margin, Morocco: *Canadian Journal of Earth Sciences*, v. 42, (12), p. 2195-2216, doi.org/10.1139/e05-062
- Massironi, M., Bertoldi, L., Calafa, P., Visonà, D., Bistacchi, A., Giardino, C., Schiavo, A., 2008, Interpretation and processing of ASTER data for geological mapping and granitoids detection in the Saghro massif (eastern Anti-Atlas, Morocco): *Geosphere*, v. 4, issue 4, p. 736-759, doi.org/10.1130/GES00161.1
- Massironi, M., Moratti, G., Algouti, A., Benvenuti, M., Dal Piaz, G.V., Eddebbi, A., El Boukhari, A., Laftouhi, N., Ouanaïmi, H., Schiavo, A., Taj-Eddine, K., and Visonà D., 2007, Carte Géologique du Maroc au 1/50000, Feuille Boumalne, Notice explicative: Notes et Mémoires Service Géologique Maroc, n° 521 bis, 80 p
- Mifdal, A., and Peucat, J.J., 1985, Datations U/Pb and Rb/Sr du volcanisme acide de l'Anti-Atlas marocain et du socle sous-jacent dans la région de Ouarzazate. Apport au problème de la limite Précambrien-Cambrien: *Sciences Géologiques Bulletin*, Strasbourg, v. 38, p. 185–200.

- Mrini, Z., 1993, Chronologie (Rb-Sr; U-Pb); traçage isotopique (Sr-Nd-Pb) des sources des roches magmatiques éburnéenne, panafricaines et hercyniennes du Maroc. PhD Thesis Cadi Ayyad University, Faculty of Sciences-Semlalia. 233p. Marrakech, Maroc.
- O'Connor, E. A., 2010, Geology of the Drâa, Kerdous, and Boumalne Districts, Anti-Atlas, Morocco, Technical Report IR/10/072, British Geological Survey, 310 p.
- Ouabid, M., Ouali, H., Garrido, C.J., Acosta-Vigil, A., Román-Alpiste, M.J., Dautria J.M., Marchesi, C. and Hidas, K. 2017, Neoproterozoic granitoids in the basement of the Moroccan Central Meseta: Correlation with the Anti-Atlas at the NW paleo-margin of Gondwana: Precambrian Research, v. 299, p. 34–57, doi.org/10.1016/j.precamres.2017.07.007
- Pelleter, E., Cheilletz, A., Gasquet, D., Mouttaqi, A., Annich, M., El Hakour, A., Deloule, E. and Féraud, G., 2007, Hydrothermal zircons: A tool for ion microprobe U–Pb dating of gold mineralization (Tamlalt–Menhouhou gold deposit-Morocco): Chemical Geology, v. 245, Issues 3–4, p. 135-161, doi.org/10.1016/j.chemgeo.2007.07.026
- Pelleter, E., Cheilletz, A., Gasquet, D., Mouttaqi, A., Annich, M., Camus, Q., Deloule, E., Ouazzani, L., Bounajma, H. and Ouchtouban, L., 2016, U/Pb Ages of Magmatism in the Zgounder Epithermal Ag– Hg Deposit, Sirwa Window, Anti-Atlas, Morocco, in, Bouabdellah, M., and Slack, J.F., eds., Mineral Deposits of North Africa, Mineral Resource Reviews, p. 143-165, Springer International Publishing Switzerland 2016, DOI 10.1007/978-3-319-31733-5\_5
- Pereira, M.F., El Houicha, M., Aghzer, A., Silva, J.B., Linnemann, U., Jouhari, A., 2014, New U-Pb zircon dating of Late Neoproterozoic magmatism in Western Meseta (Morocco). Gondwana 15, North meets South, Abstracts Book, Madrid, p. 133
- Pereira, M.F., El Houicha, M., Chichorro, M., Armstrong, R., Jouhari, A., El Attari, A., Ennih, N., Silva, J.B., 2015, Evidence of a Paleoproterozoic basement in the Moroccan

- Variscan Belt (Rehamna Massif, Western Meseta): Precambrian Research 268, p. 61–73, doi.org/10.1016/j.precamres.2015.07.010
- Pouclet, A., Ouazzani, H., Fekkak, A., 2008, The Cambrian volcano-sedimentary formations of the westernmost High Atlas (Morocco): their place in the geodynamic evolution of the West African Palaeo-Gondwana northern margin, in, Ennih, N., Liegeois, J.P., eds., The Boundaries of the West African Craton, Geological Society, London, Special Publications, v. 297, p. 303-327, doi.org/10.1144/SP297.15
- Schiavo, A., and Taj-Eddine, K., Algouti, Ah., Benvenuti, M., Dal Piaz, G.V., Eddebbi, A., El Boukhari, A., Laftouhi, N., Massironi, M., Moratti, G., Ouanaimi, H., Pasquarè, G., and Visonà, D., 2007, Carte Géologique du Maroc au 1/50 000, Feuille Imtir, Notice explicative: Notes et Mémoires Service Géologique Maroc, n° 518 bis, 96 p
- Schulte, B., Benziane, F., Yazidi, A., Boger, S., Stockhammer, S., Lehmann, A., Saadane, A, & Yazidi, M., 2016, Carte géologique du Maroc au 1/50 000, Feuille Mirleft Mémoire explicatif : Notes et Mémoires du Service Géologique Maroc, n° 540 bis, 123 p.
- Schulte, B., Benziane, F., Yazidi, A., Boger, S., Stockhammer, S., Lehmann, A., Saadane, A, & Yazidi, M., 2016, Carte géologique du Maroc au 1/50 000, Feuille Arbaa Sahel Mémoire explicatif : Notes et Mémoires du Service Géologique Maroc, n° 541 bis, 156 p.
- Soulaimani, A., Bouabdelli, M., Piqué, A., 2003, L'extension continentale au Néoprotérozoïque supérieur-Cambrien inférieur dans l'Anti-Atlas (Maroc) : Bulletin de la Société Géologique de France, v. 174, (1), p. 83-92., doi.org/10.2113/174.1.83
- Tahiri, A., Montero, P., El Hadi, H., Martínez Poyatos, D., Azor, A., Bea, F., Simancas, F., González Lodeiro, F., 2010, Geochronological data on the Rabat–Tiflet granitoids: Their bearing on the tectonics of the Moroccan Variscides: Journal of African Earth Sciences, v. 57, p. 1–13, doi.org/10.1016/j.jafrearsci.2009.07.005

- Thomas, R.J., Chevallier, L.P., Gresse, P.G., Harmer, R.E., Eglinton, B.M., Armstrong, R.A., de Beer, C.H., de Beer, C.H., Martini, J.E.J., de Kock, G.S., Macey, P.H., Ingram, B.A., 2002, Precambrian evolution of the Sirwa Window, Anti-Atlas Orogen, Morocco : Precambrian Research, v. 118, Issues 1–2, p. 1-57, doi.org/10.1016/S0301-9268(02)00075-X
- Toummite, A., Liégeois, J.P., Gasquet, D., Bruguier, O., Beraaouz, E.H., Ikenne, M., 2012 Field, geochemistry and Sr-Nd isotopes of the Pan-African granitoids from the Tifnoute Valley (Sirwa, Anti-Atlas, Morocco): a post-collisional event in a metacratonic setting: Mineralogy and Petrology, v. 107, Issue 5, p. 739–763, doi.org/10.1007/s00710-012-0245-3
- Tuduri, T., Chauvet, A., Barbanson, L., Labriki, M., Dubois, M., Trapy, P.H., Lahfid, A., Poujol, M., Jérémie Melleton, J., Badra, L., Ennaciri, A., Maacha, L., 2018, Structural control, magmatic-hydrothermal evolution and formation of hornfels-hosted, intrusion-related gold deposits: Insight from the Thaghassa deposit in Eastern Anti-Atlas, Morocco: Ore Geology Reviews, v. 97, p. 171-198, doi.org/10.1016/j.oregeorev.2018.04.023
- Walsh, G.J., Aleinikoff, J.N., Benziane, F., Yazidi, A., Armstrong, T.R., 2002, U–Pb zircon geochronology of the Paleoproterozoic Tagragra de Tata inlier and its Neoproterozoic cover, western Anti-Atlas, Morocco: Precambrian Res. 117, 1–20. Precambrian Research, v.117, Issues 1–2, p. 1-20, doi.org/10.1016/S0301-9268(02)00044-X
- Walsh, G.J., Benziane, J.N., Aleinikoff, F., Harrison, R.W., Yazidi, A., Burton, W.C., Quick, J.E., Saadane, A., 2012, Neoproterozoic tectonic evolution of the Jebel Saghro and Bou Azzer-El Graara inliers, eastern and central Anti-Atlas, Morocco: Precambrian Research, v. 216–219, p. 23-62, doi.org/10.1016/j.precamres.2012.06.010
- Youbi, N., 1998, Le volcanisme “post-collisionnel” : un magmatisme intraplaque relié à des panaches mantelliques. Etude volcanologique et géochimique. Exemples d’application

dans le Néoprotérozoïque terminal (PIII) de l'Anti-Atlas et le Permien du Maroc. PhD Thesis, Cadi Ayyad University, Marrakech, Morocco, 601 p.

Youbi, N., Ait Lahna, A., Tassinari, C.C.G., Ali Ahmadi Bensaid, I., Ernst R.E., Söderlund, U., Boumehdi, M.A., El Moume, W., Mata, J., Bensalah, M.K., Ben Abbou, M., Aarab, E.M., Rkha Chaham, K., Ezzouhairi, H., Soulaïmani, A., 2017, U-Pb zircon dating of the Ediacaran Central Iapetus Magmatic Province (CIMP) in the Meseta Domain (Morocco). 2nd Colloquium of the International Geoscience Program IGCP638: "Geodynamics and mineralizations of paleoproterozoic formations for a sustainable development", Casablanca, Morocco, Abstract book, p. 74-75.
